# Supplementary material for: Unveiling the promising in vitro anticancer activity of lipophilic platinum(ii) complexes containing (1S,4R,5R)-4-(4-phenyl-1H-1,2,3-triazol-1-yl)-2-((S)-1-phenylethyl)-2-azabicyclo[3.2.1]octane: a spectroscopic characterization and DFT calculation
Source: Royal Society of Chemistry journal article supplement (doi:10.1039/d4dt03021d), 2025-01-01

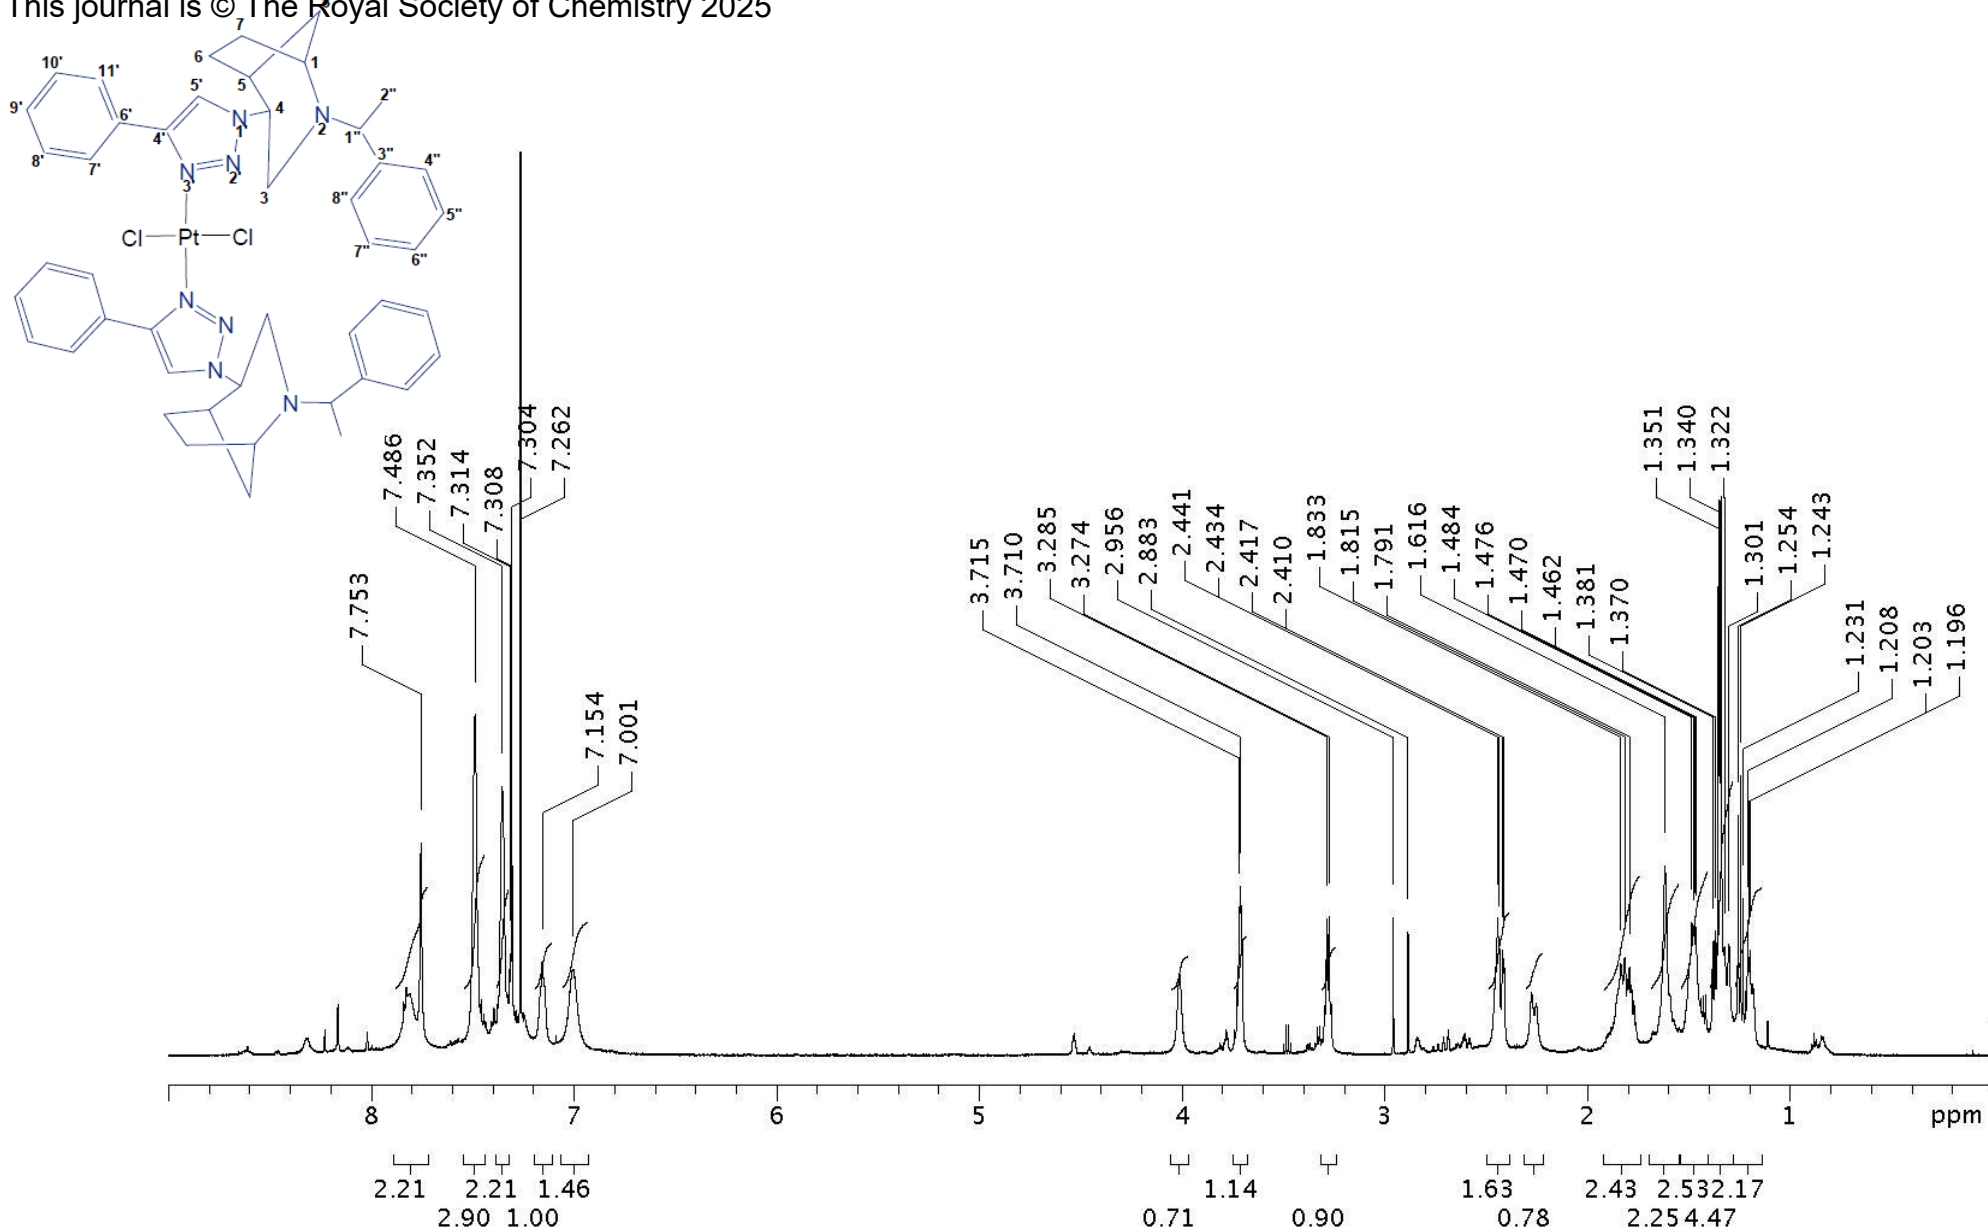

Figure S3a. <sup>1</sup>H NMR spectrum of the complex *trans*-[PtCl<sub>2</sub>L<sub>2</sub>] (**1**)

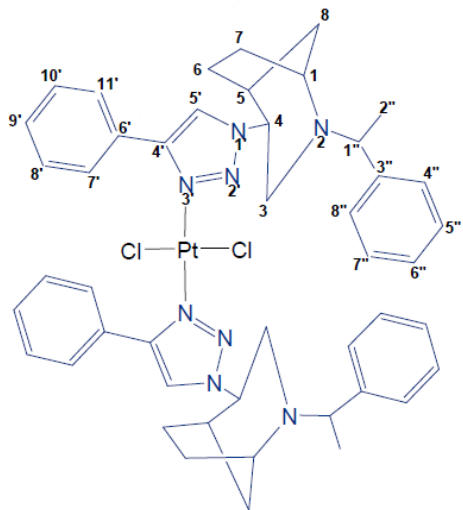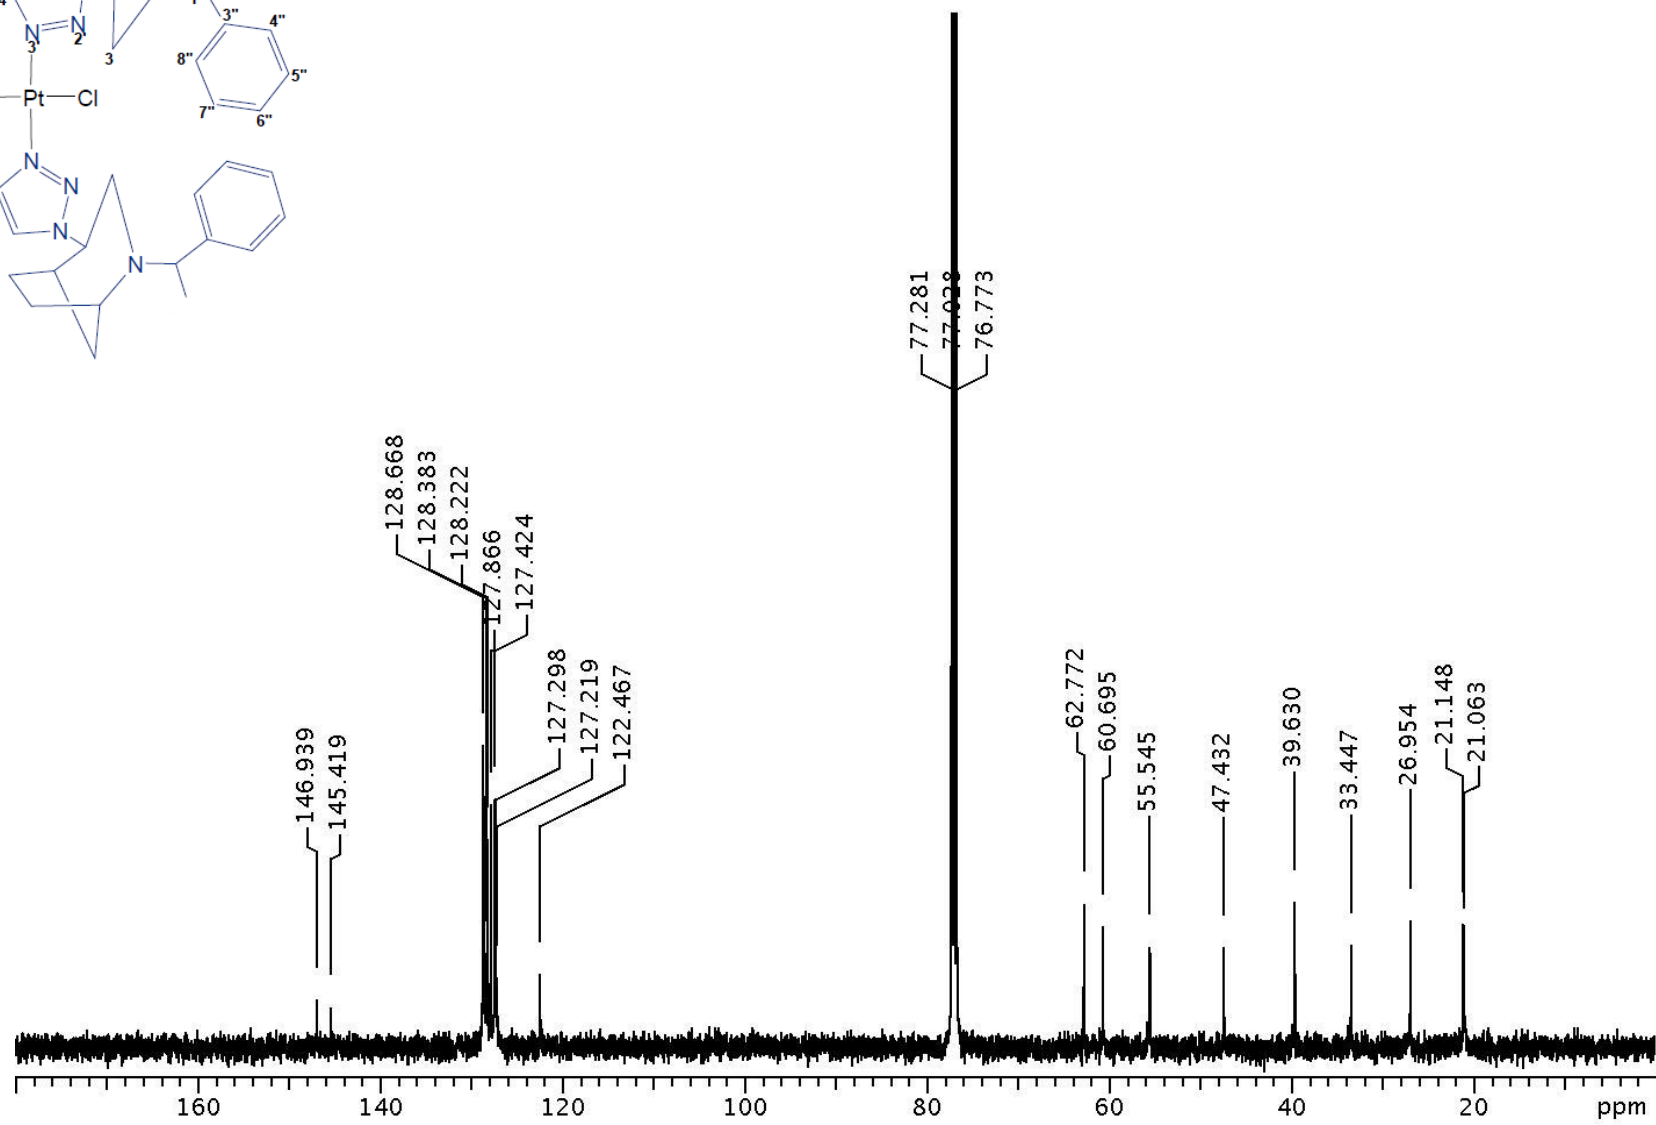

Figure S3b. <sup>13</sup>C NMR spectrum of the complex *trans*-[PtCl<sub>2</sub>L<sub>2</sub>] (**1**)

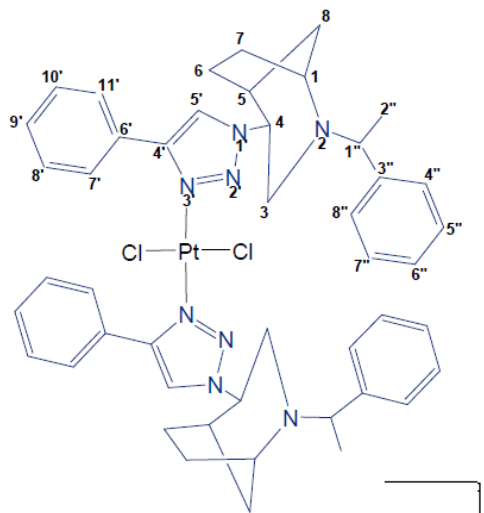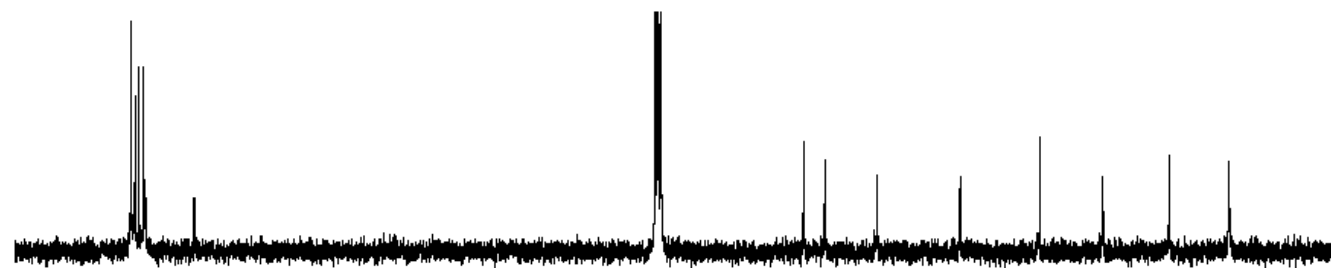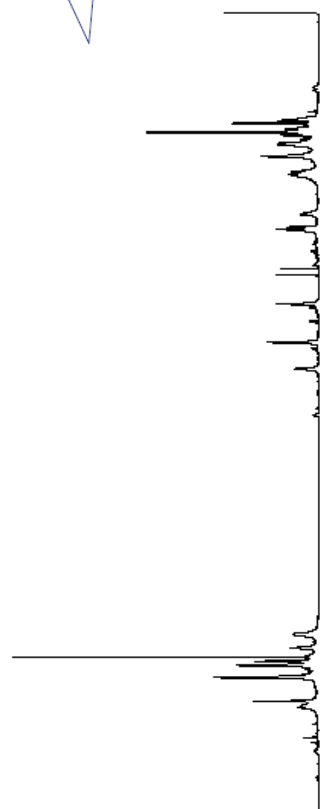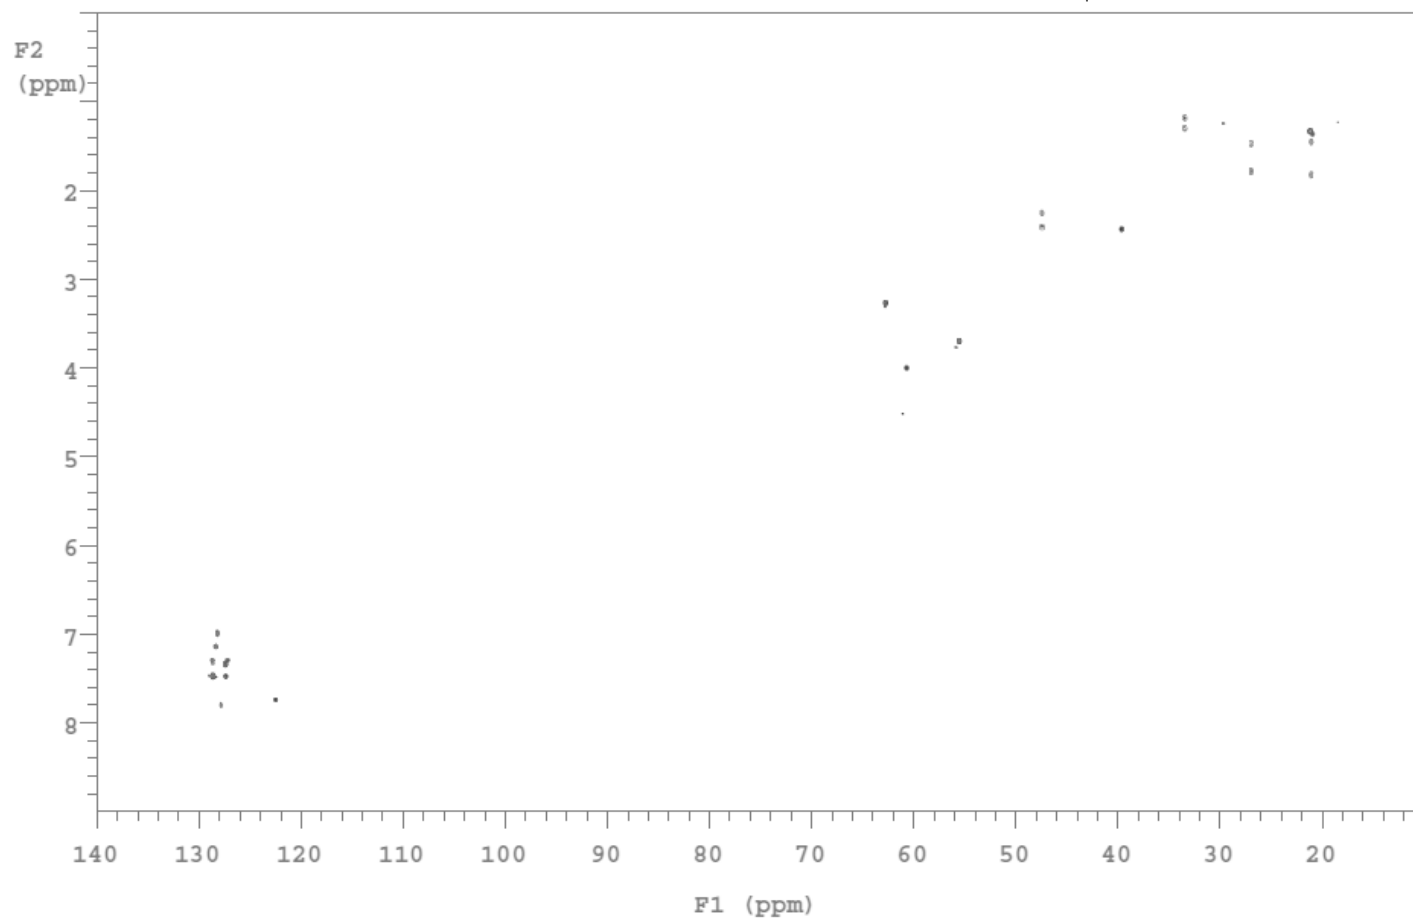

Figure S3c.  $^1\text{H}$ - $^{13}\text{C}$  HSQC NMR spectrum of the complex *trans*-[PtCl<sub>2</sub>L<sub>2</sub>] (**1**)

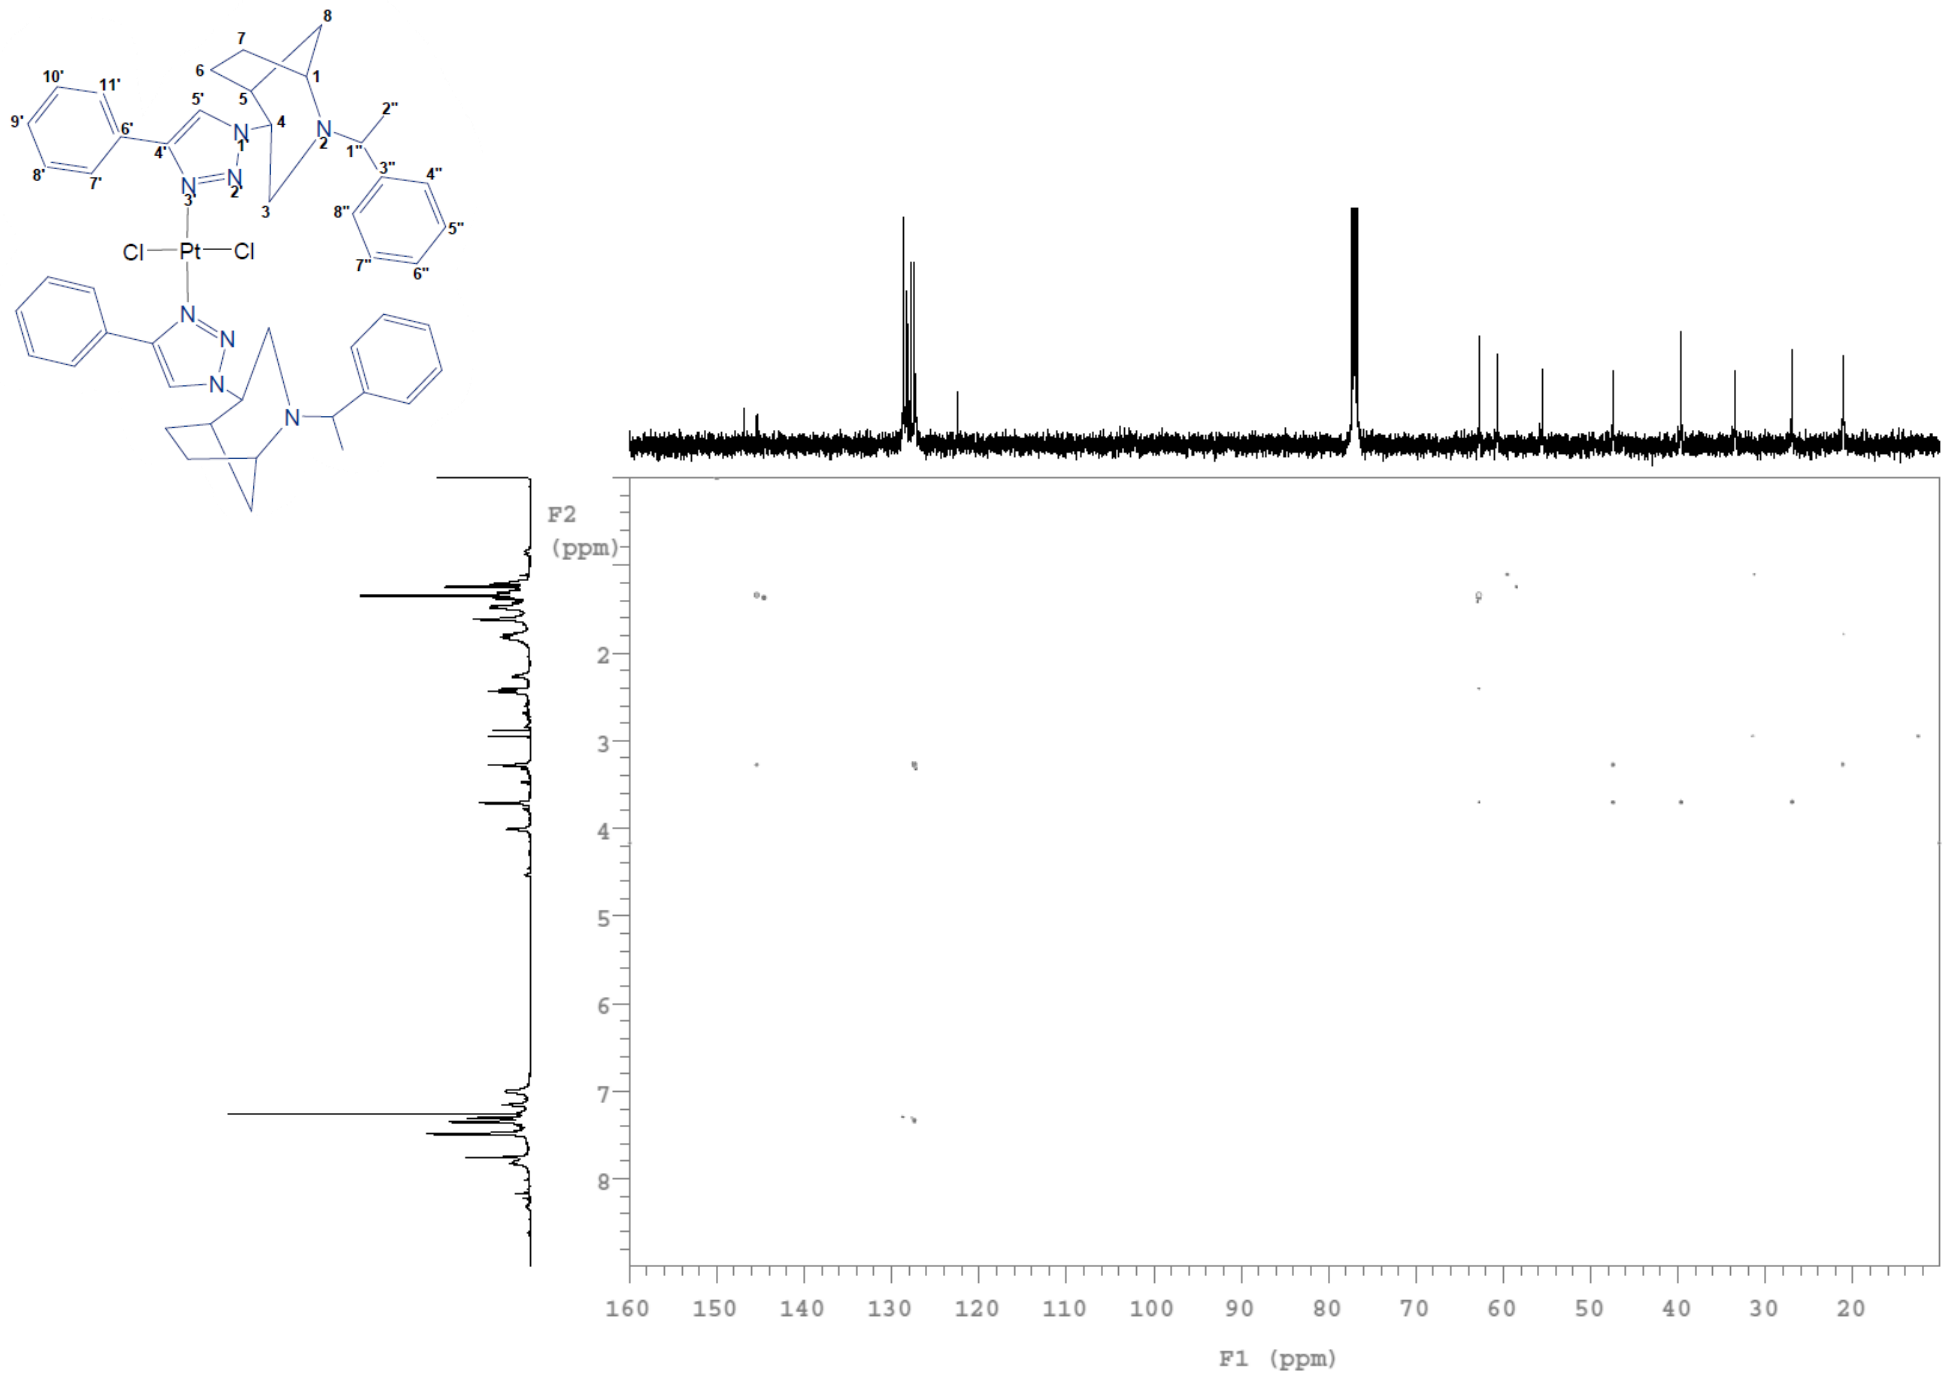

Figure S3d. <sup>1</sup>H-<sup>13</sup>C HMBC NMR spectrum of the complex *trans*-[PtCl<sub>2</sub>L<sub>2</sub>] (**1**)

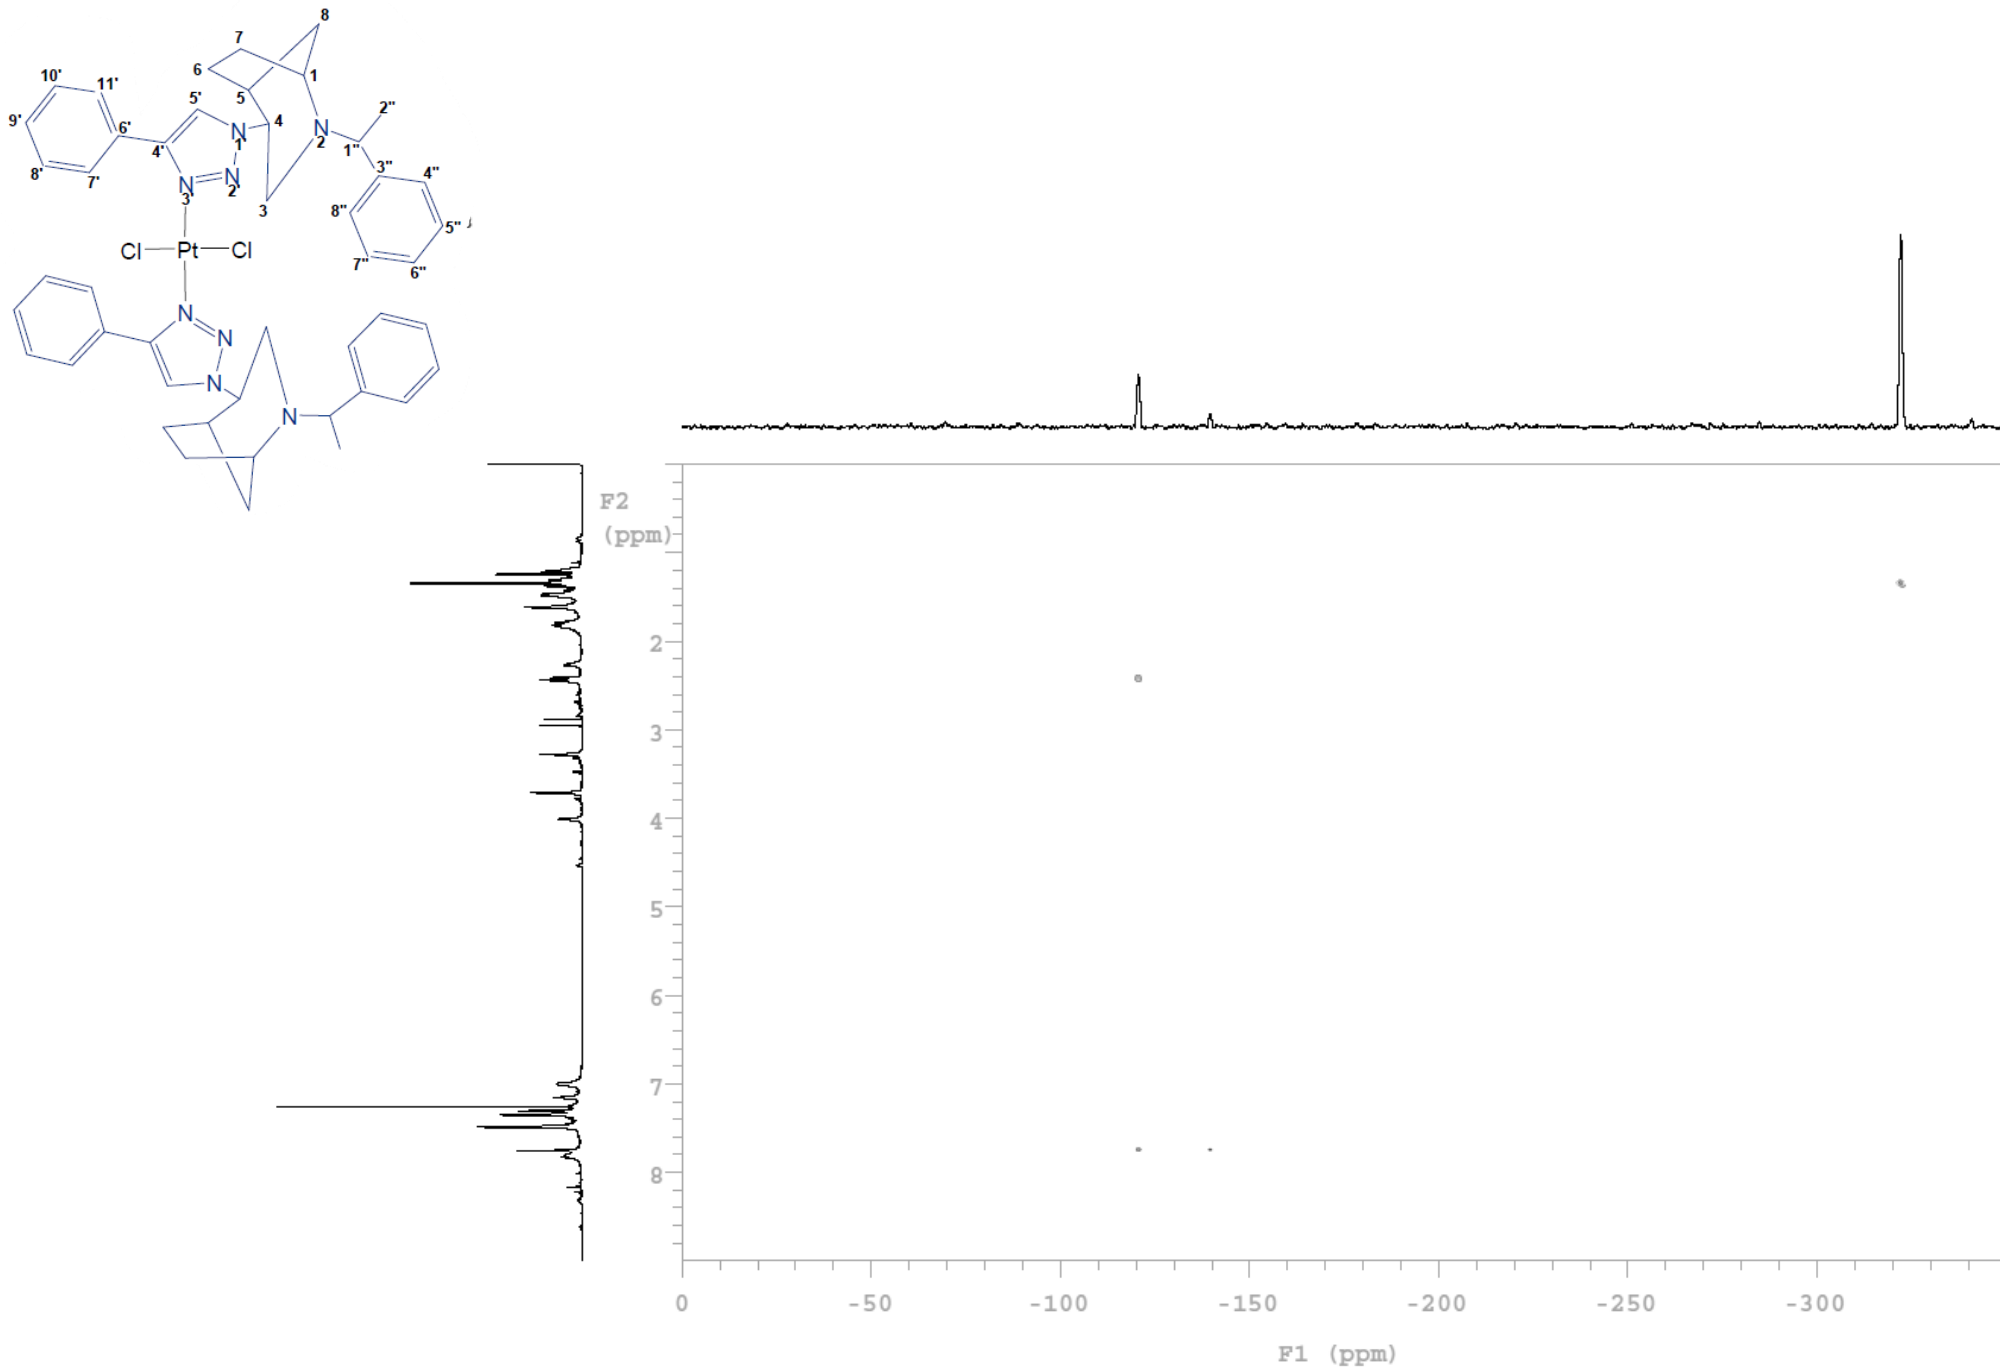

Figure S3e. <sup>1</sup>H-<sup>15</sup>N HMBC NMR spectrum of the complex *trans*-[PtCl<sub>2</sub>L<sub>2</sub>] (**1**)

Figure S3f.  $^{195}\text{Pt}$  NMR spectrum of the complex *trans*-[PtCl<sub>2</sub>L<sub>2</sub>] (**1**)

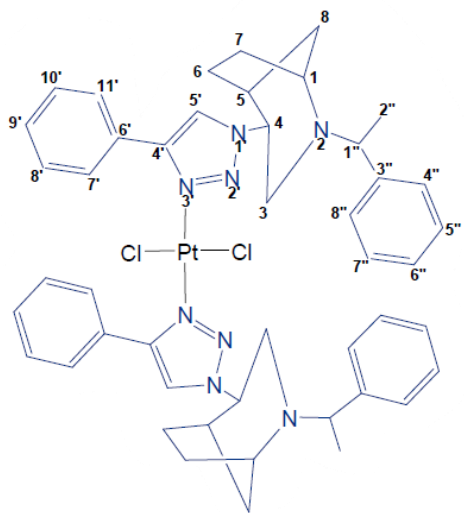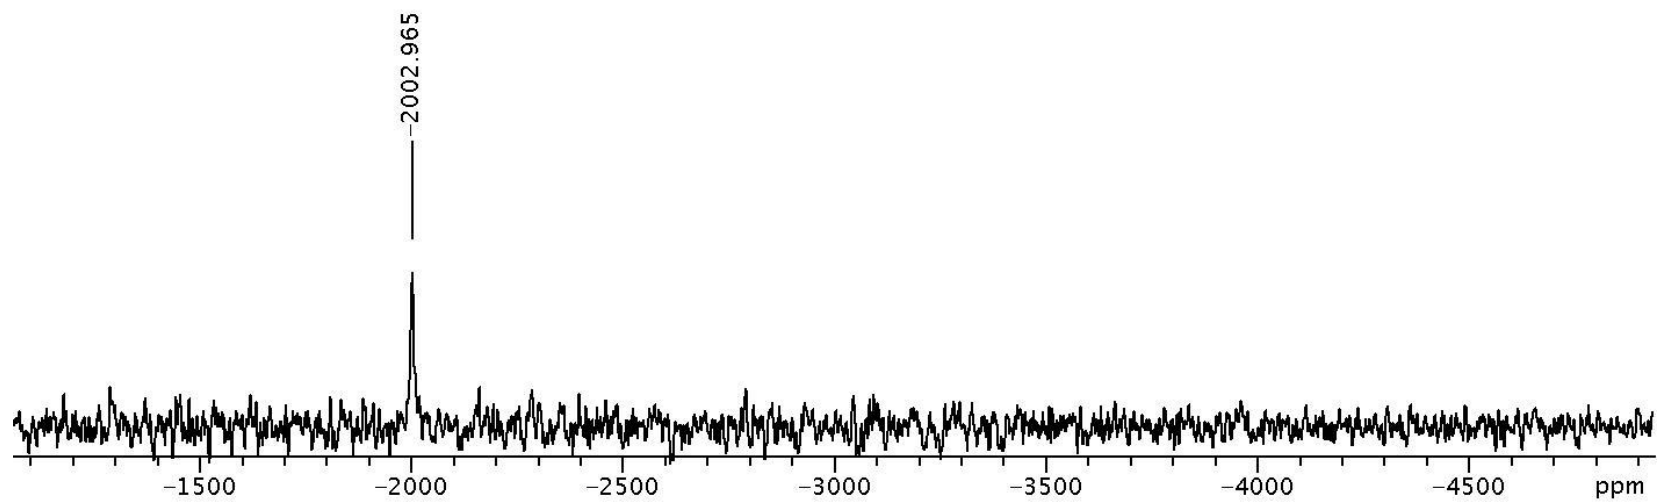

Supplement: d4dt03021d6.pdf [file d4dt03021d6.pdf]
