# Supplementary material for: Unveiling the promising in vitro anticancer activity of lipophilic platinum(ii) complexes containing (1S,4R,5R)-4-(4-phenyl-1H-1,2,3-triazol-1-yl)-2-((S)-1-phenylethyl)-2-azabicyclo[3.2.1]octane: a spectroscopic characterization and DFT calculation
Source: Royal Society of Chemistry journal article supplement (doi:10.1039/d4dt03021d), 2025-01-01

# Spectrum of *cis*-[Pt(DMSO)L(mal)] (3)

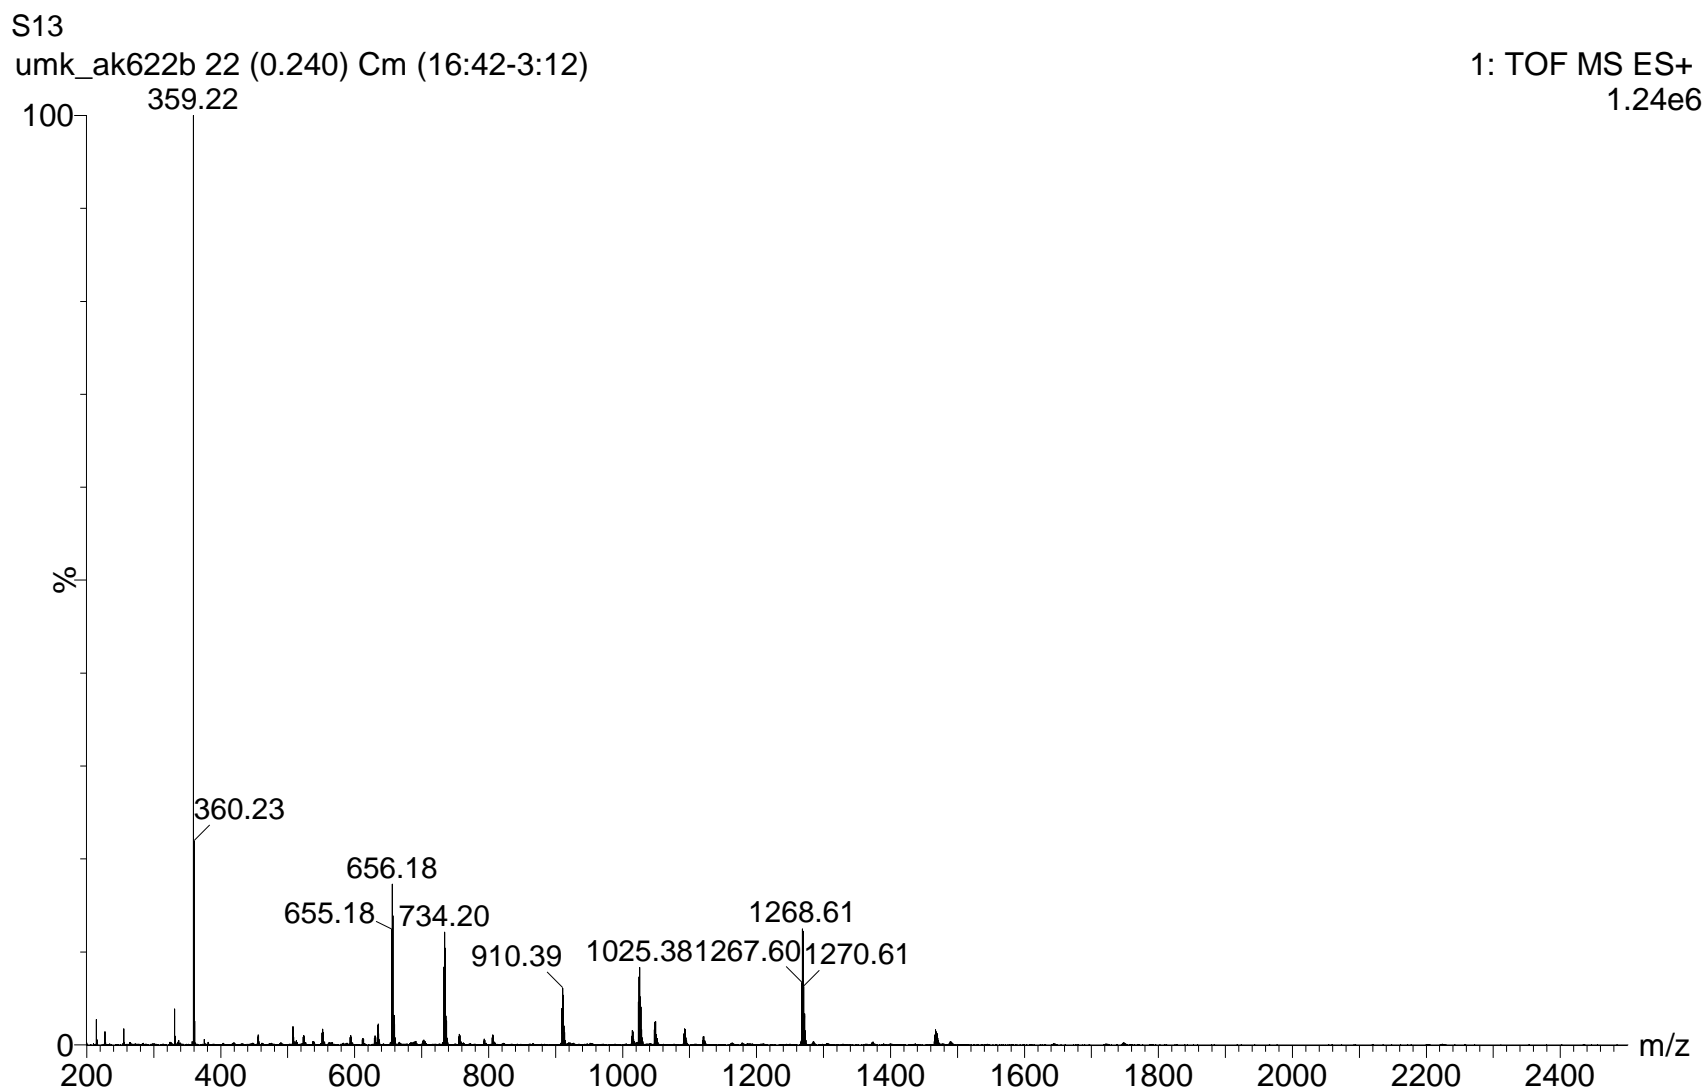

# Spectrum of *cis*-[Pt(DMSO)L(mal)] (3)

S13

umk\_ak622b 22 (0.240) Cm (16:42-3:12)

1: TOF MS ES+  
1.24e6

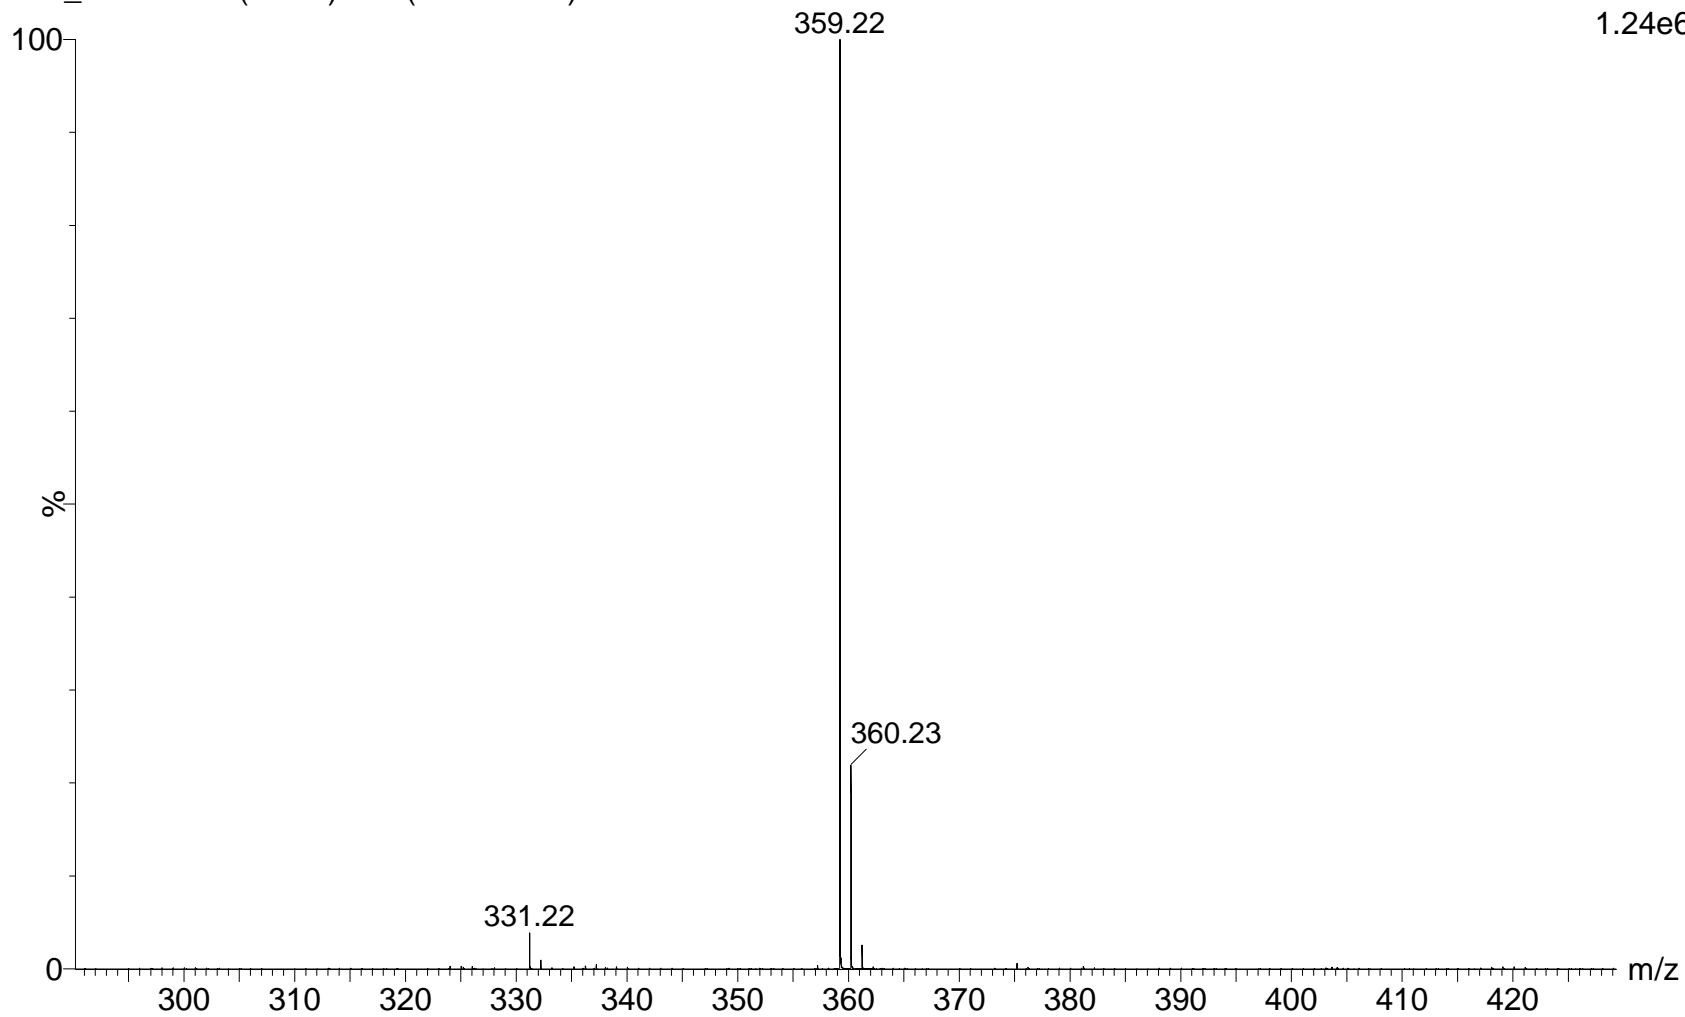

# Spectrum of *cis*-[Pt(DMSO)L(mal)] (3)

S13

umk\_ak622b 22 (0.240) Cm (16:42-3:12)

1: TOF MS ES+

2.79e4

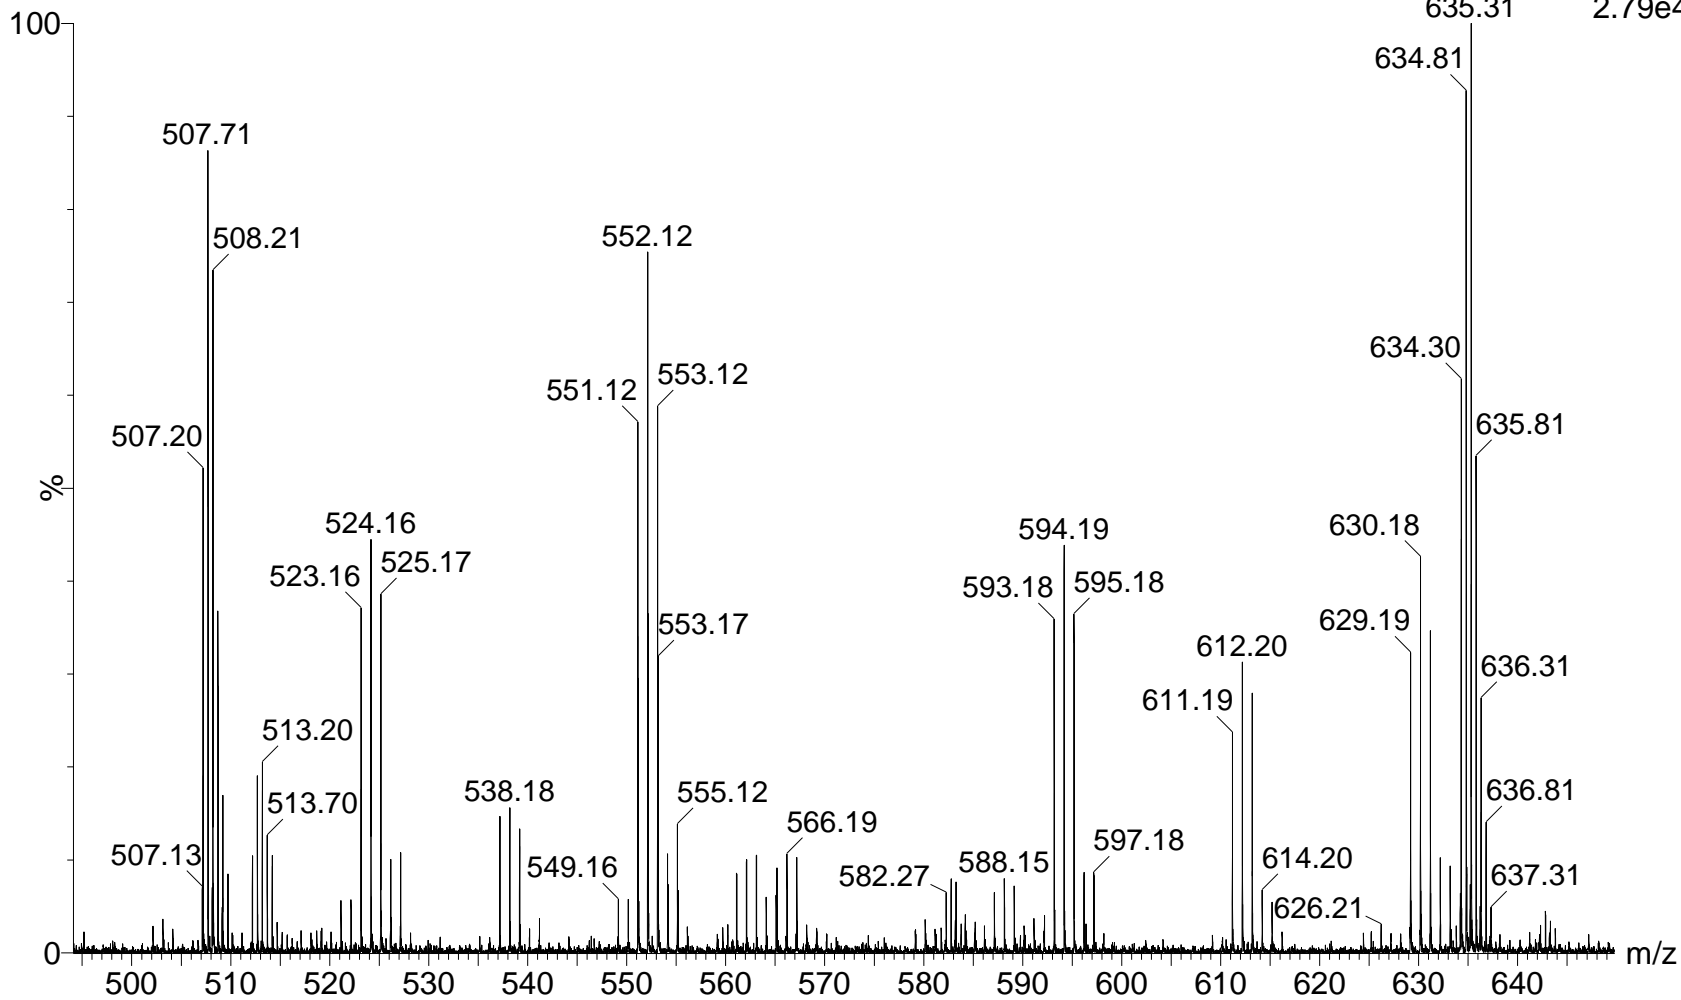

# Spectrum of *cis*-[Pt(DMSO)L(mal)] (3)

S13

umk\_ak622b 22 (0.240) Cm (16:42-3:12)

1: TOF MS ES+  
2.14e5

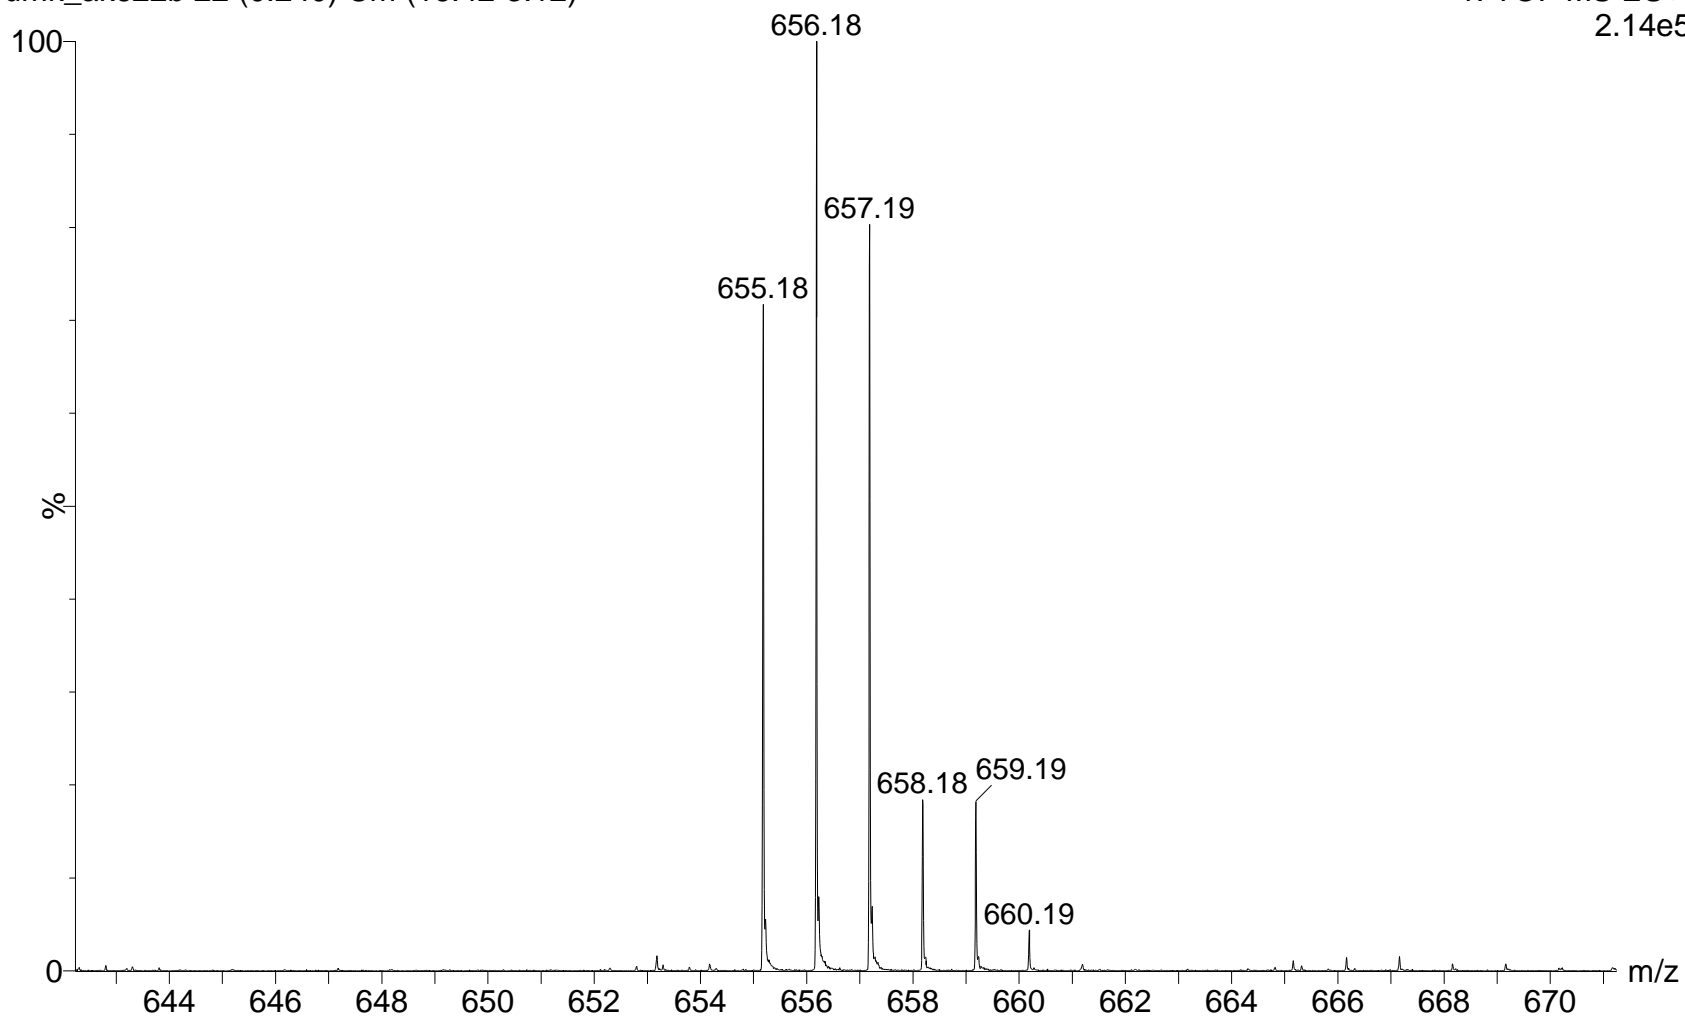

# Spectrum of *cis*-[Pt(DMSO)L(mal)] (3)

S13

umk\_ak622b 22 (0.240) Cm (16:42-3:12)

1: TOF MS ES+  
1.50e5

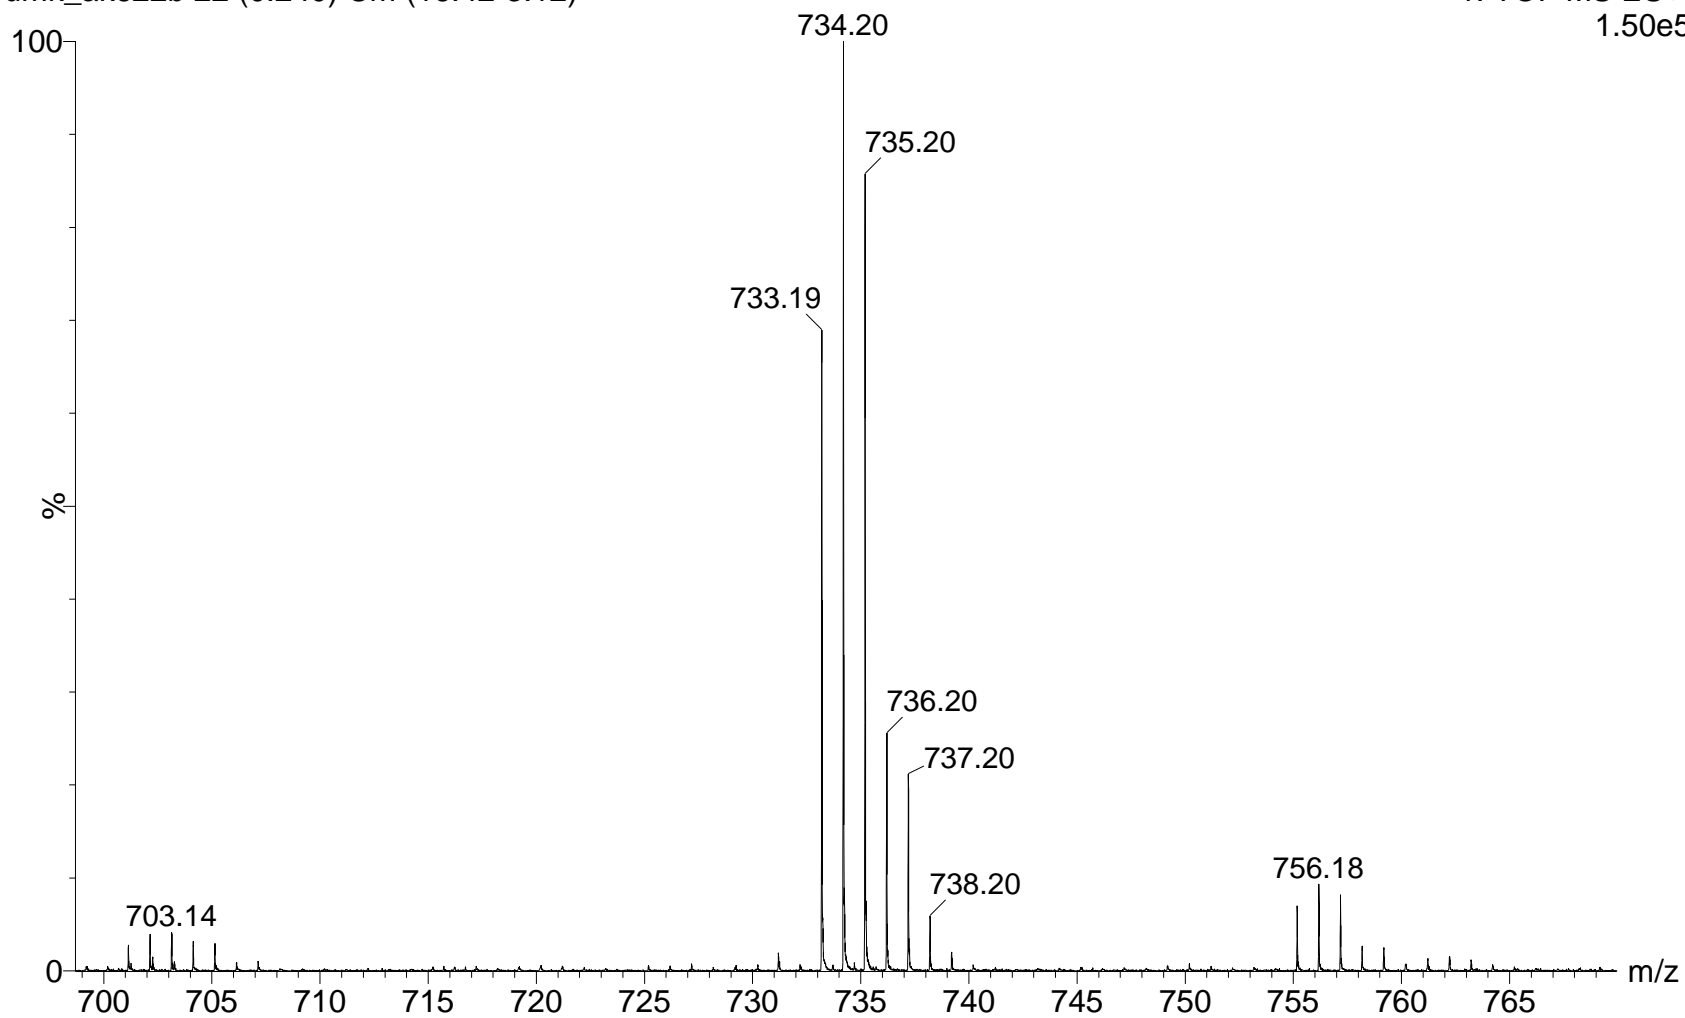

# Spectrum of *cis*-[Pt(DMSO)L(mal)] (3)

S13

umk\_ak622b 22 (0.240) Cm (16:42-3:12)

1: TOF MS ES+  
1.31e4

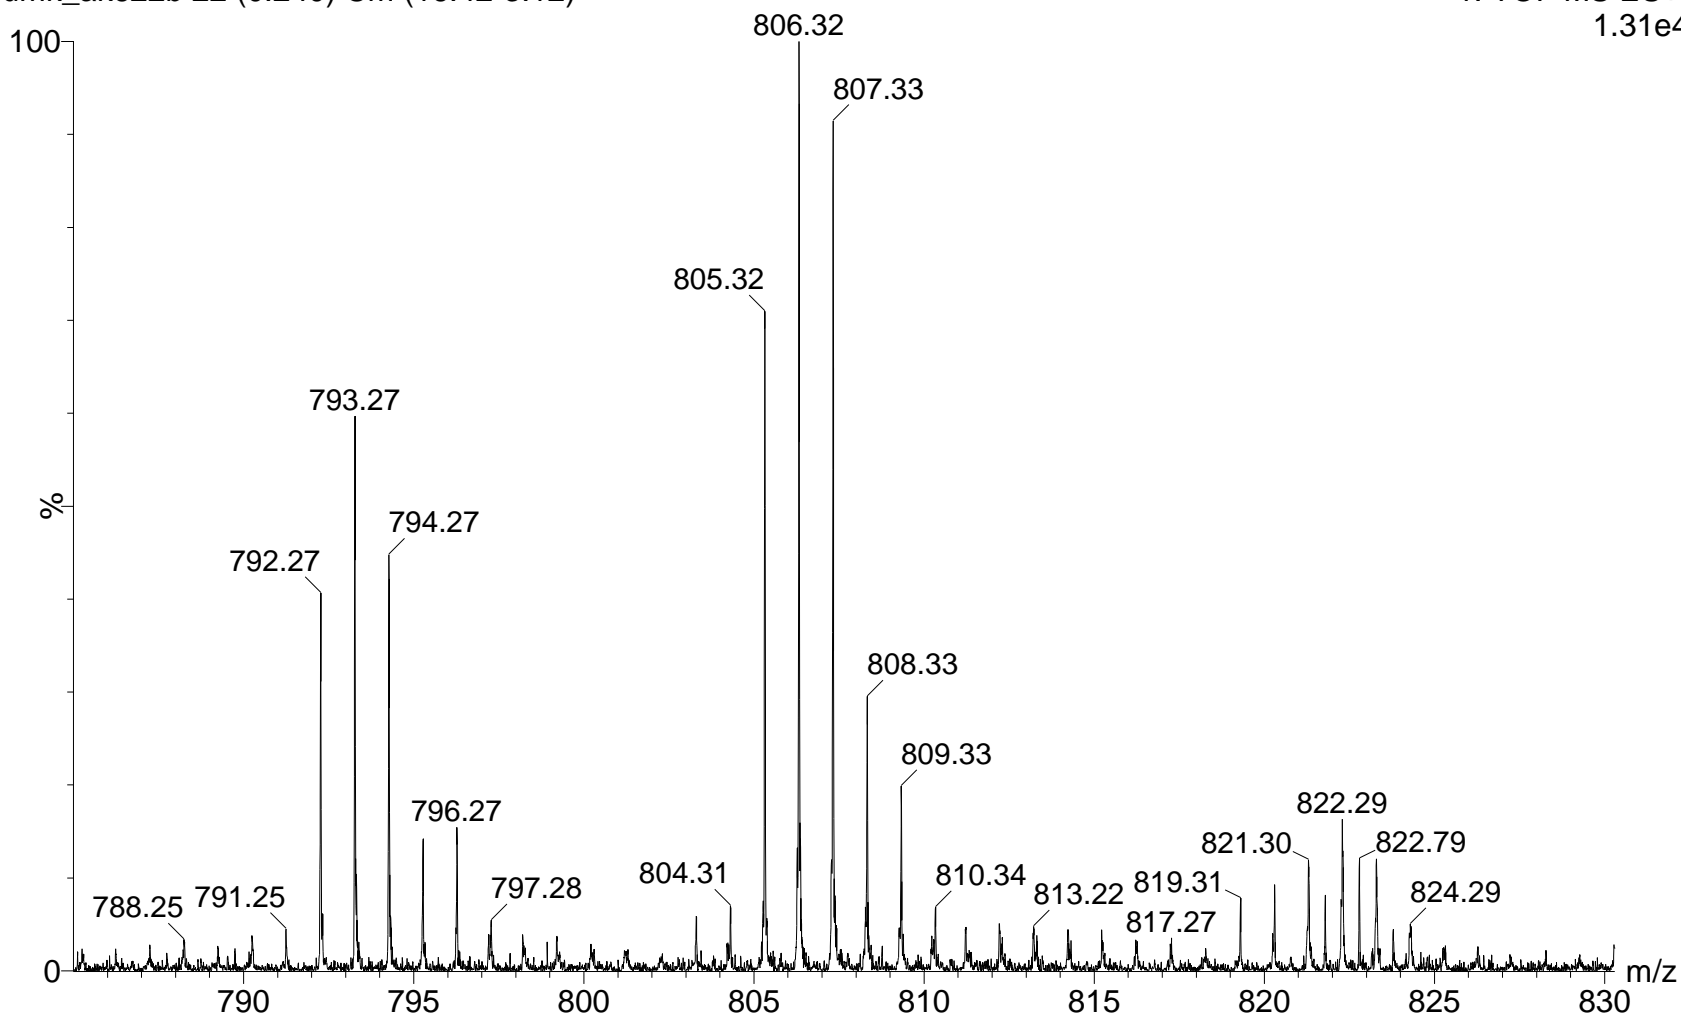

# Spectrum of *cis*-[Pt(DMSO)L(mal)] (3)

S13

umk\_ak622b 22 (0.240) Cm (16:42-3:12)

1: TOF MS ES+  
7.56e4

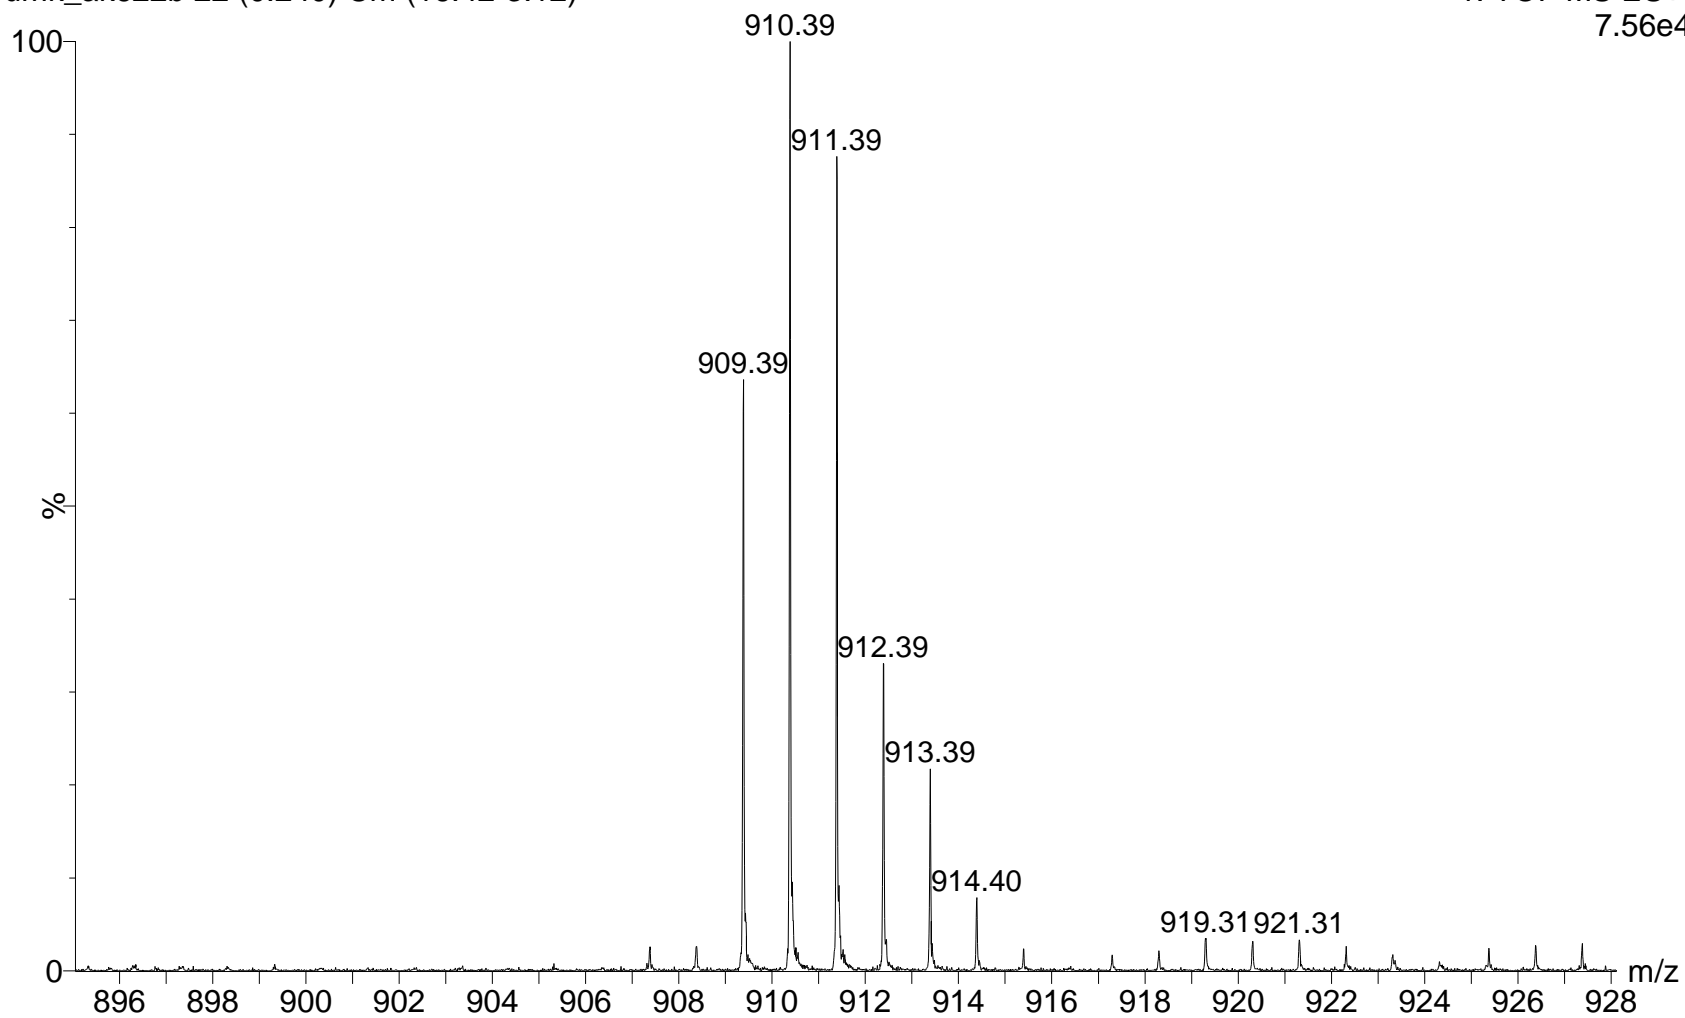

# Spectrum of *cis*-[Pt(DMSO)L(mal)] (3)

S13

umk\_ak622b 22 (0.240) Cm (16:42-3:12)

1: TOF MS ES+  
1.03e5

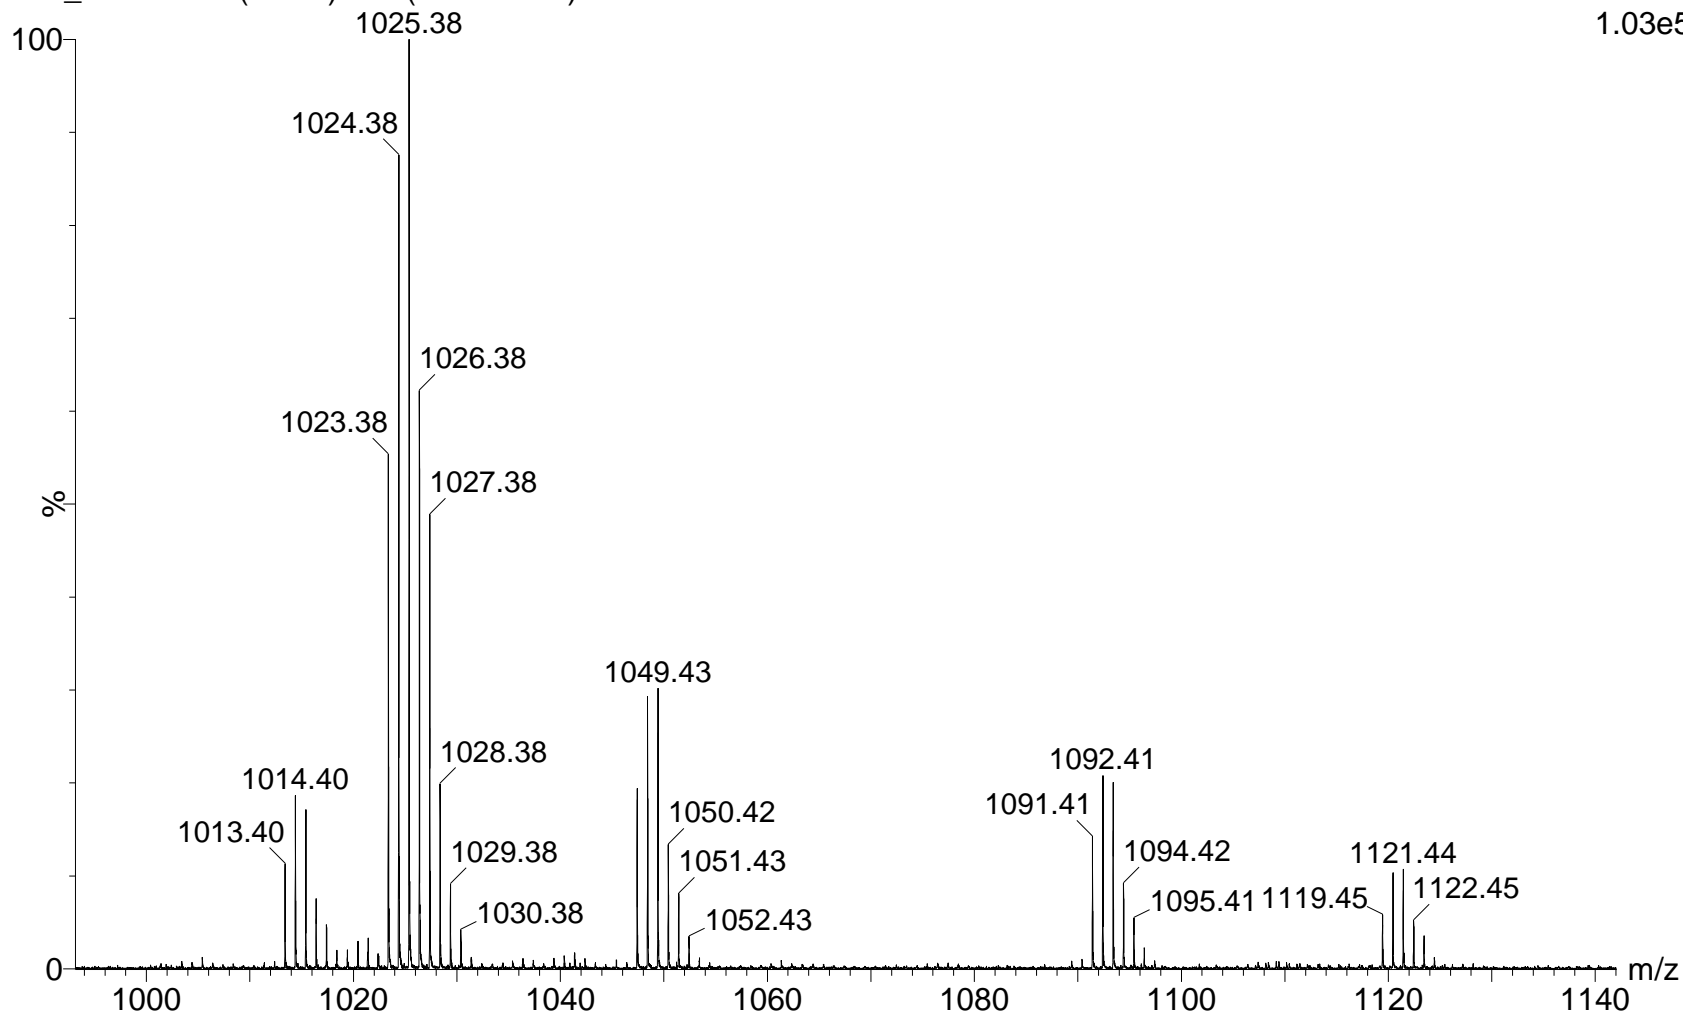



# Spectrum of *cis*-[Pt(DMSO)L(mal)] (3)

S13

umk\_ak622b 22 (0.240) Cm (16:42-3:12)

1: TOF MS ES+  
1.54e5

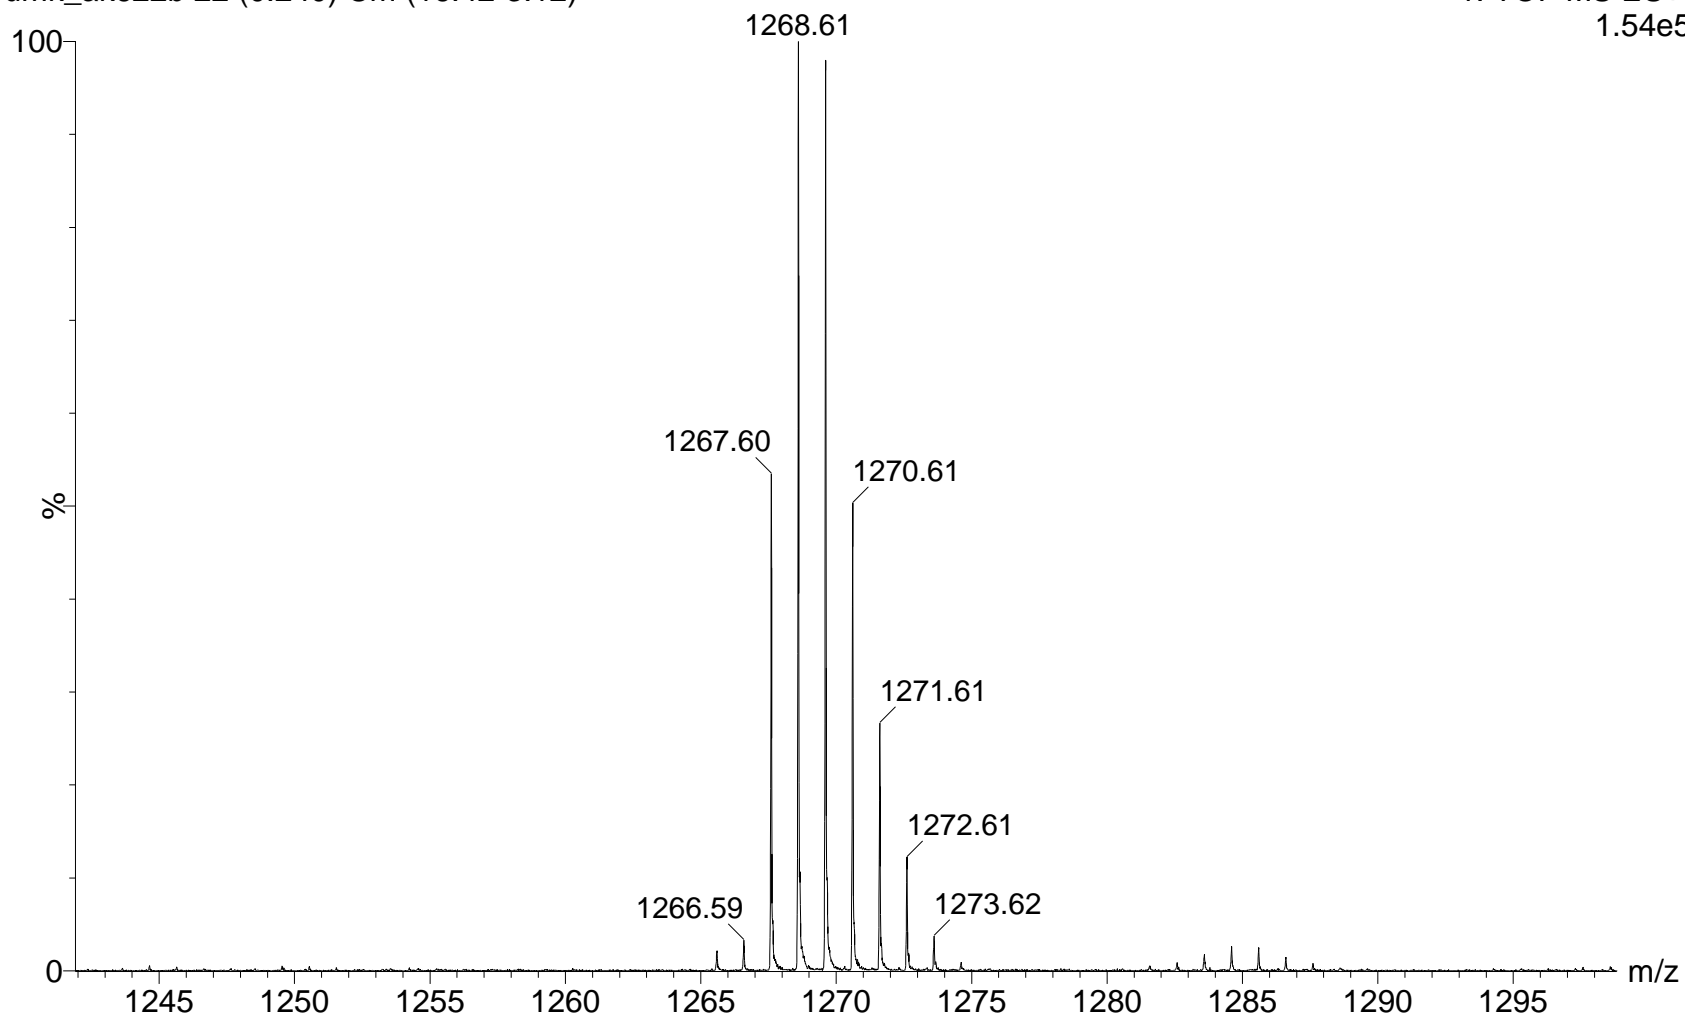

# Spectrum of *cis*-[Pt(DMSO)L(mal)] (3)

S13

umk\_ak622b 22 (0.240) Cm (16:42-3:12)

1: TOF MS ES+  
2.01e4

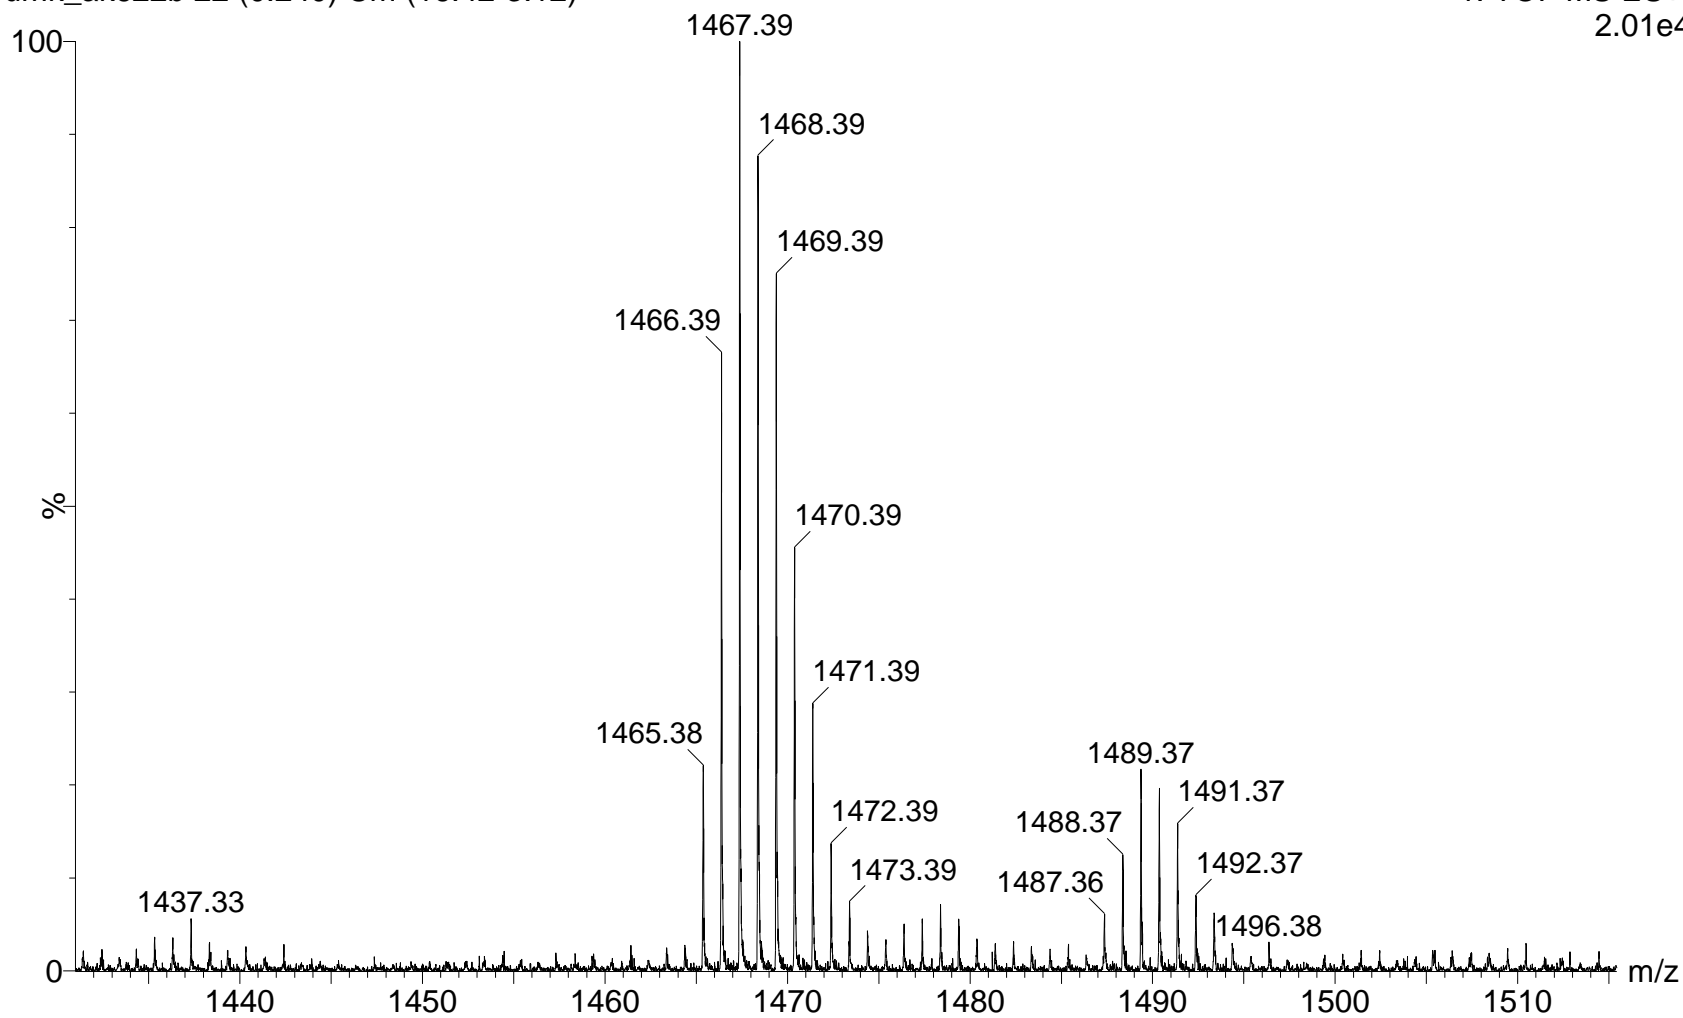

# Spectrum of *cis*-[Pt(DMSO)L(mal)] (3)

S13

umk\_ak622negb 23 (0.248) Cm (16:32-(3:13+80:93))

1: TOF MS ES-  
1.41e5

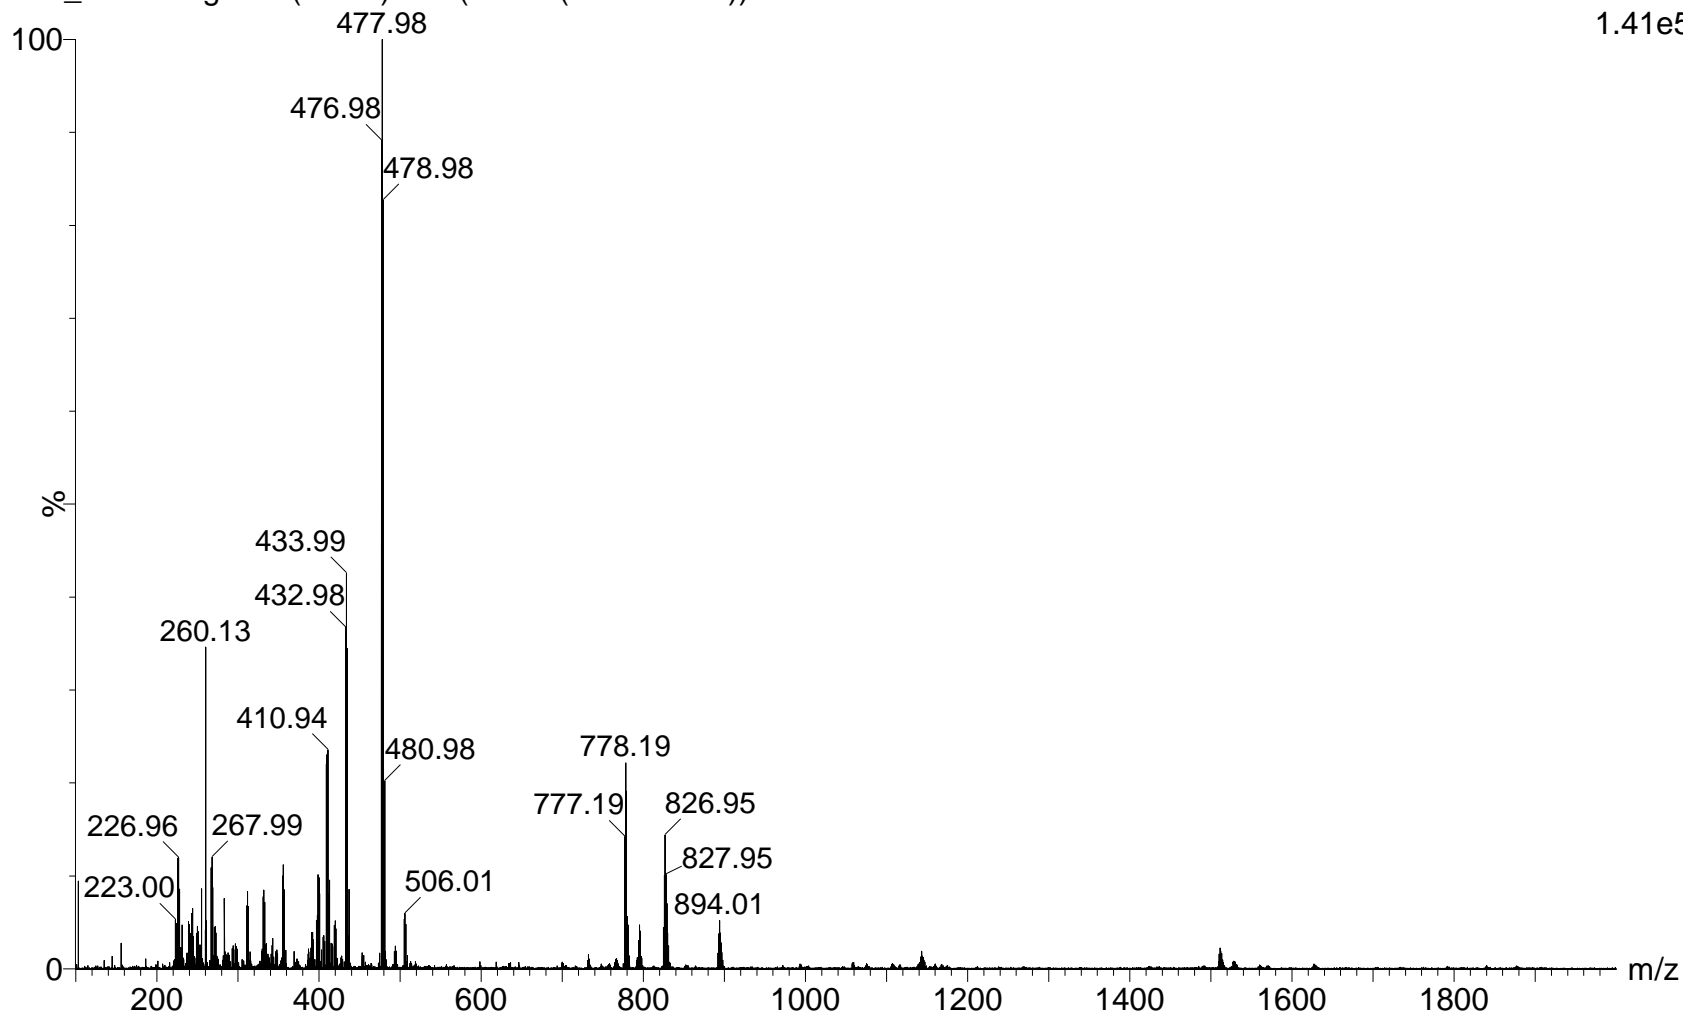

# Spectrum of *cis*-[Pt(DMSO)L(mal)] (3)

S13

umk\_ak622negb 23 (0.248) Cm (16:32-(3:13+80:93))

1: TOF MS ES-  
6.01e4

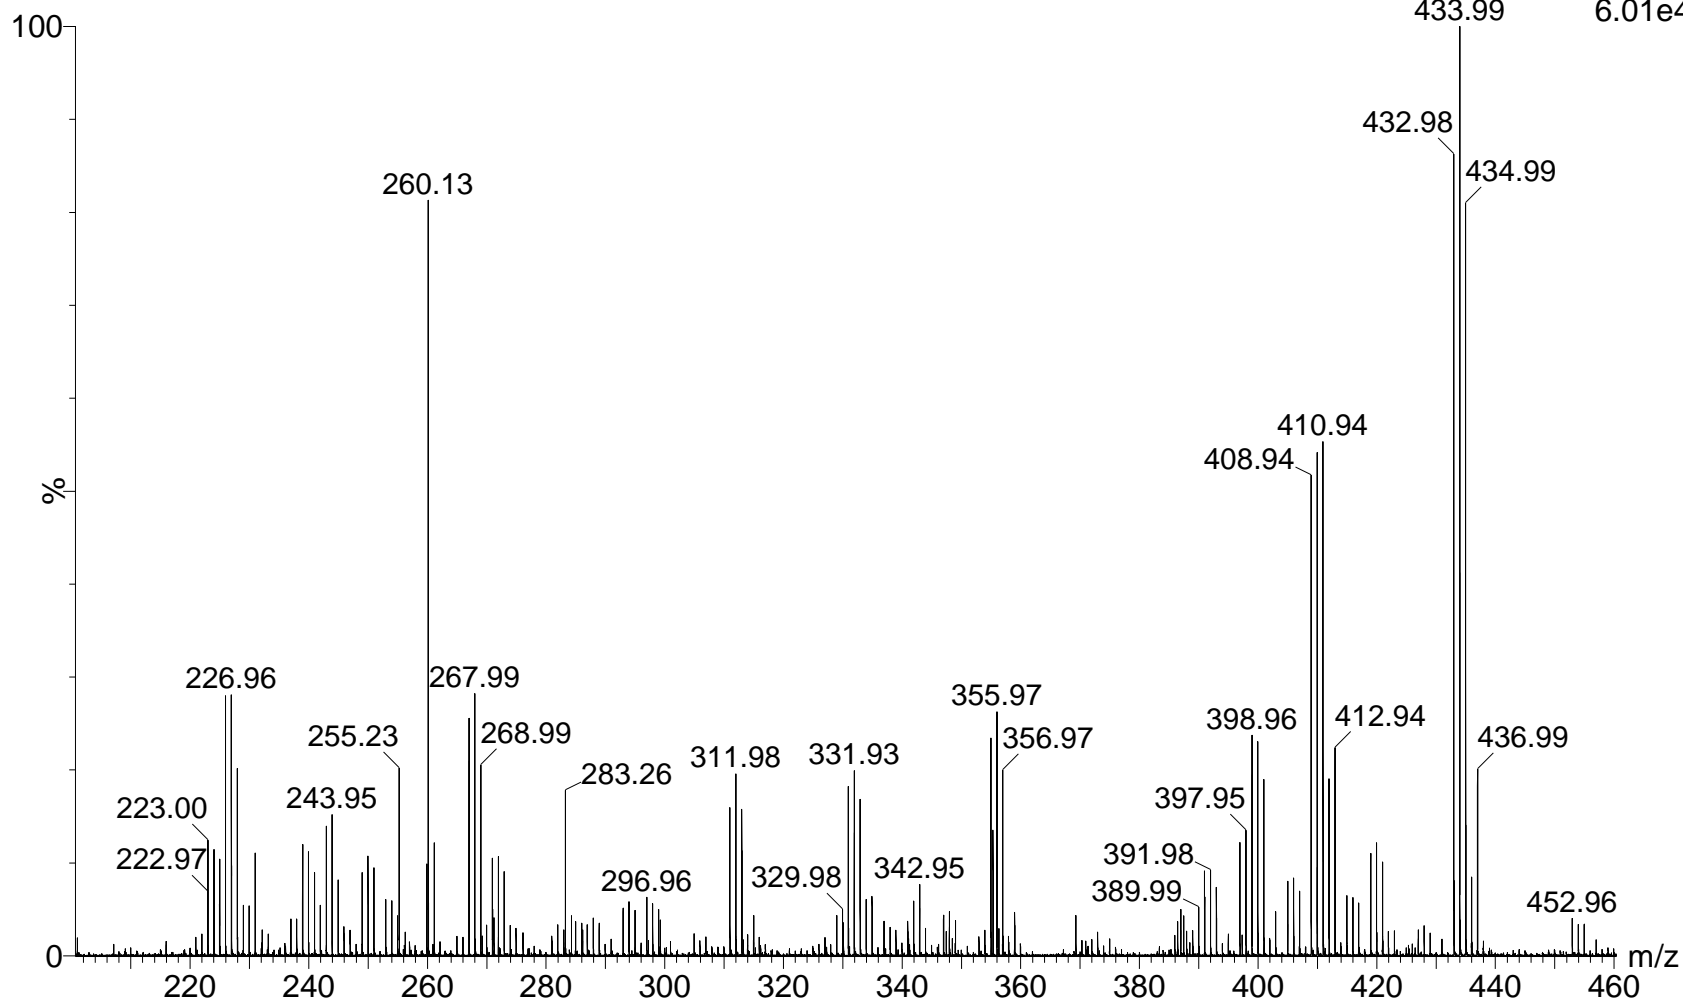

# Spectrum of *cis*-[Pt(DMSO)L(mal)] (3)

S13

umk\_ak622negb 23 (0.248) Cm (16:32-(3:13+80:93))

1: TOF MS ES-  
1.41e5

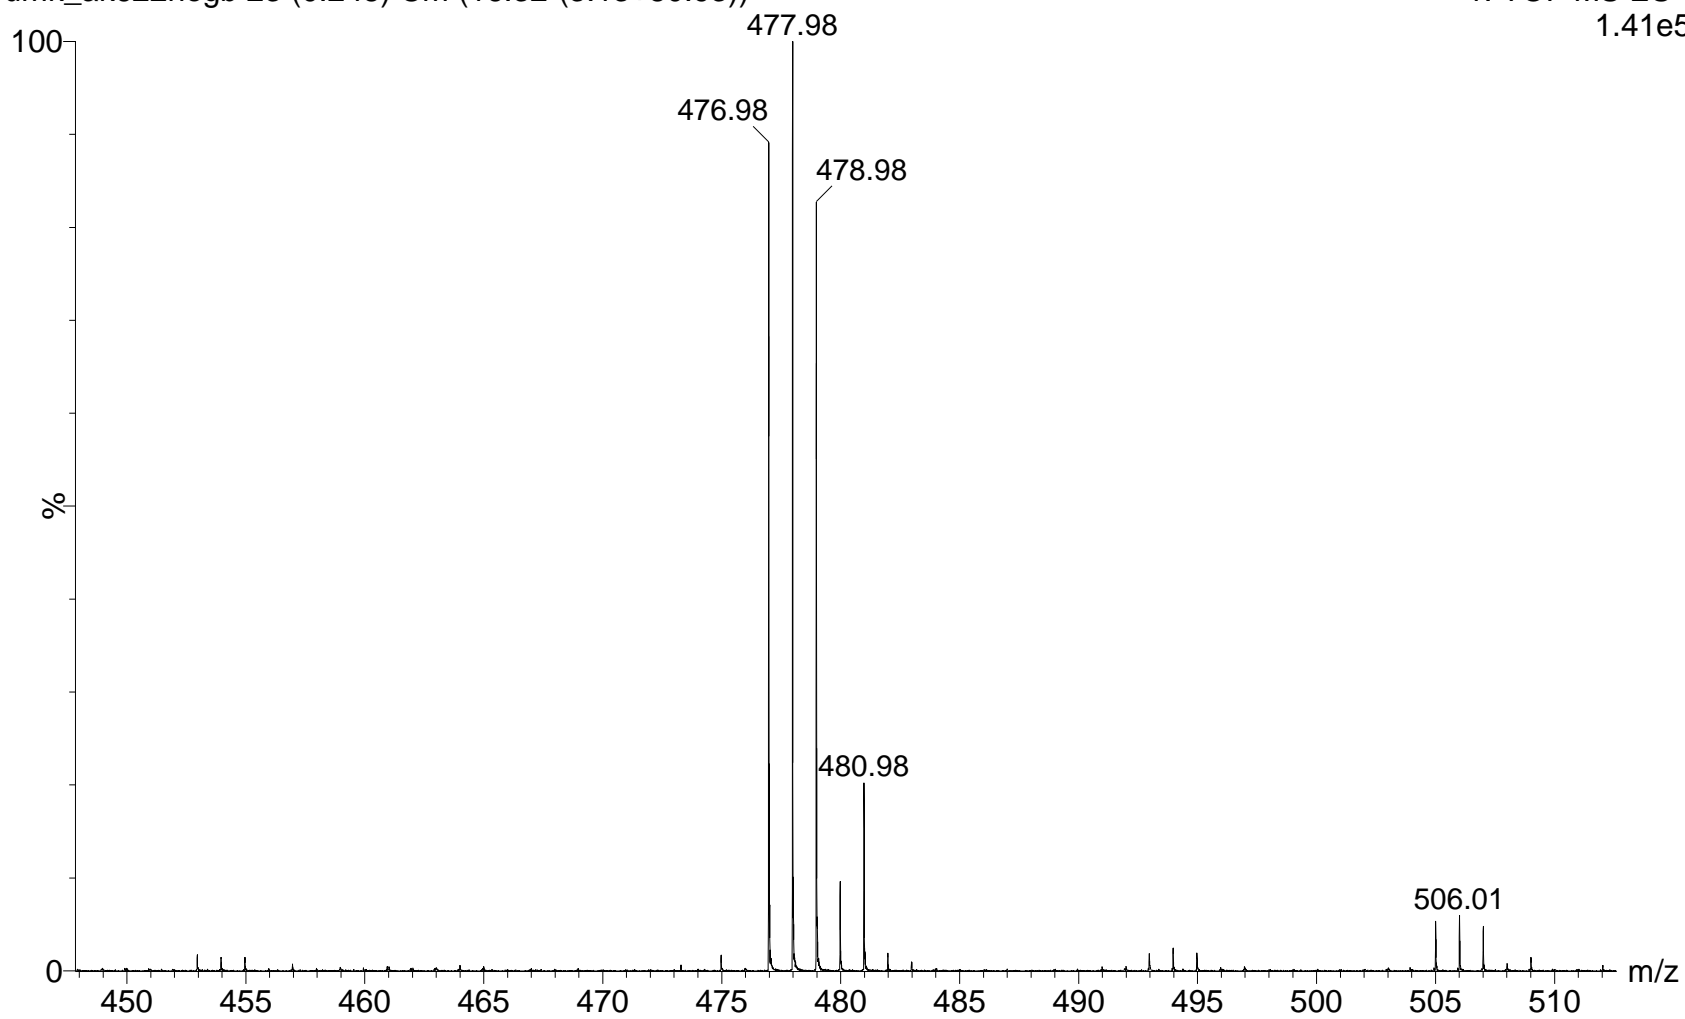

# Spectrum of *cis*-[Pt(DMSO)L(mal)] (3)

S13

umk\_ak622negb 23 (0.248) Cm (16:32-(3:13+80:93))

1: TOF MS ES-  
3.12e4

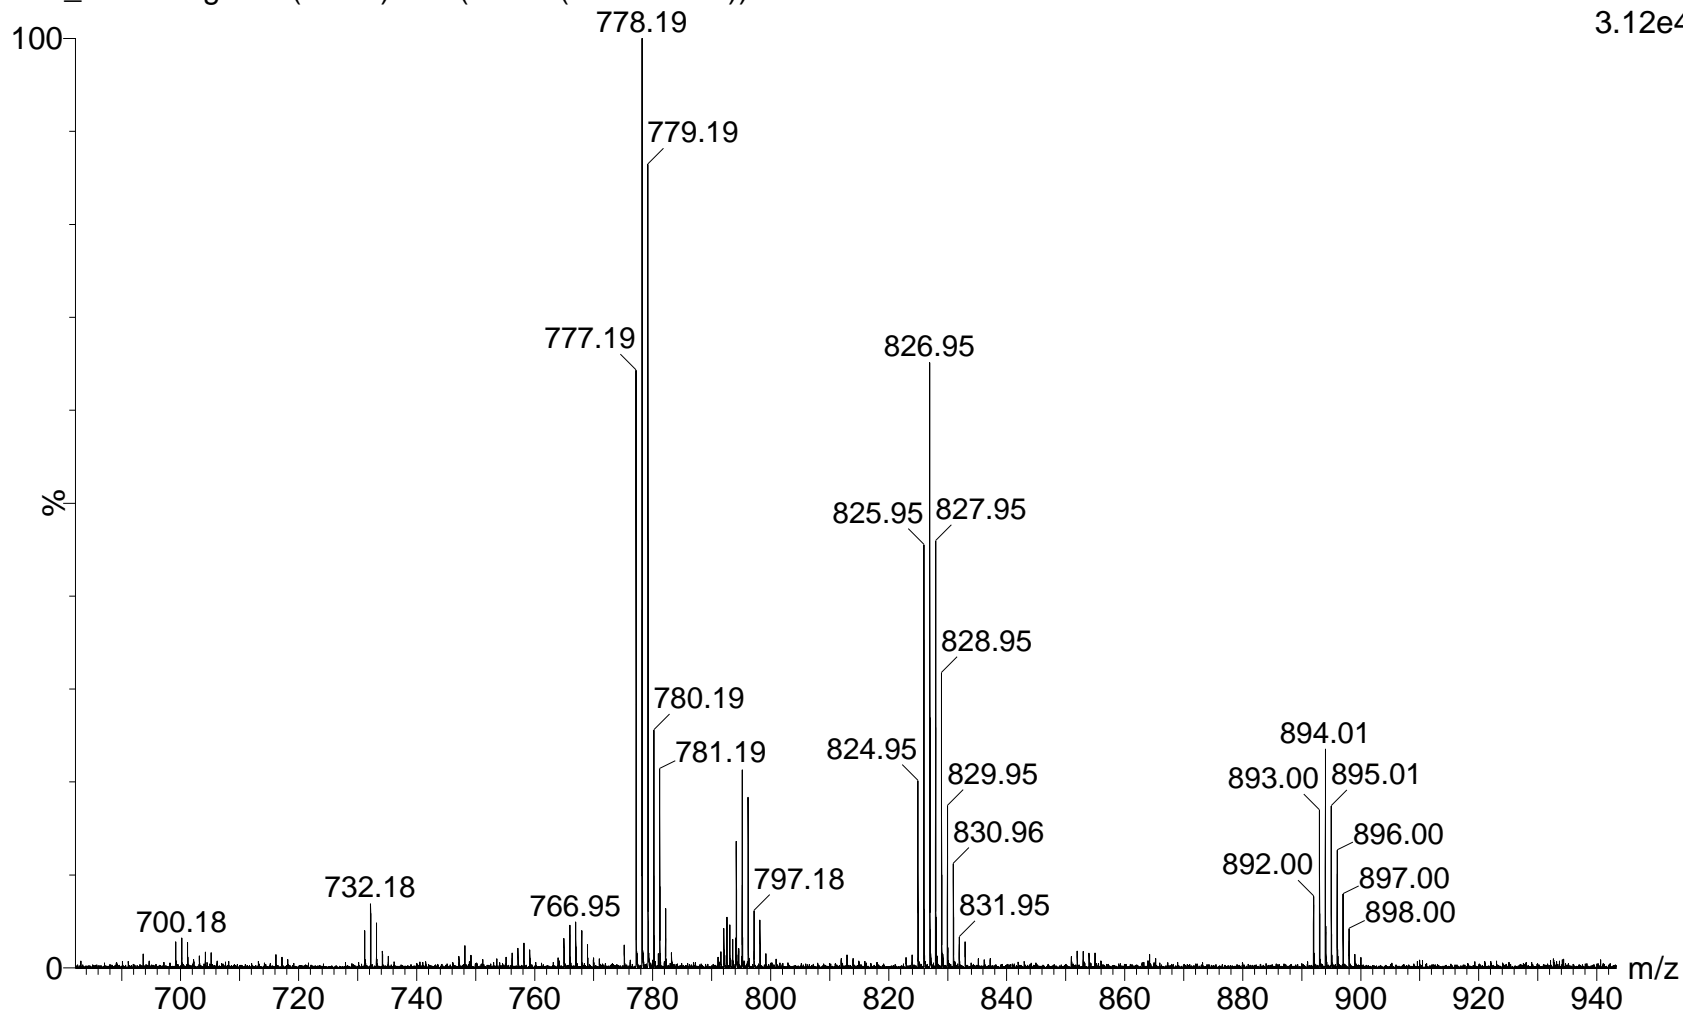

# Spectrum of *cis*-[Pt(DMSO)L(mal)] (3)

S13

umk\_ak622negb 23 (0.248) Cm (16:32-(3:13+80:93))

1: TOF MS ES-  
2.69e3

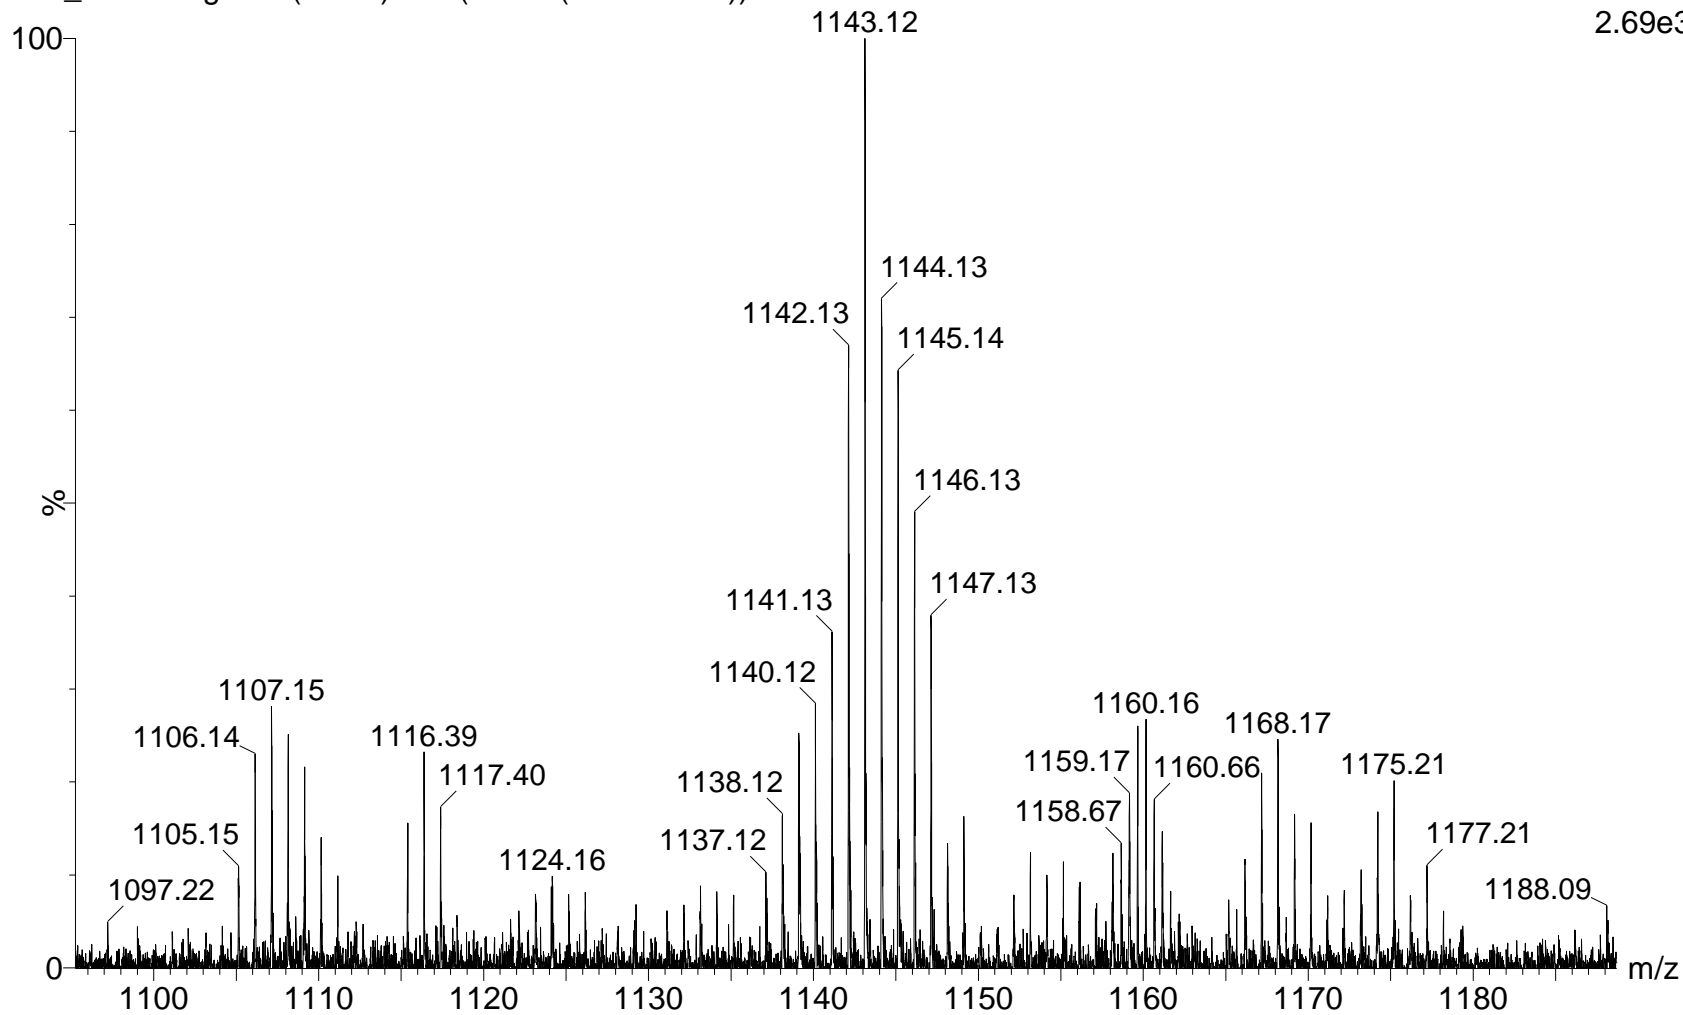

# Spectrum of *cis*-[Pt(DMSO)L(mal)] (3)

S13

umk\_ak622negb 23 (0.248) Cm (16:32-(3:13+80:93))

1: TOF MS ES-  
3.13e3

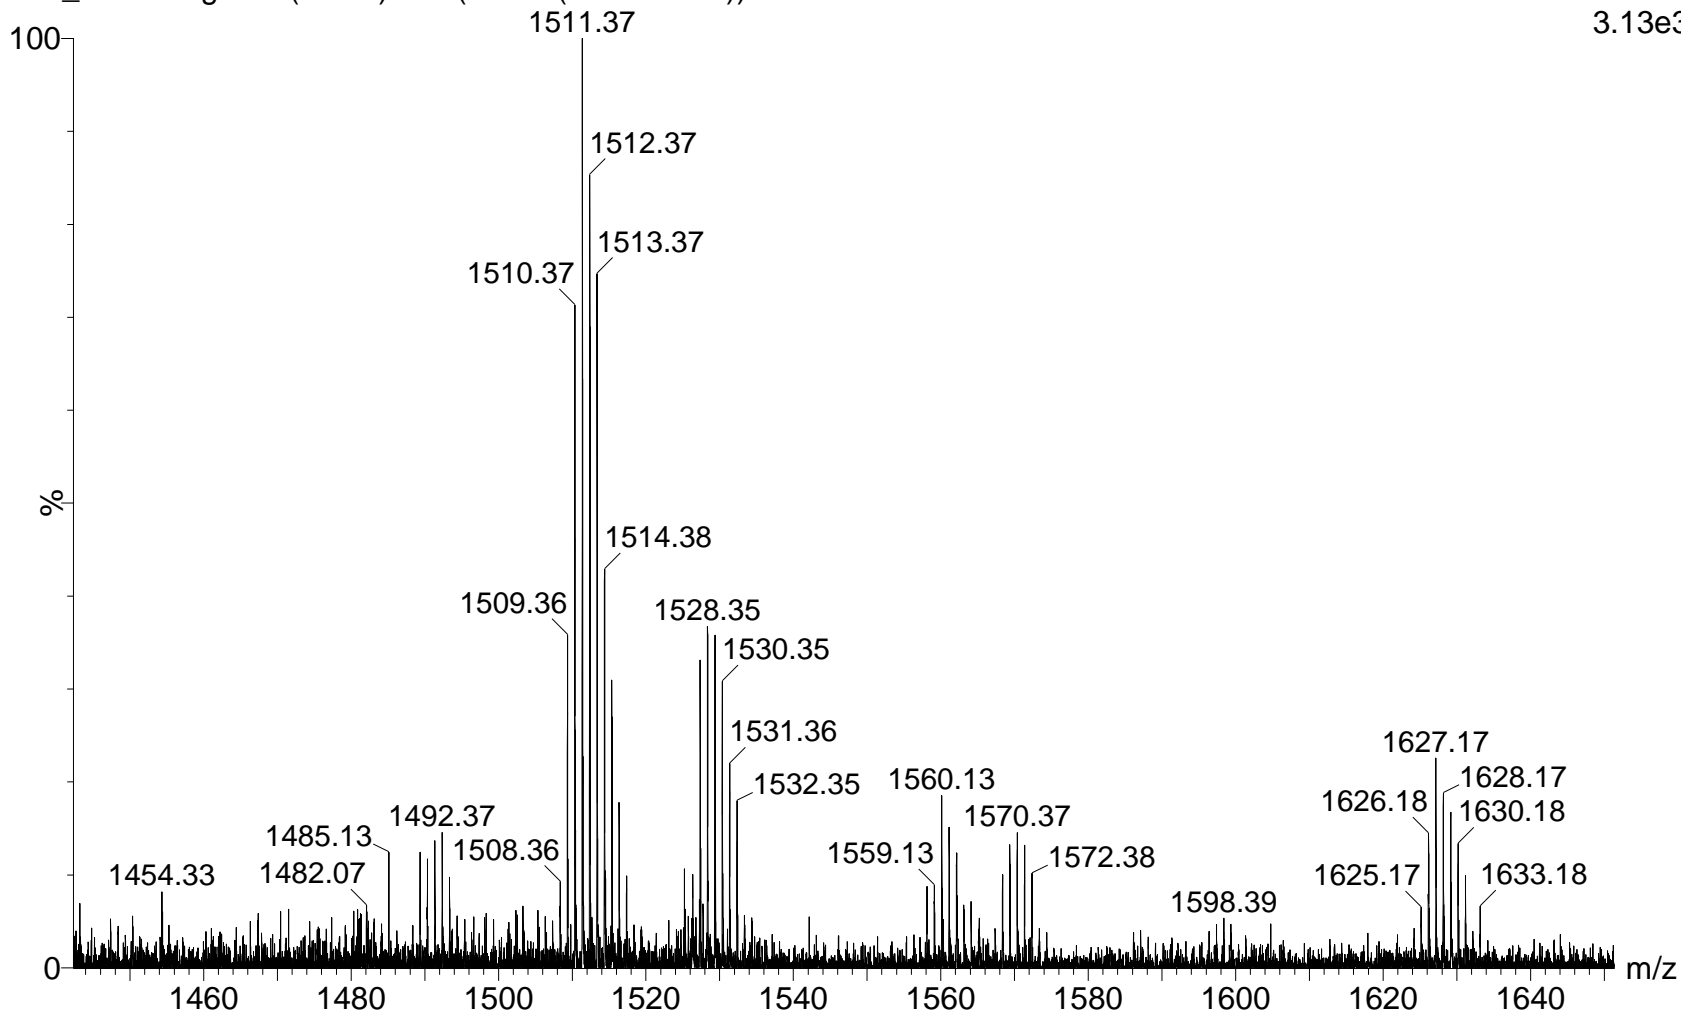

Supplement: d4dt03021d11.pdf [file d4dt03021d11.pdf]
