# Supplementary material for: Unveiling the promising in vitro anticancer activity of lipophilic platinum(ii) complexes containing (1S,4R,5R)-4-(4-phenyl-1H-1,2,3-triazol-1-yl)-2-((S)-1-phenylethyl)-2-azabicyclo[3.2.1]octane: a spectroscopic characterization and DFT calculation
Source: Royal Society of Chemistry journal article supplement (doi:10.1039/d4dt03021d), 2025-01-01
Supplement: d4dt03021d1.pdf [file d4dt03021d1.pdf]

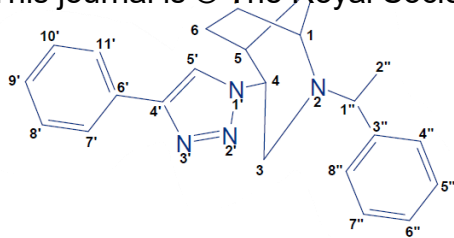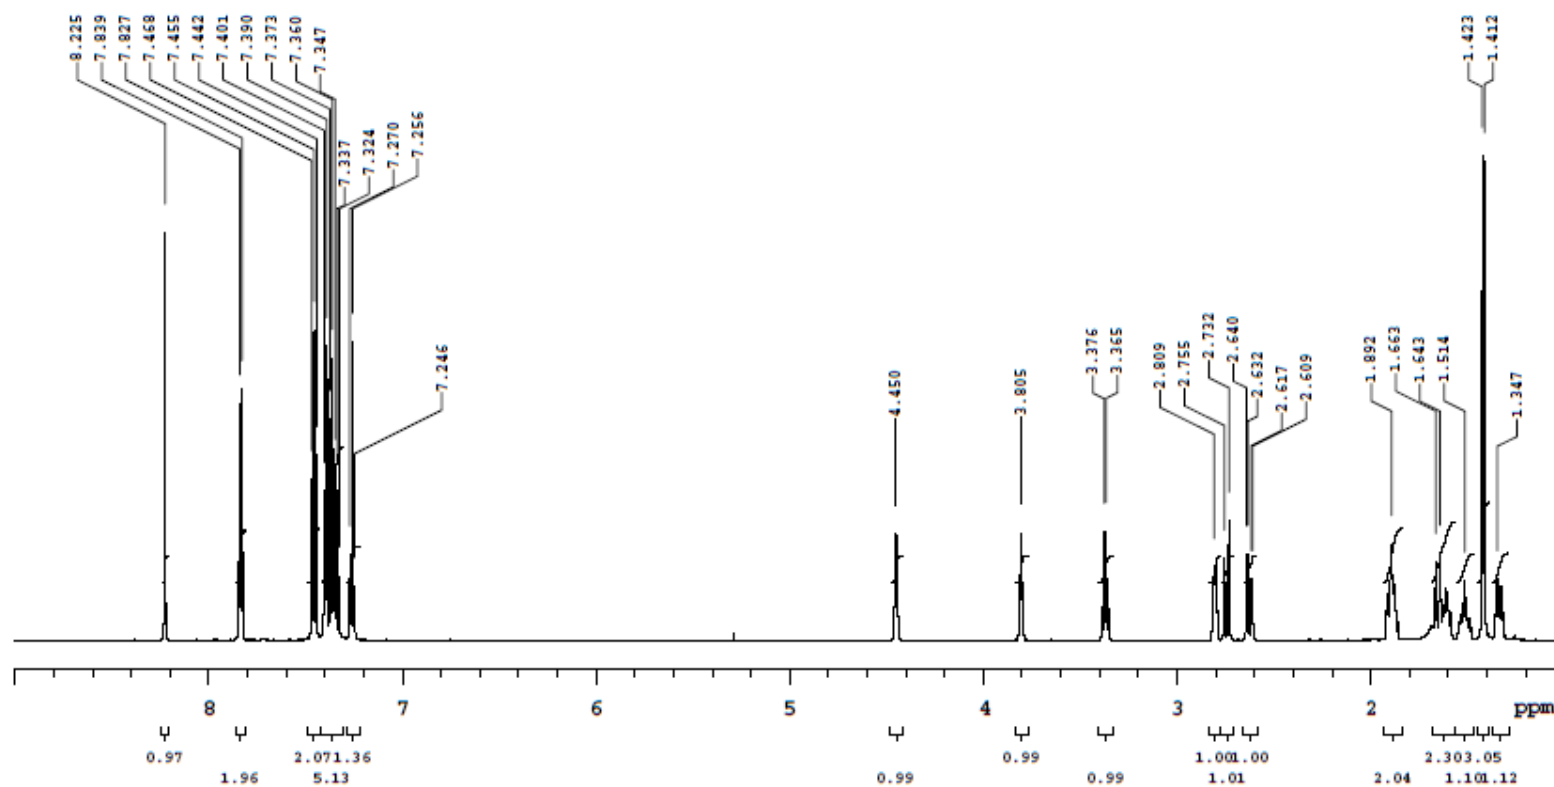

Figure S1a. <sup>1</sup>H NMR spectrum of the ligand (**L**) in CDCl<sub>3</sub>

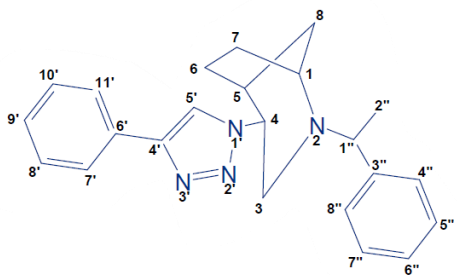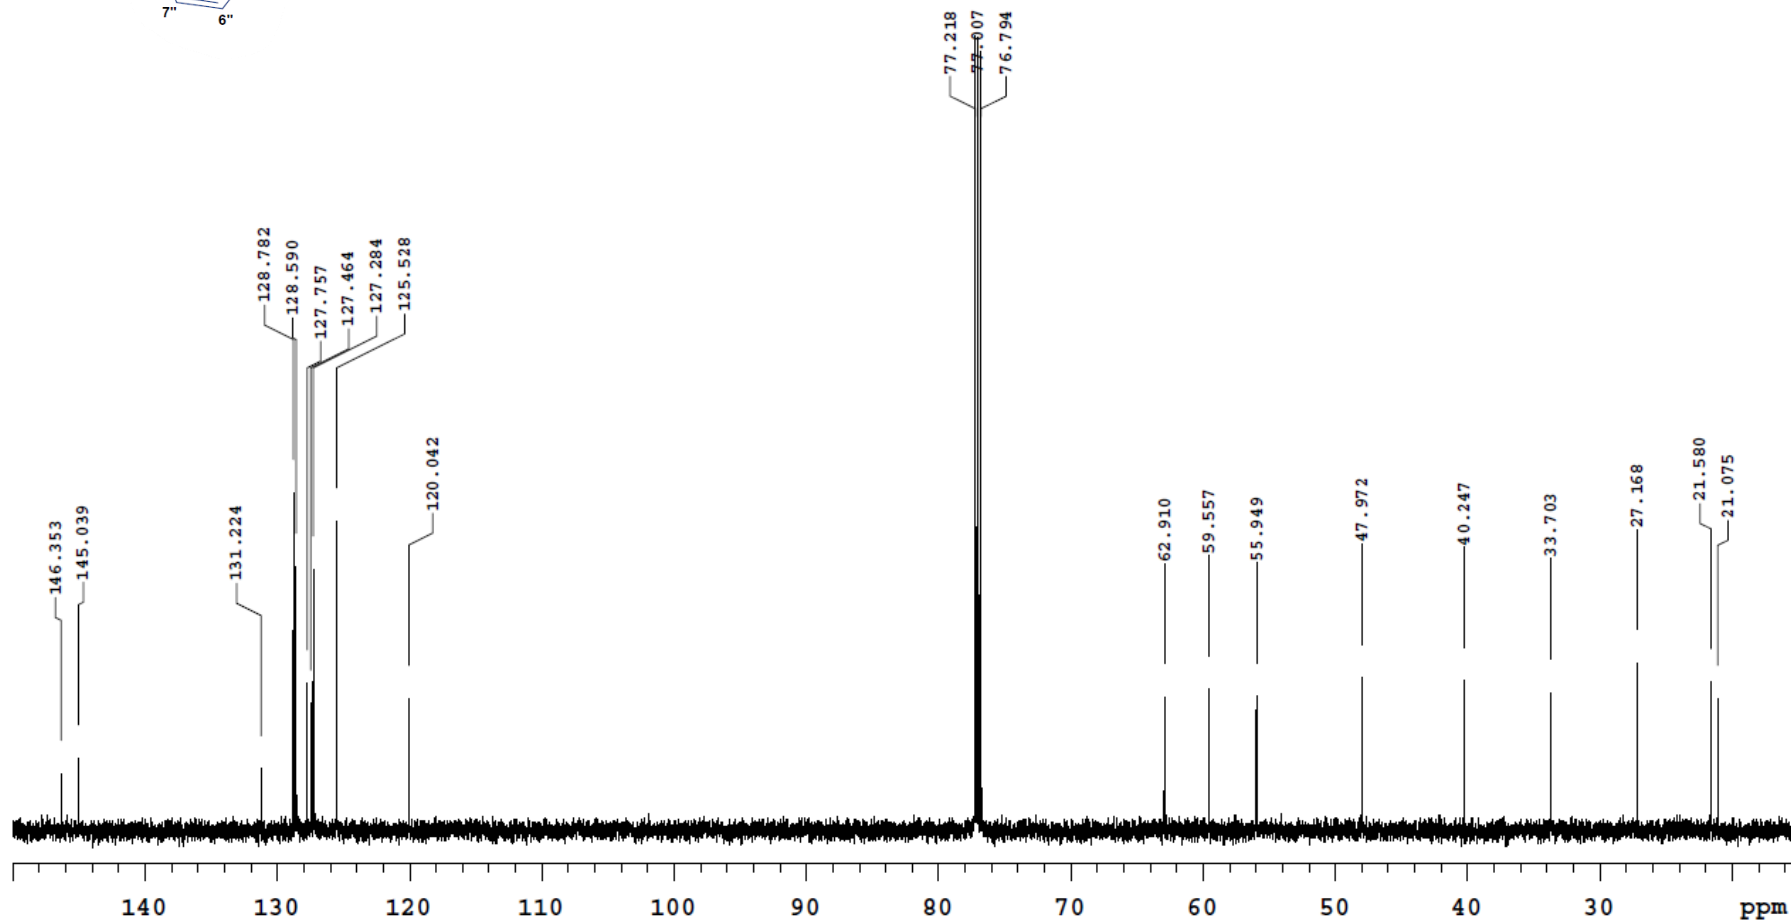

Figure S1b.  $^{13}\text{C}$  NMR spectrum of the ligand (**L**) in  $\text{CDCl}_3$

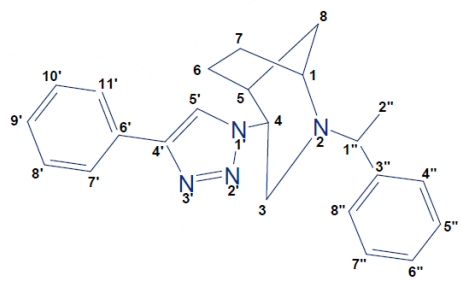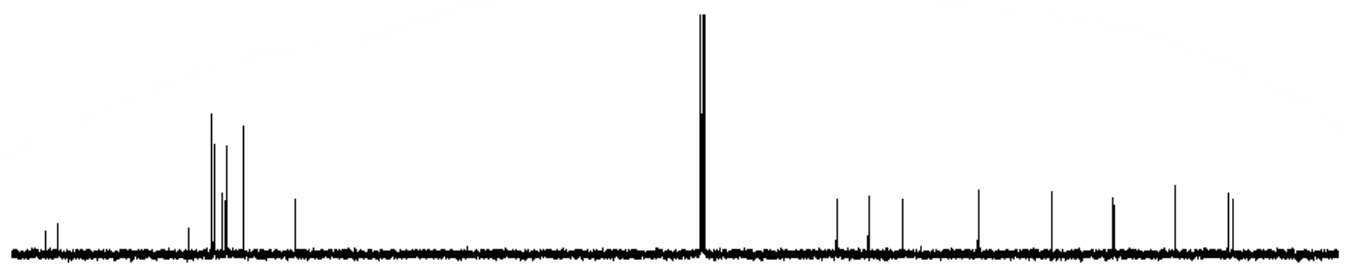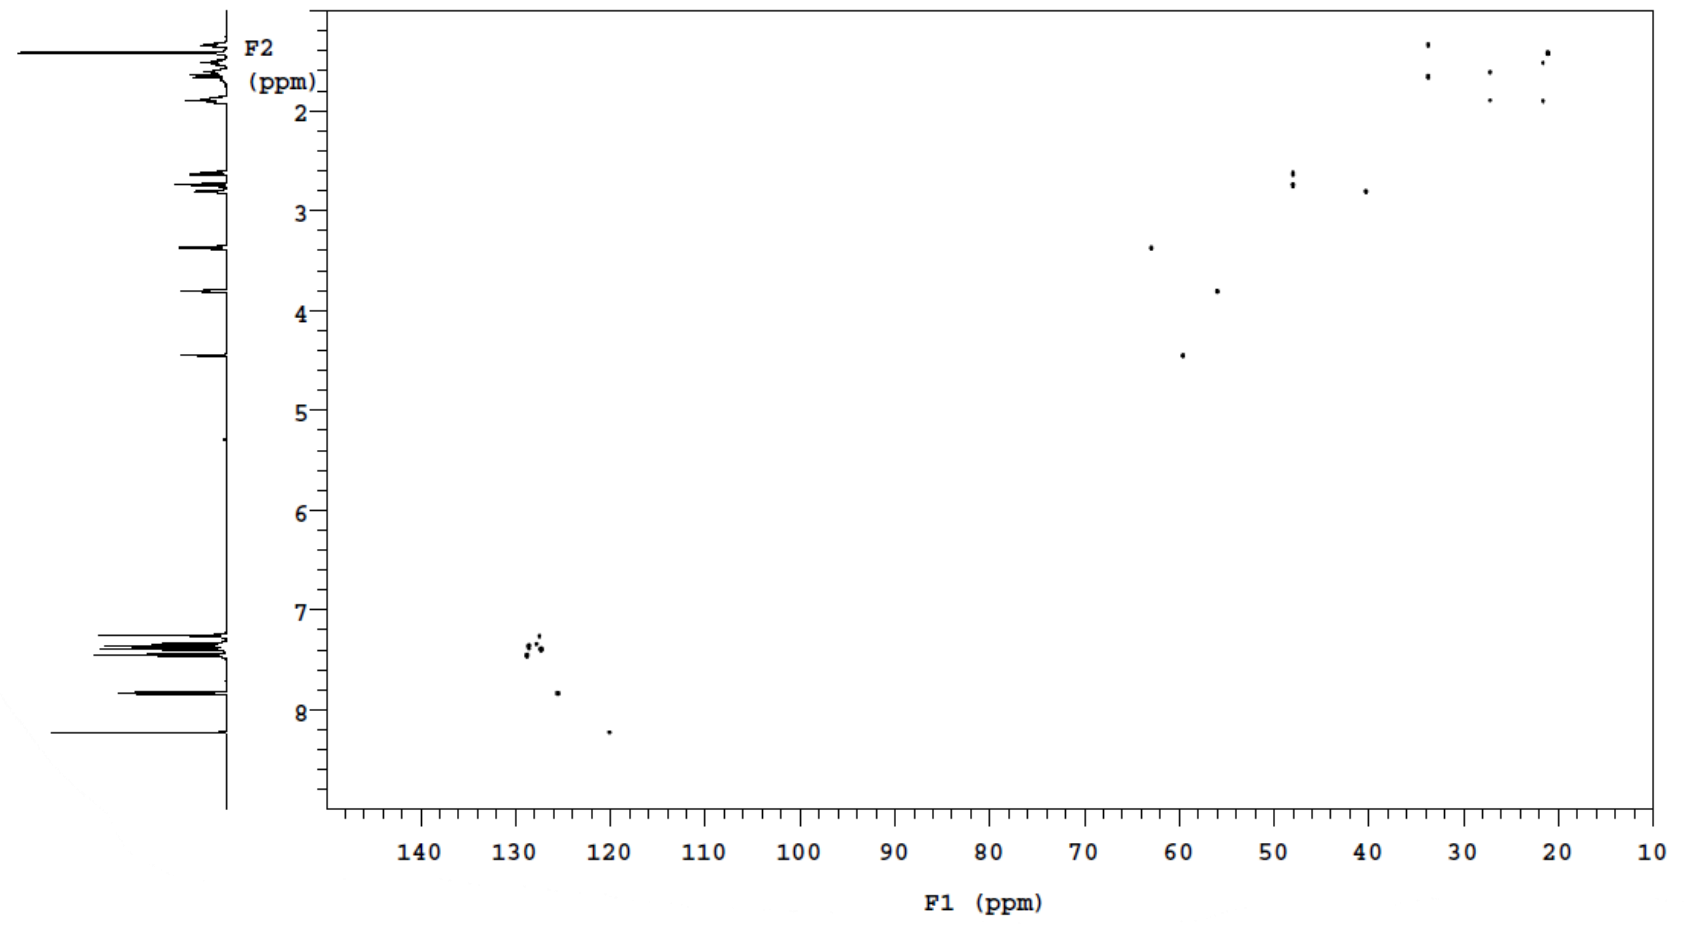

Figure S1c.  $^1\text{H}$ - $^{13}\text{C}$  HSQC NMR spectrum of the ligand (**L**) in  $\text{CDCl}_3$

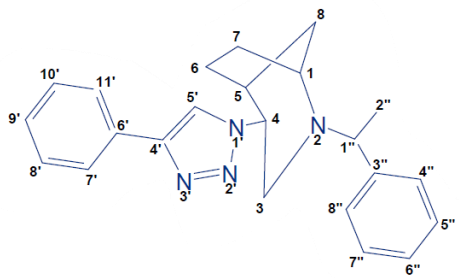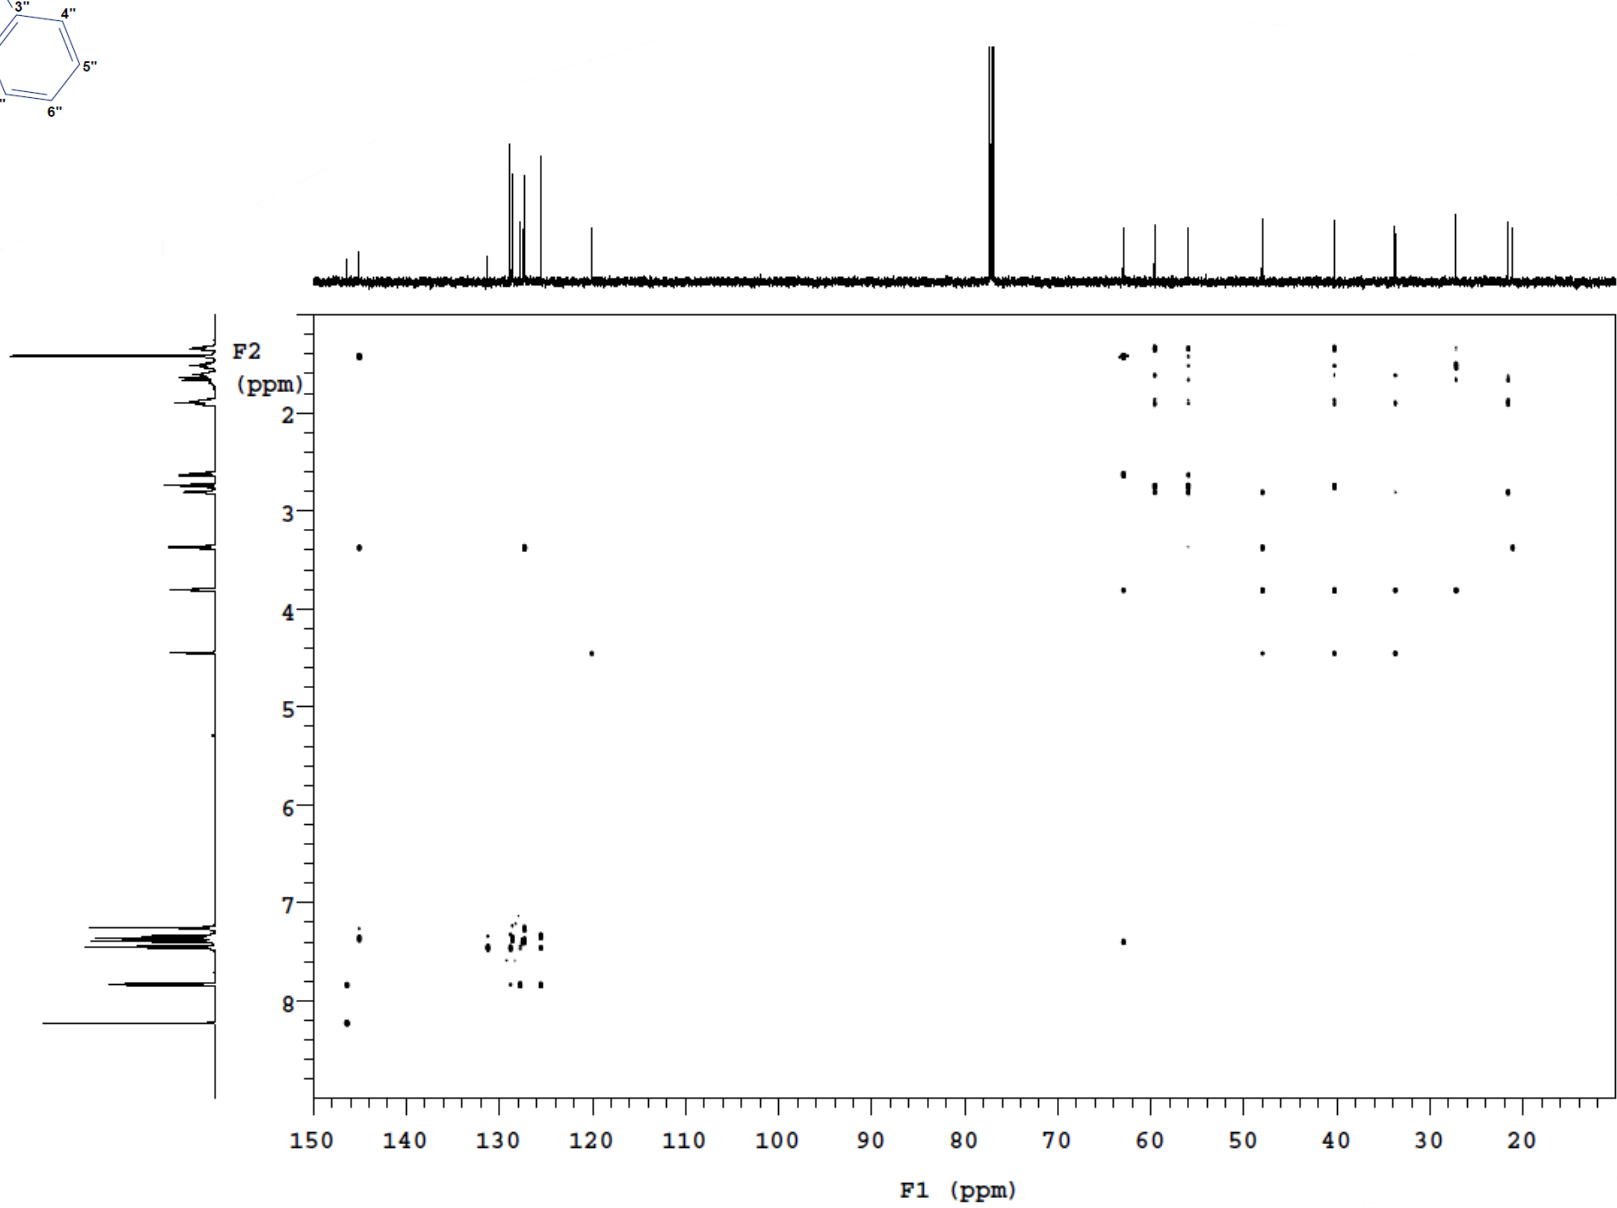

Figure S1d.  $^1\text{H}$ - $^{13}\text{C}$  HMBC NMR spectrum of the ligand (**L**) in  $\text{CDCl}_3$

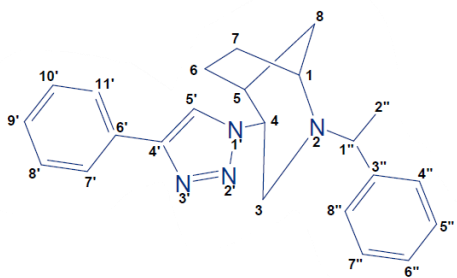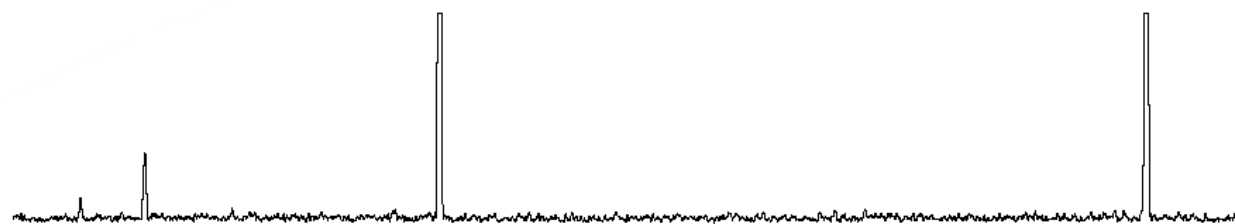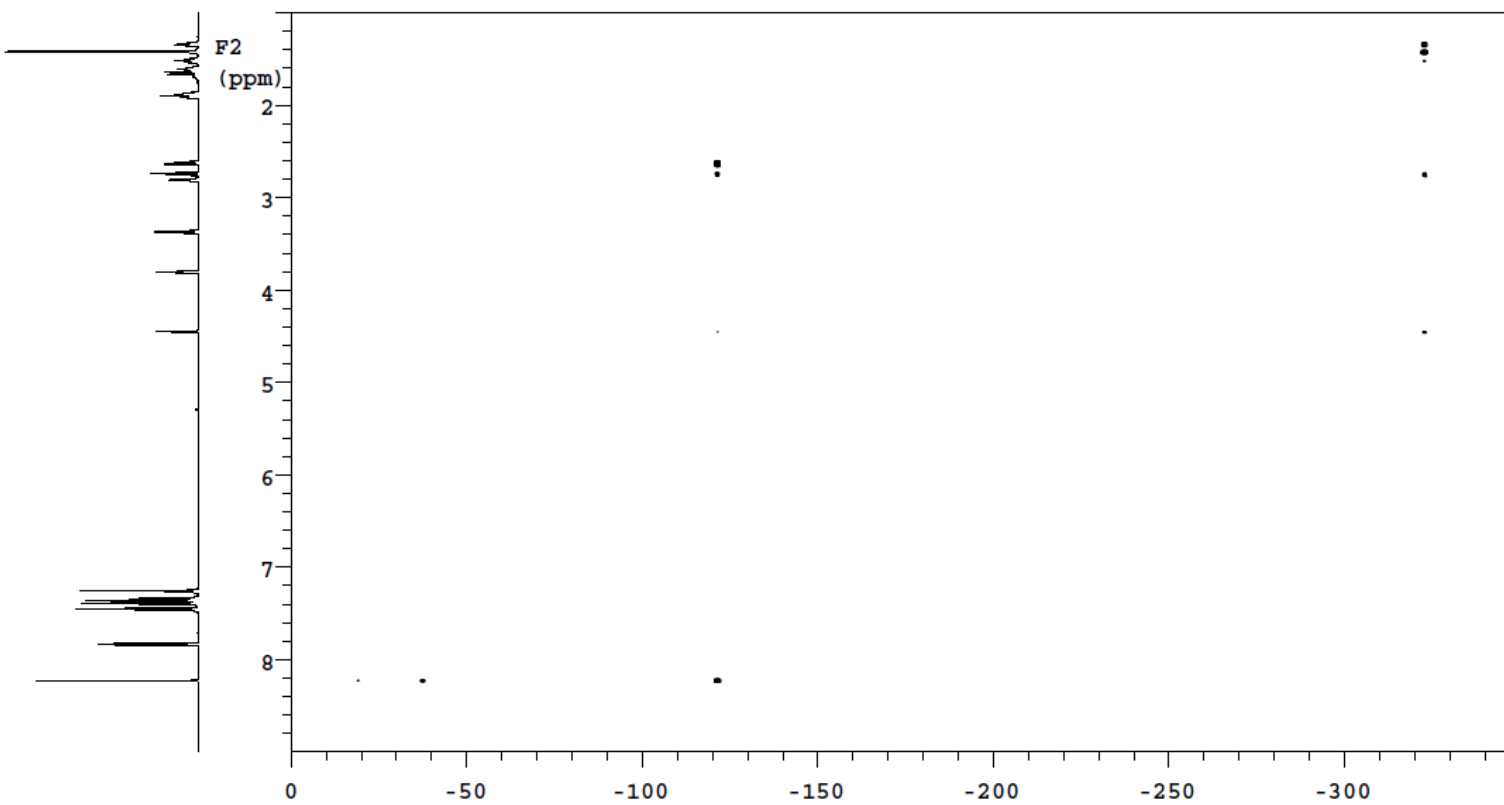

Figure S1e.  $^1\text{H}$ - $^{15}\text{N}$  HMBC NMR spectrum of the ligand (**L**) in  $\text{CDCl}_3$
