# Supplementary material for: Unveiling the promising in vitro anticancer activity of lipophilic platinum(ii) complexes containing (1S,4R,5R)-4-(4-phenyl-1H-1,2,3-triazol-1-yl)-2-((S)-1-phenylethyl)-2-azabicyclo[3.2.1]octane: a spectroscopic characterization and DFT calculation
Source: Royal Society of Chemistry journal article supplement (doi:10.1039/d4dt03021d), 2025-01-01
Supplement: d4dt03021d7.pdf [file d4dt03021d7.pdf]

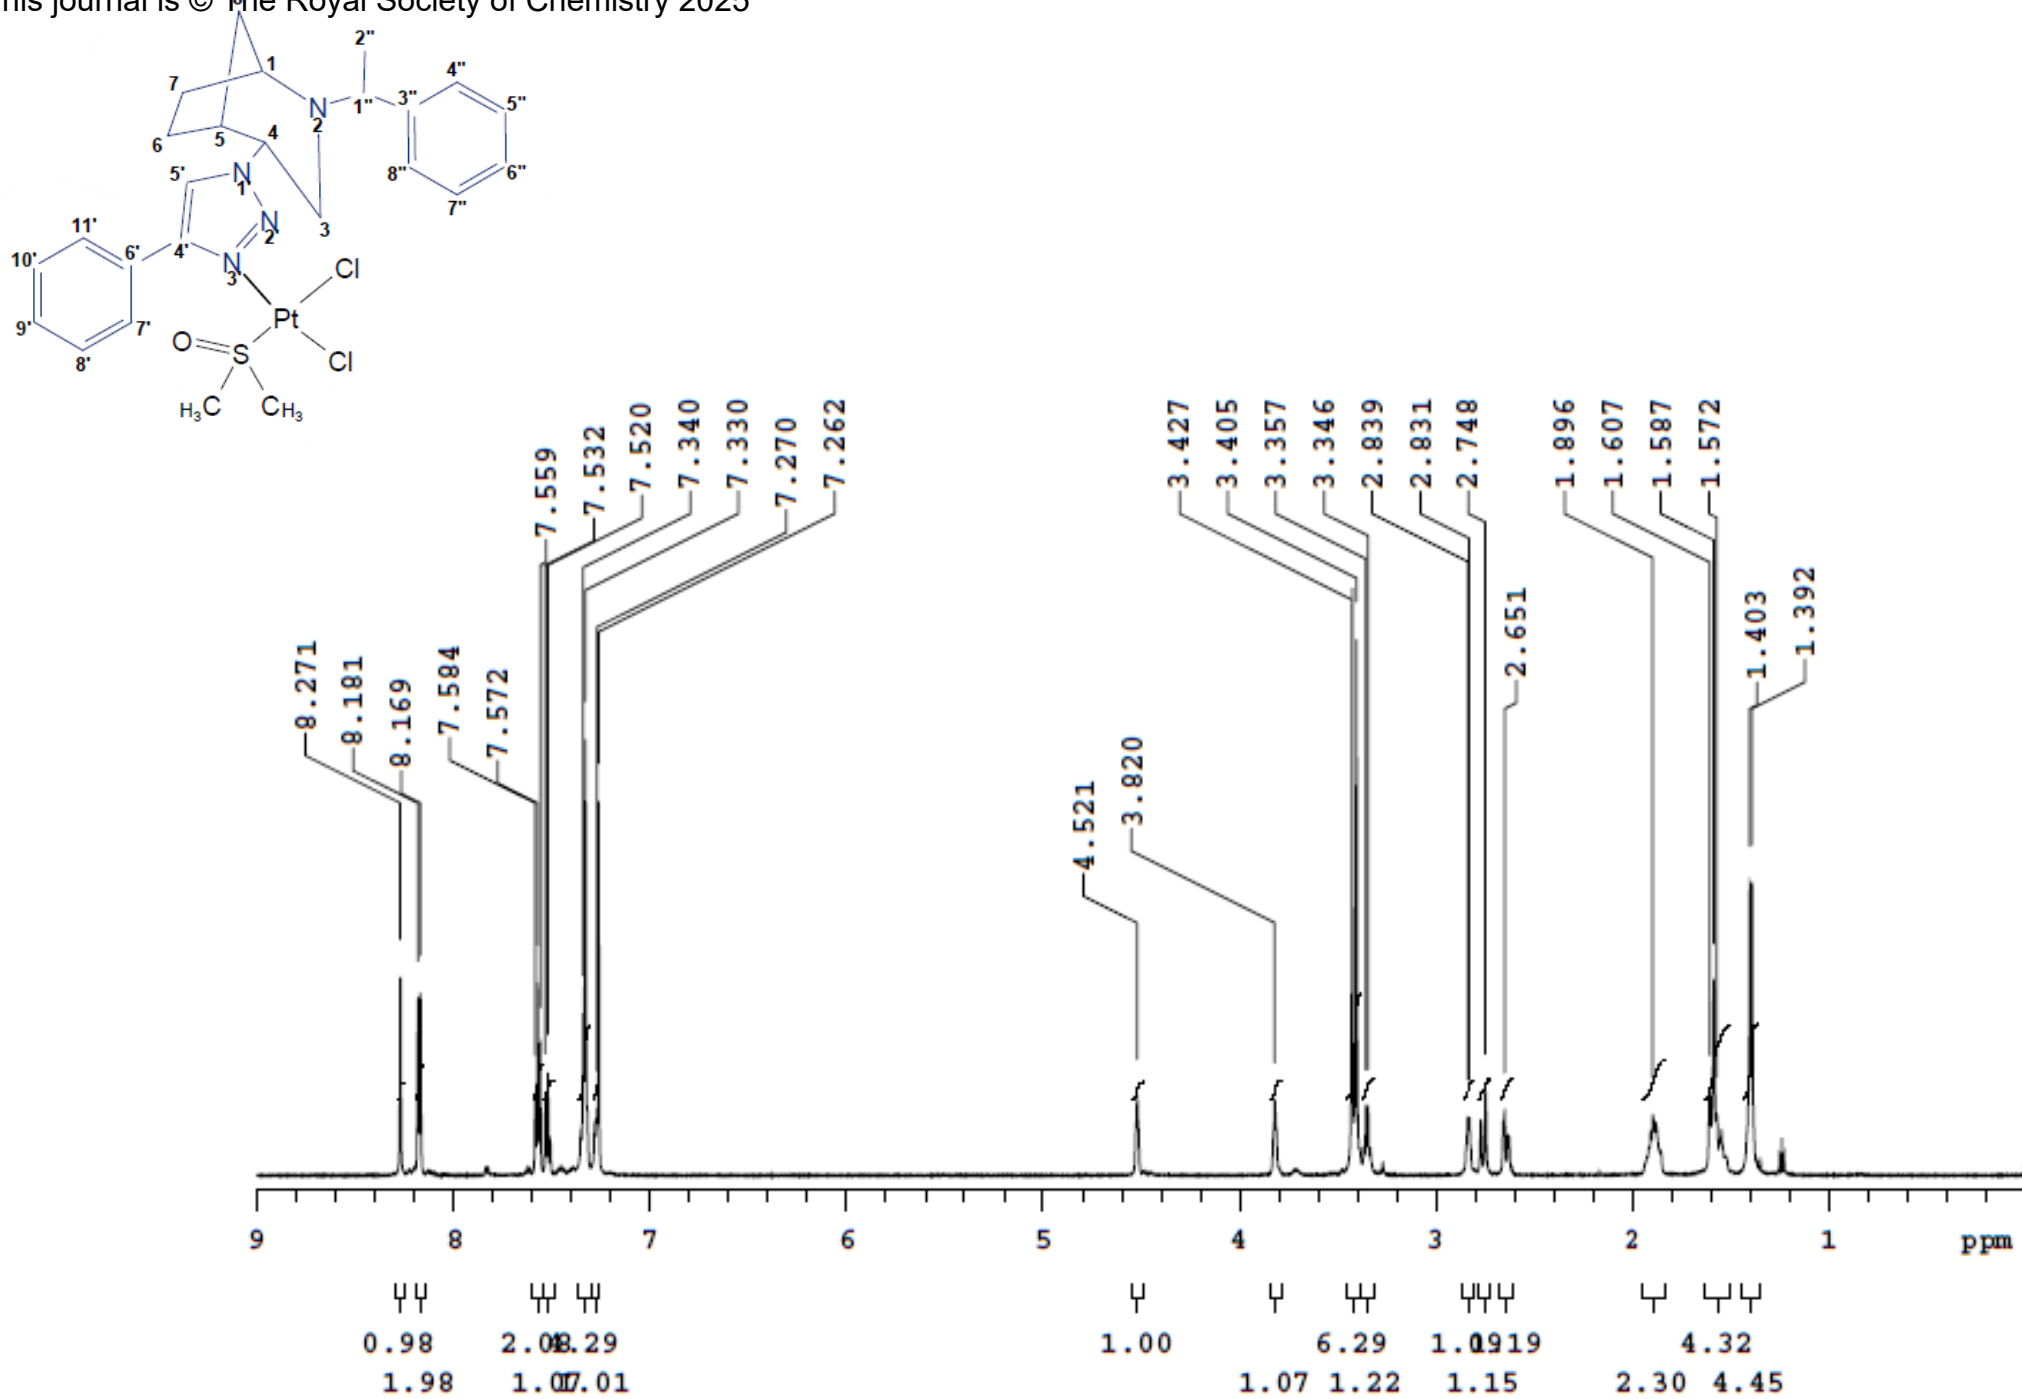

Figure S4a. <sup>1</sup>H NMR spectrum of the complex *cis*-[PtCl<sub>2</sub>(DMSO)L] (2)

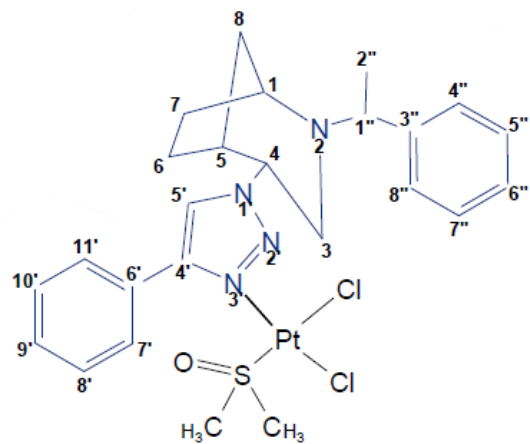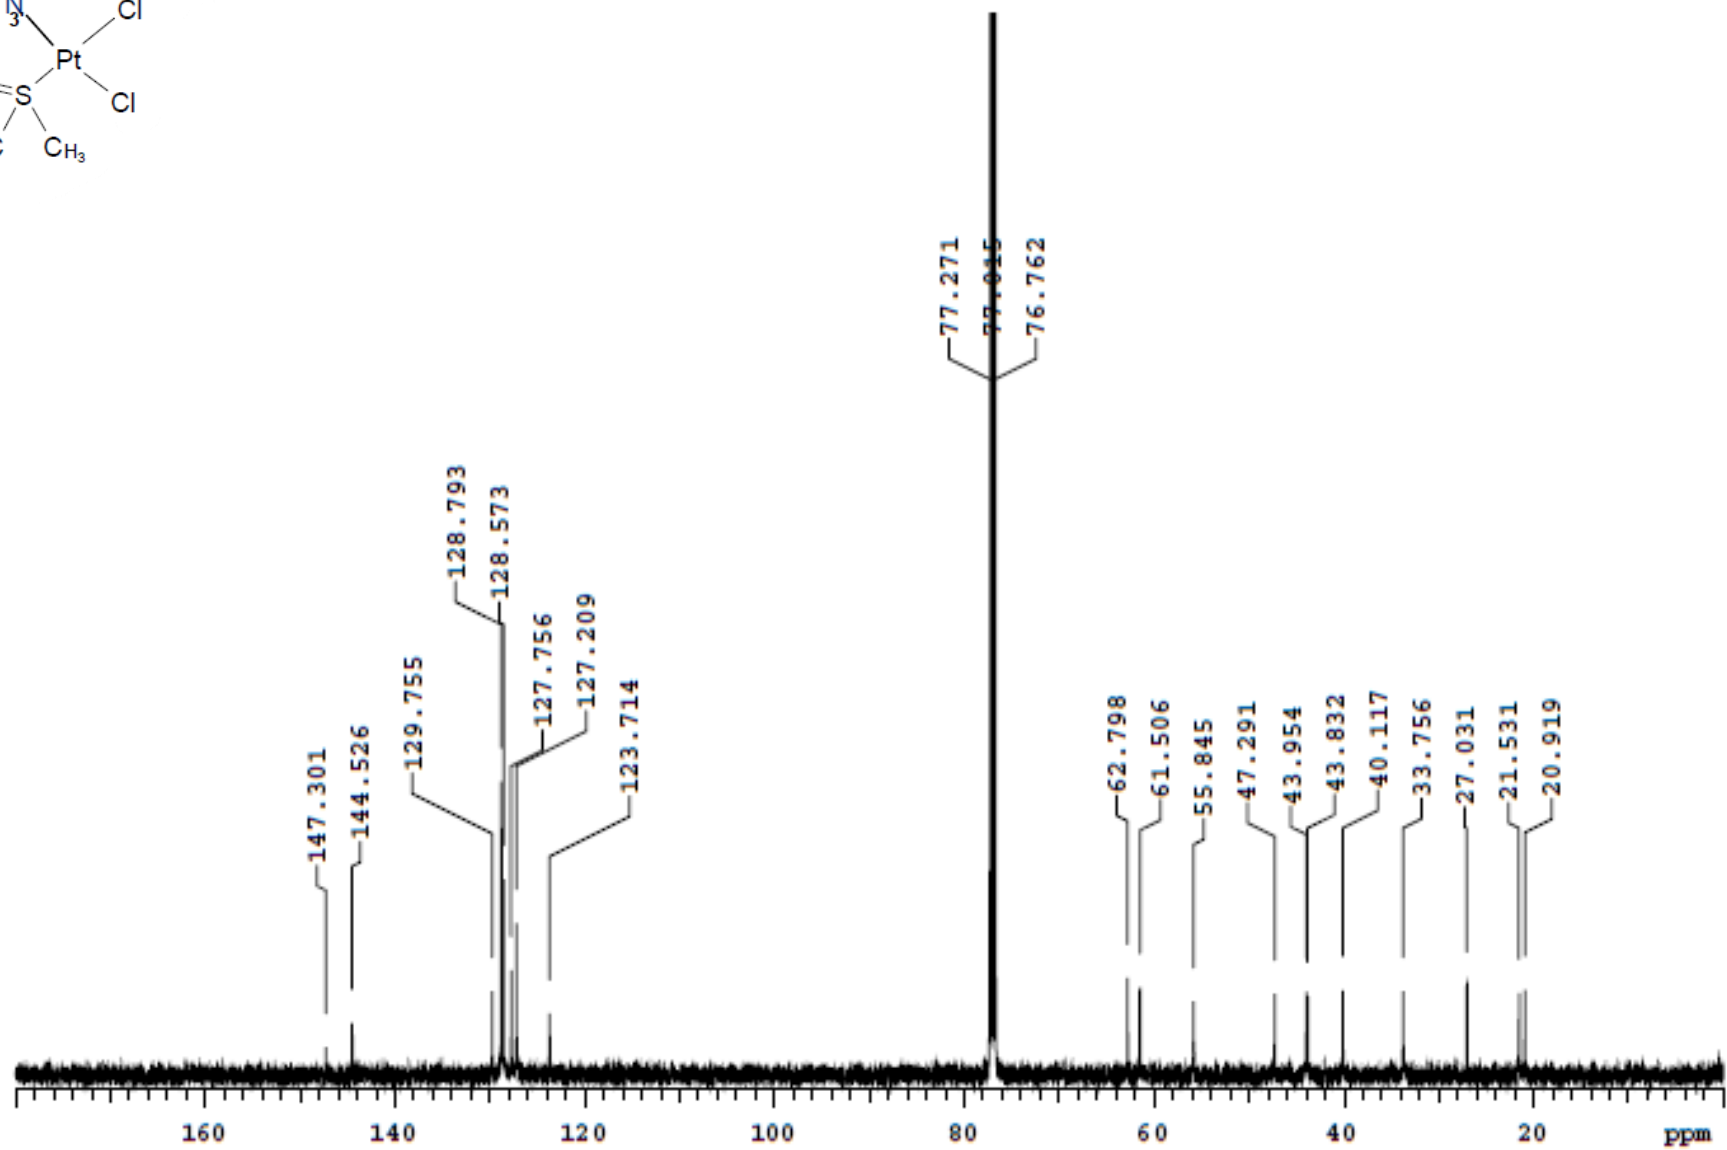

Figure S4b.  $^{13}\text{C}$  NMR spectrum of the complex *cis*-[PtCl<sub>2</sub>(DMSO)L] (**2**)

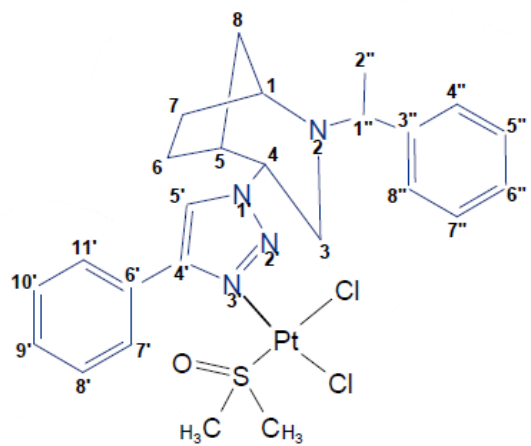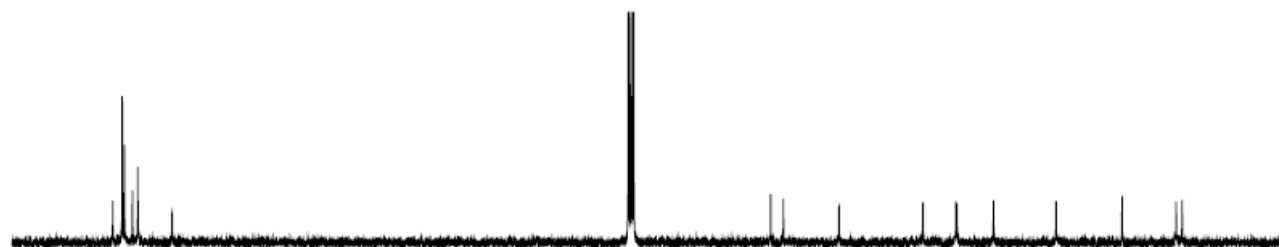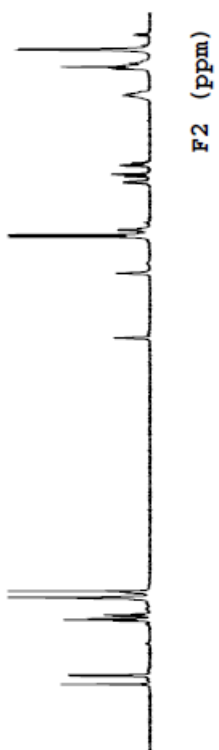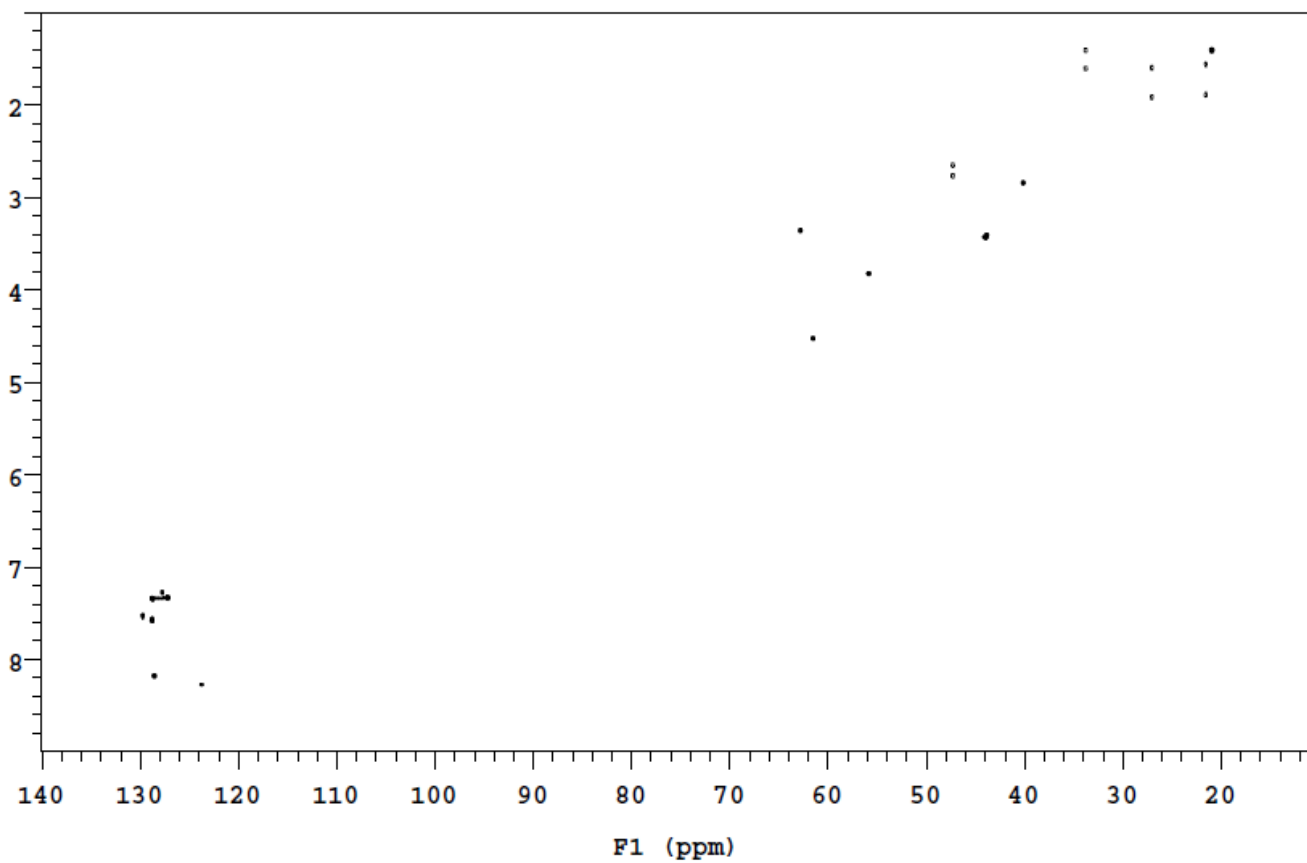

Figure S4c.  $^1\text{H}$ - $^{13}\text{C}$  HSQC NMR spectrum of the complex *cis*-[PtCl<sub>2</sub>(DMSO)L] (**2**)

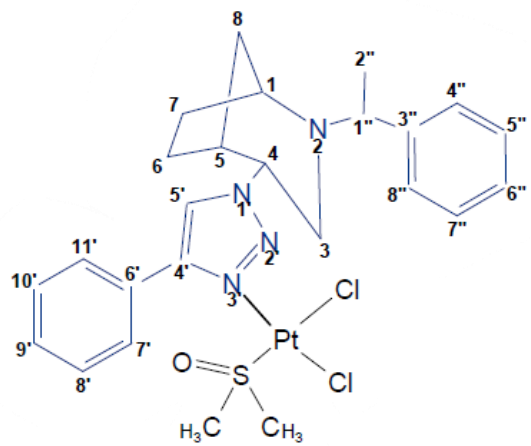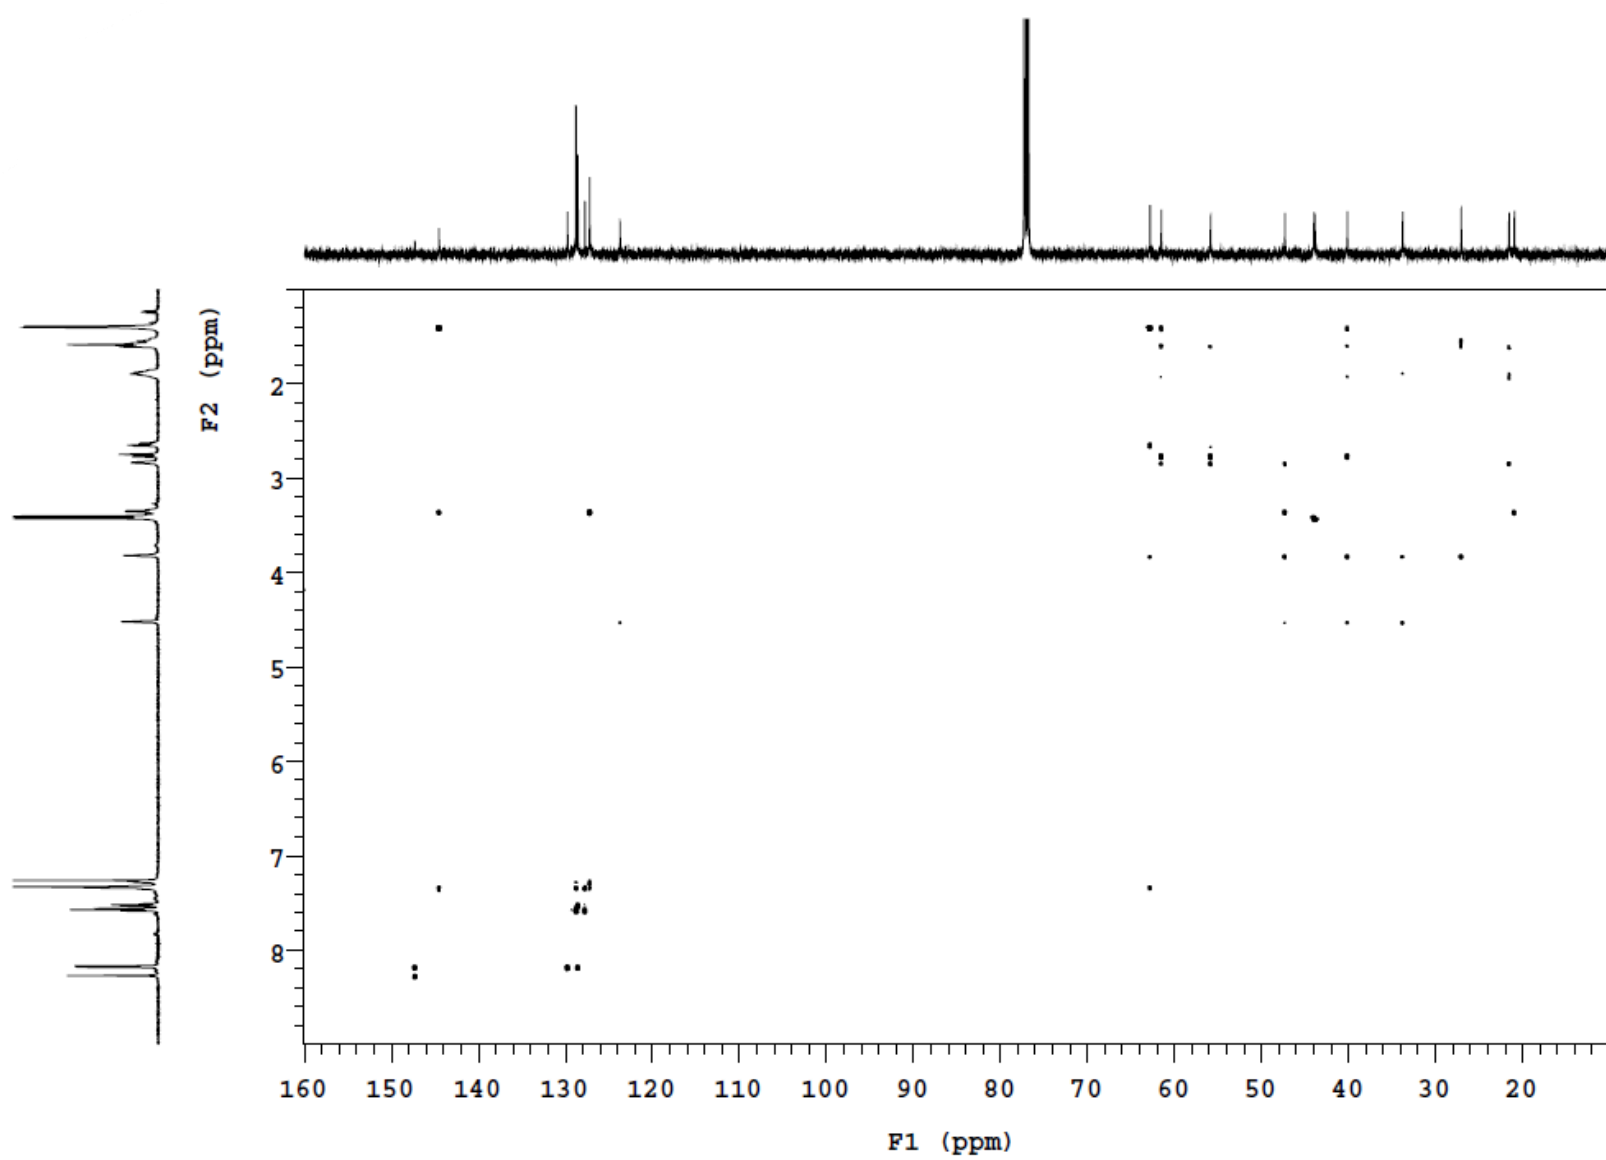

Figure S4d.  $^1\text{H}$ - $^{13}\text{C}$  HMBC NMR spectrum of the complex *cis*-[PtCl<sub>2</sub>(DMSO)L] (**2**)

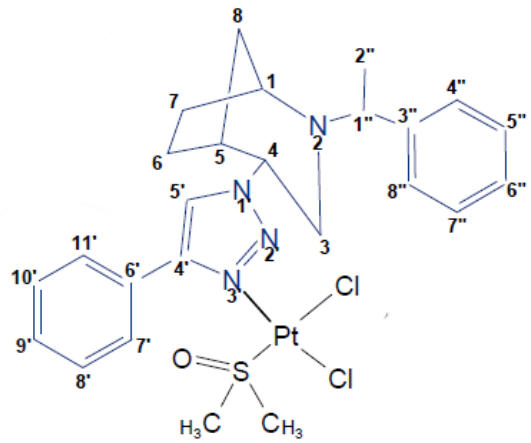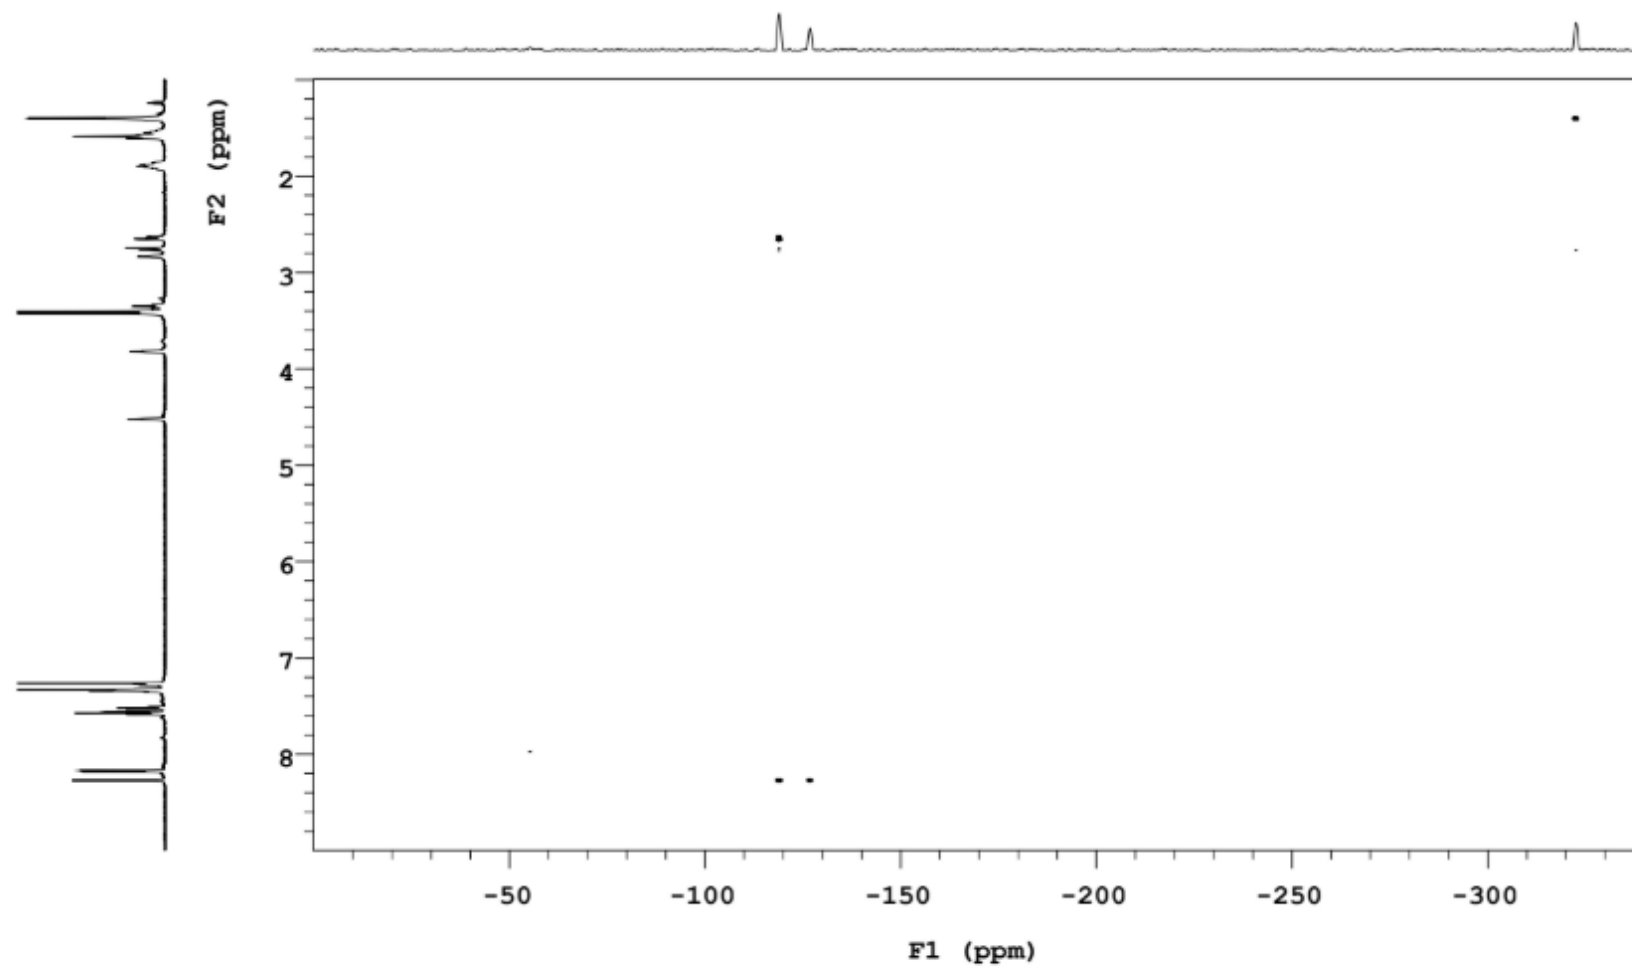

Figure S4e.  $^1\text{H}$ - $^{15}\text{N}$  HMBC NMR spectrum of the complex *cis*-[PtCl<sub>2</sub>(DMSO)L] (**2**)

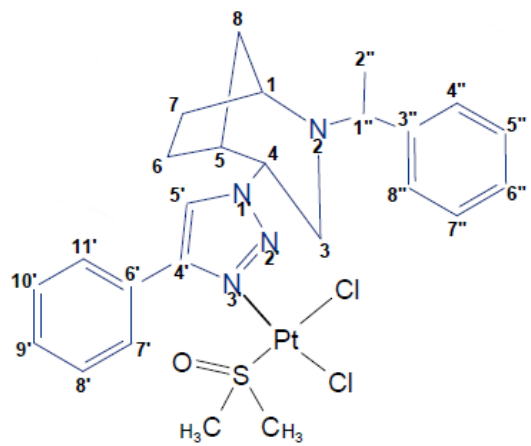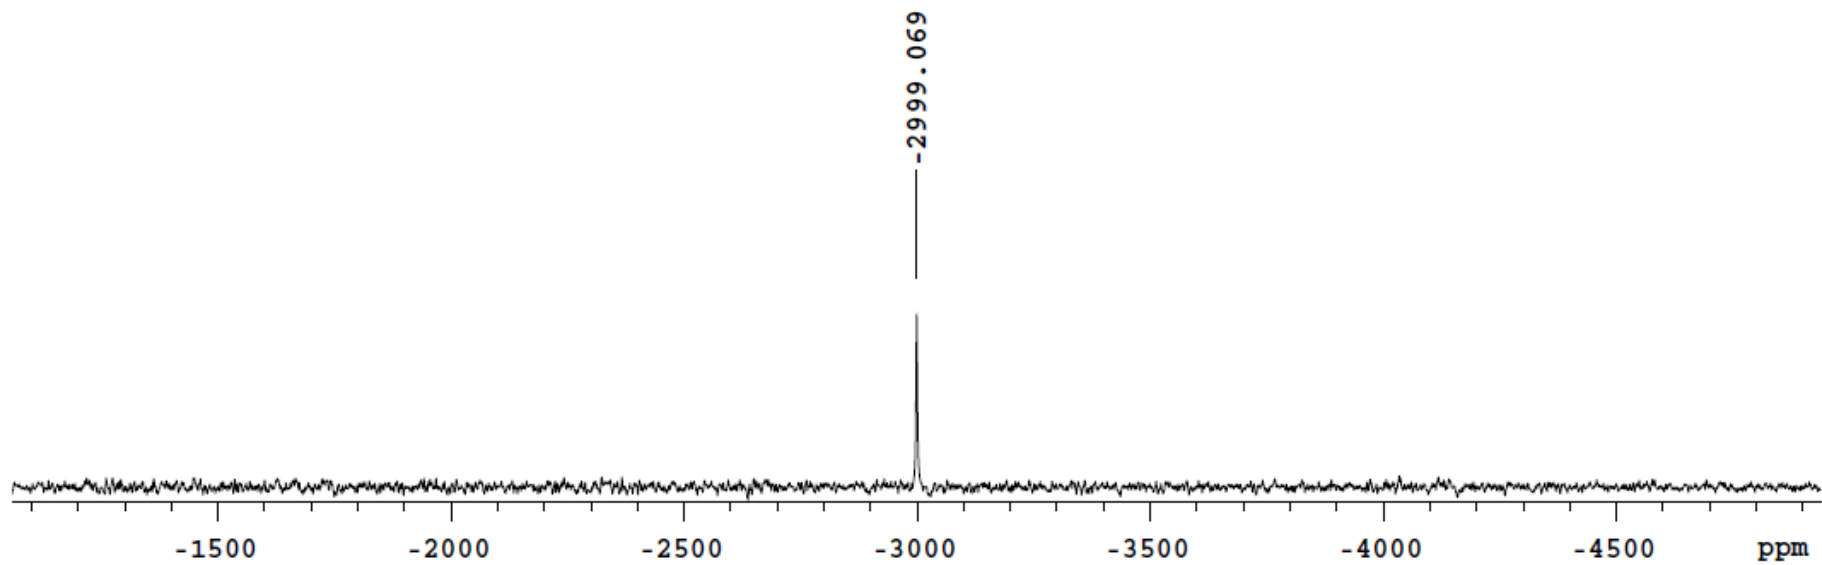

Figure S4f.  $^{195}\text{Pt}$  NMR spectrum of the complex *cis*-[PtCl<sub>2</sub>(DMSO)L] (**2**)
