# Supplementary material for: Unveiling the promising in vitro anticancer activity of lipophilic platinum(ii) complexes containing (1S,4R,5R)-4-(4-phenyl-1H-1,2,3-triazol-1-yl)-2-((S)-1-phenylethyl)-2-azabicyclo[3.2.1]octane: a spectroscopic characterization and DFT calculation
Source: Royal Society of Chemistry journal article supplement (doi:10.1039/d4dt03021d), 2025-01-01
Supplement: d4dt03021d8.pdf [file d4dt03021d8.pdf]

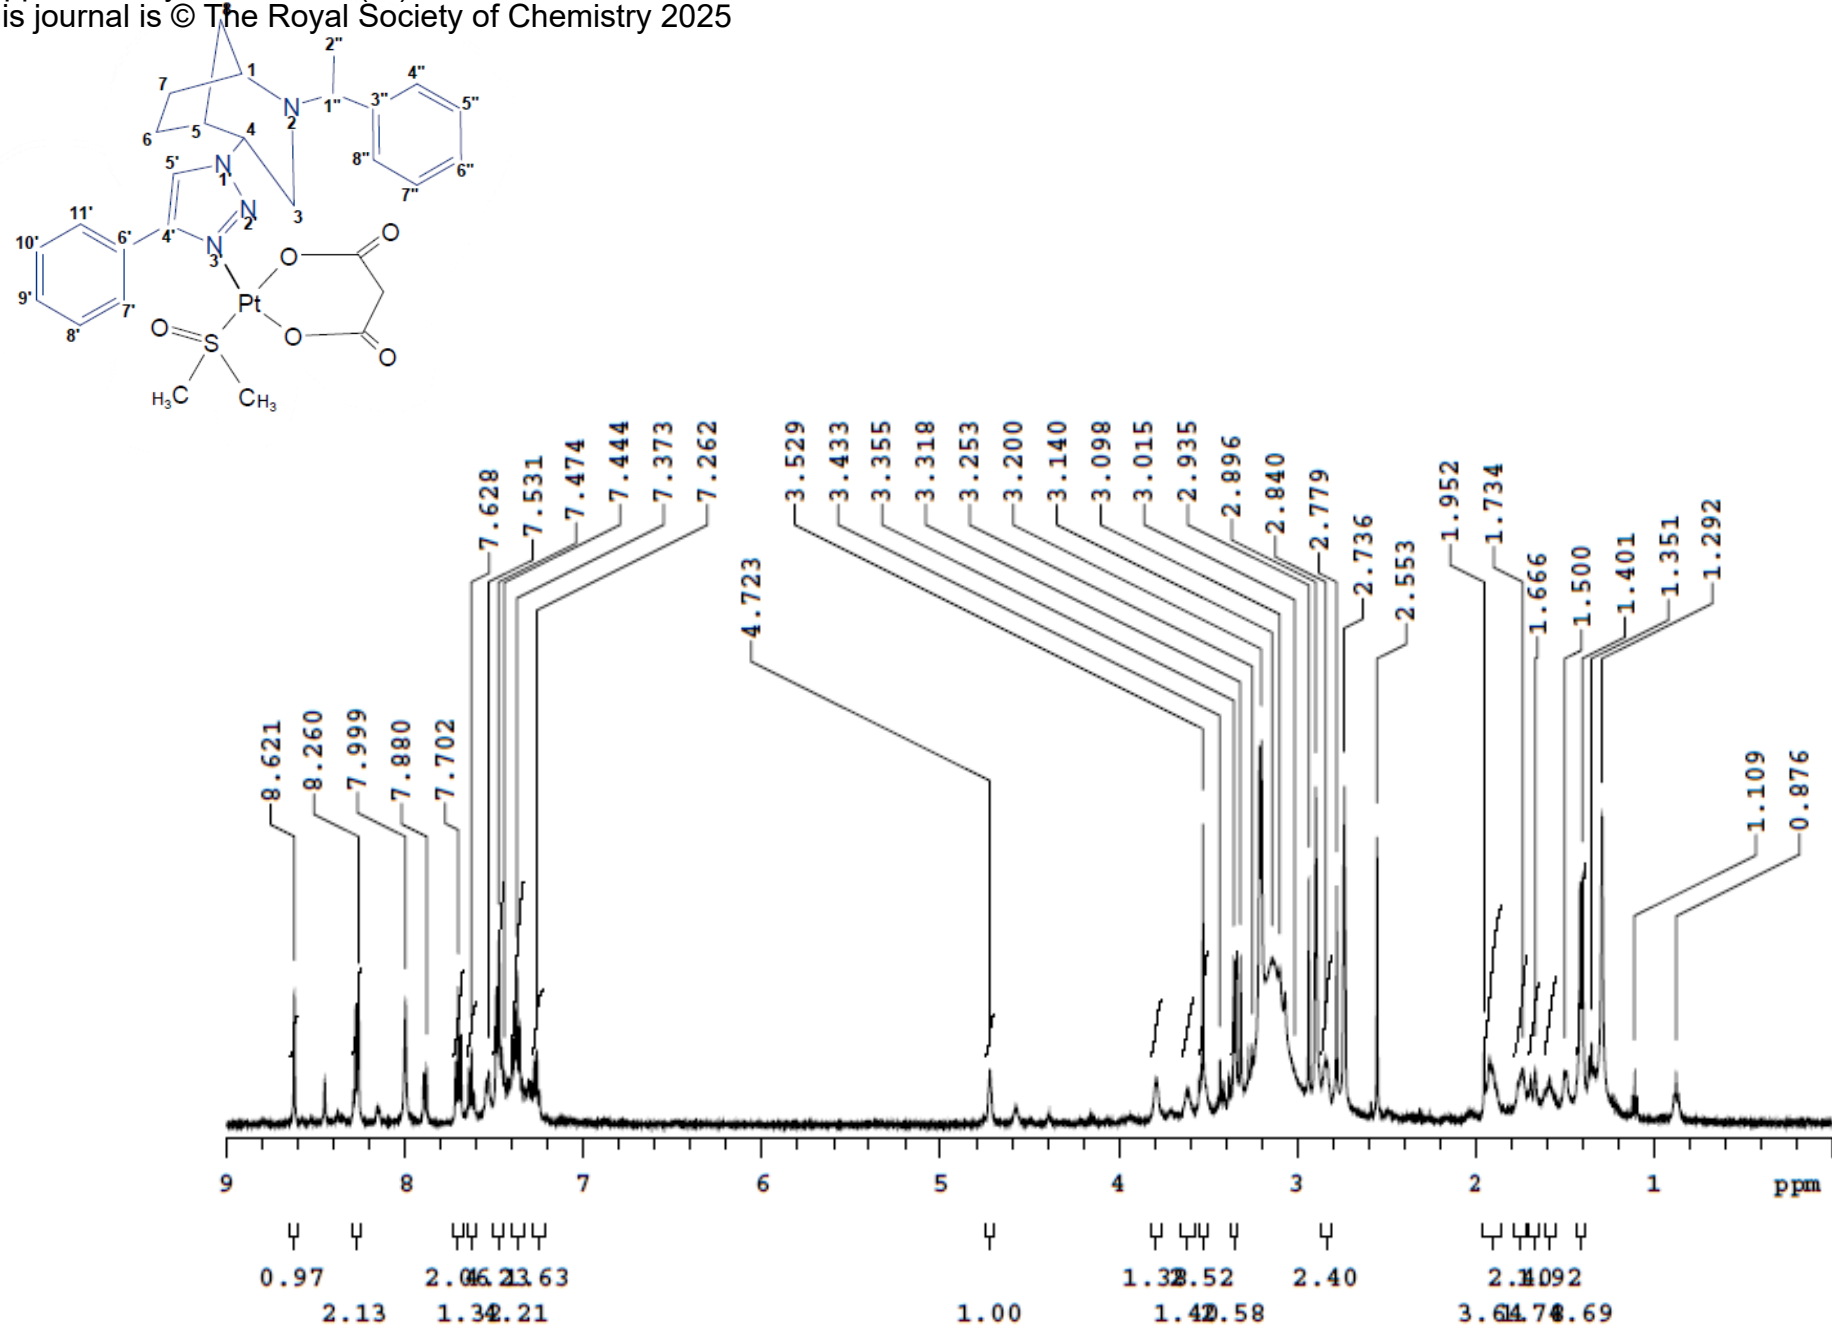

Figure S5a. <sup>1</sup>H NMR spectrum of the complex [Pt(DMSO)L(mal)] (3)

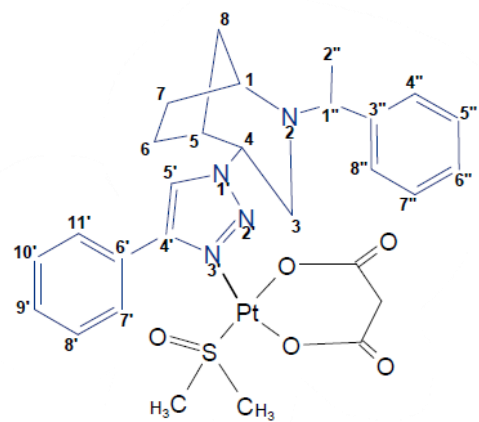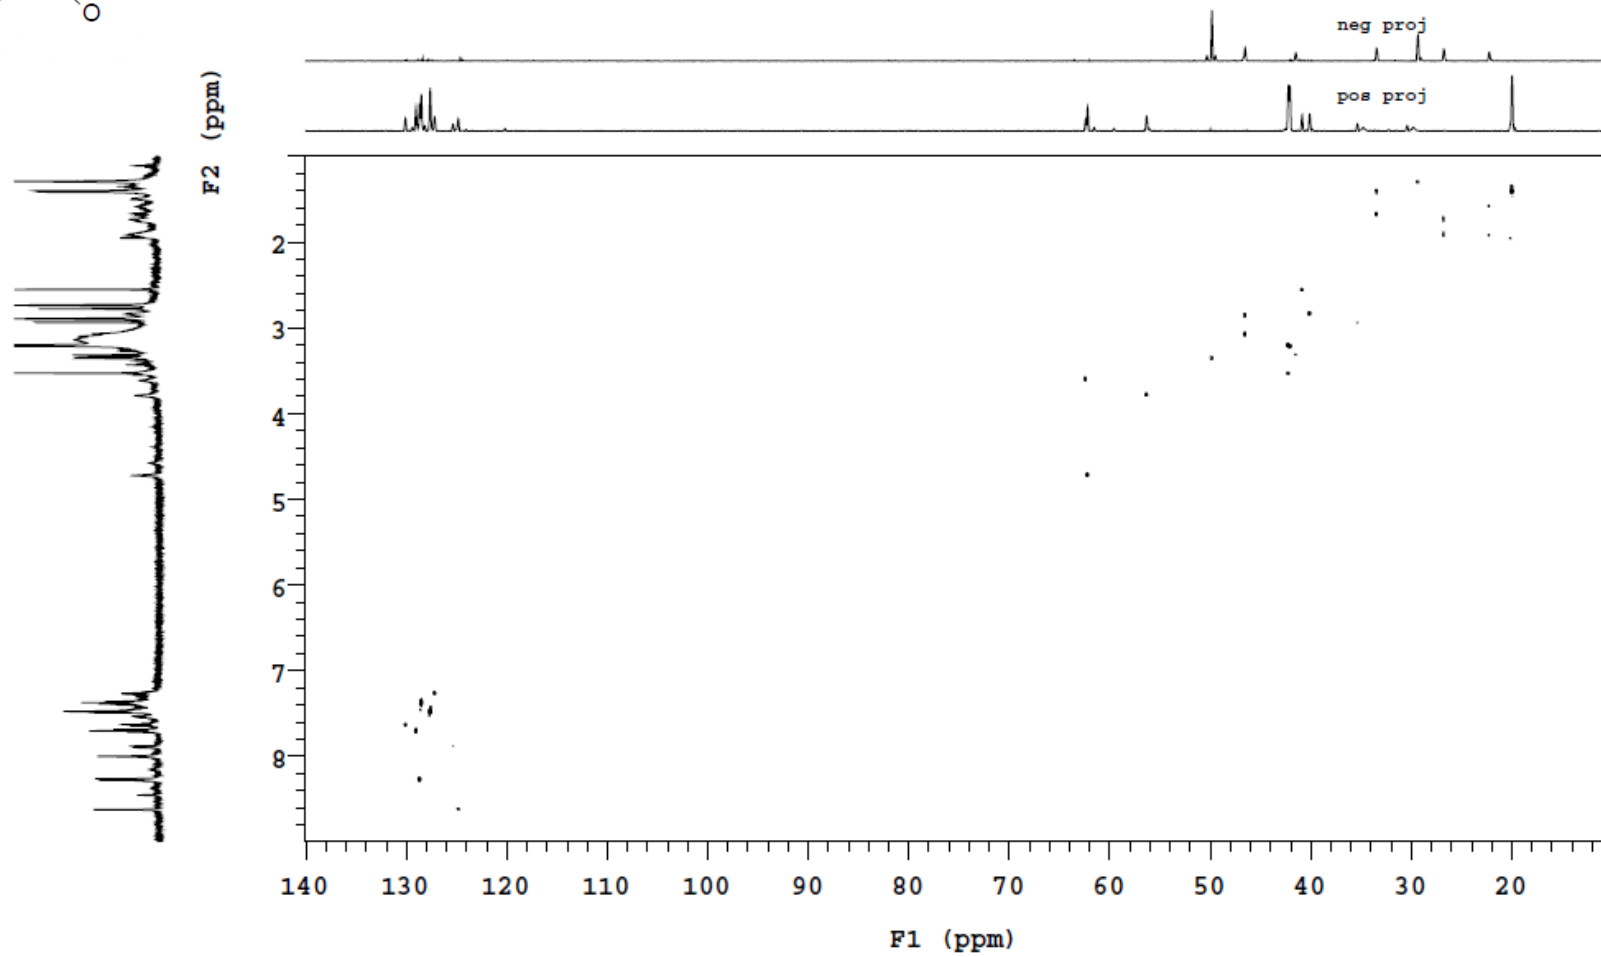

Figure S5b.  $^1\text{H}$ - $^{13}\text{C}$  HSQC NMR spectrum of the complex  $[\text{Pt}(\text{DMSO})\text{L}(\text{mal})]$  (**3**)

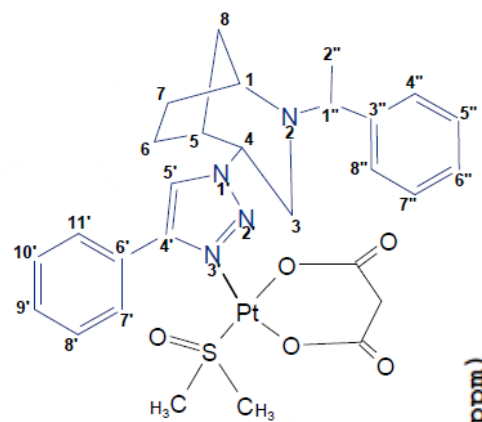

F2 (ppm)

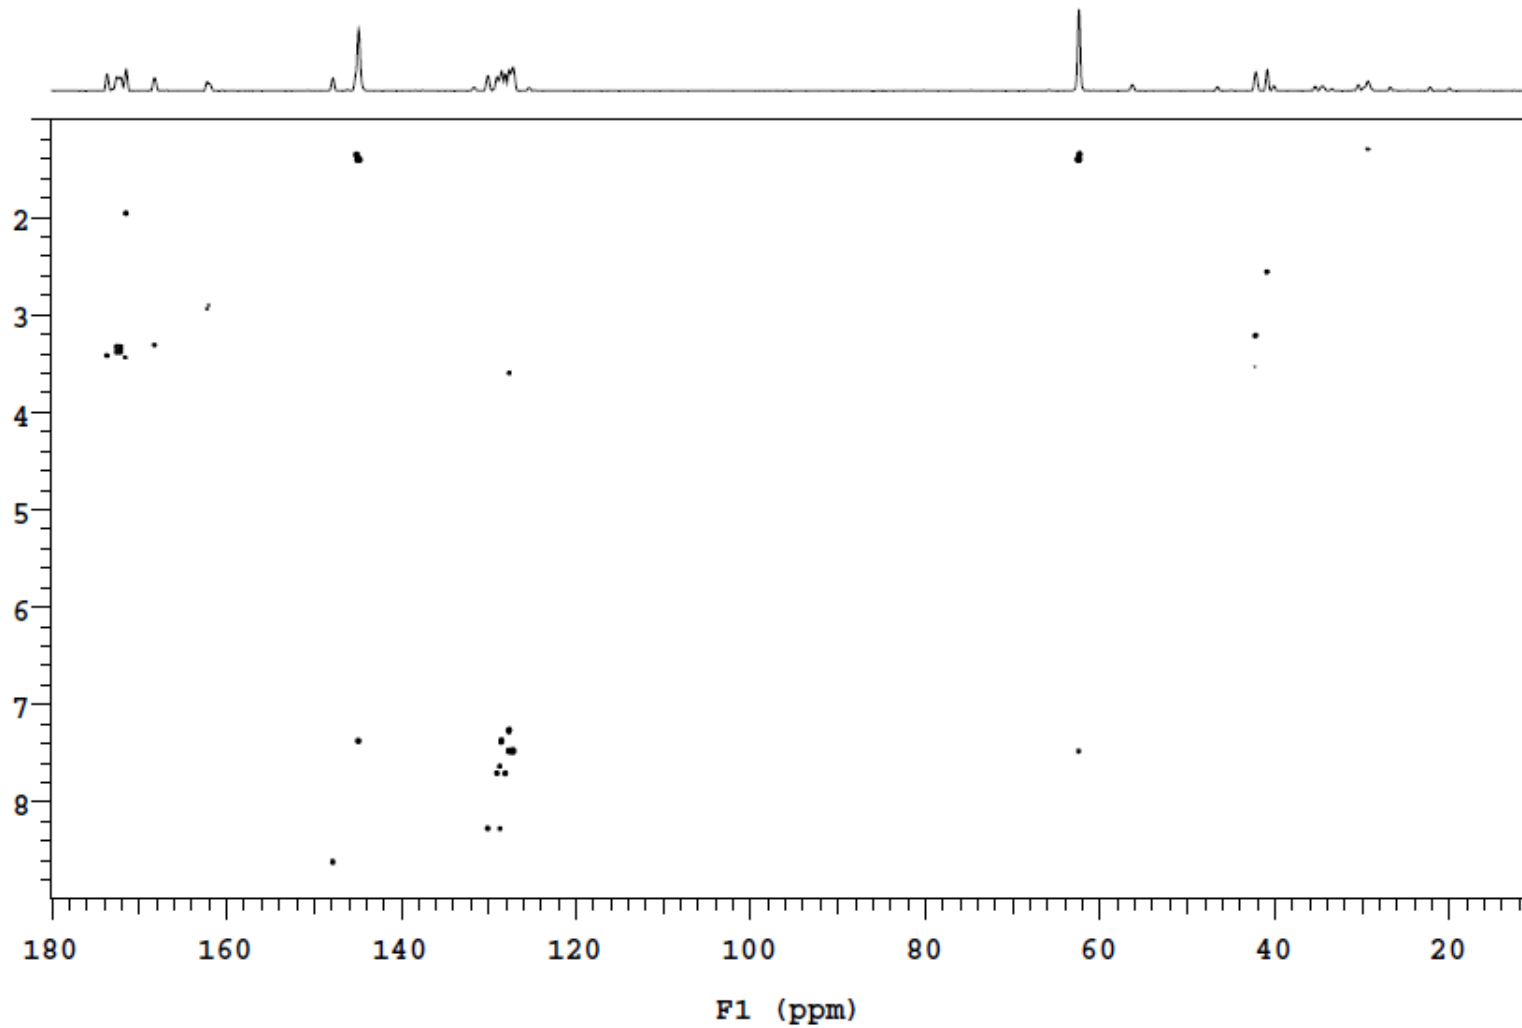

Figure S5c.  $^1\text{H}$ - $^{13}\text{C}$  HMBC NMR spectrum of the complex  $[\text{Pt}(\text{DMSO})\text{L}(\text{mal})]$  (**3**)

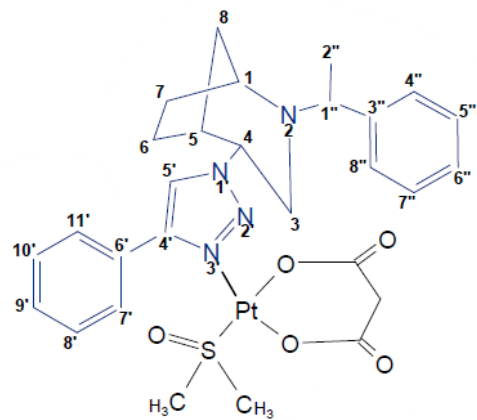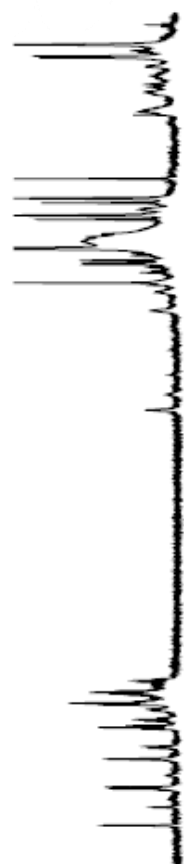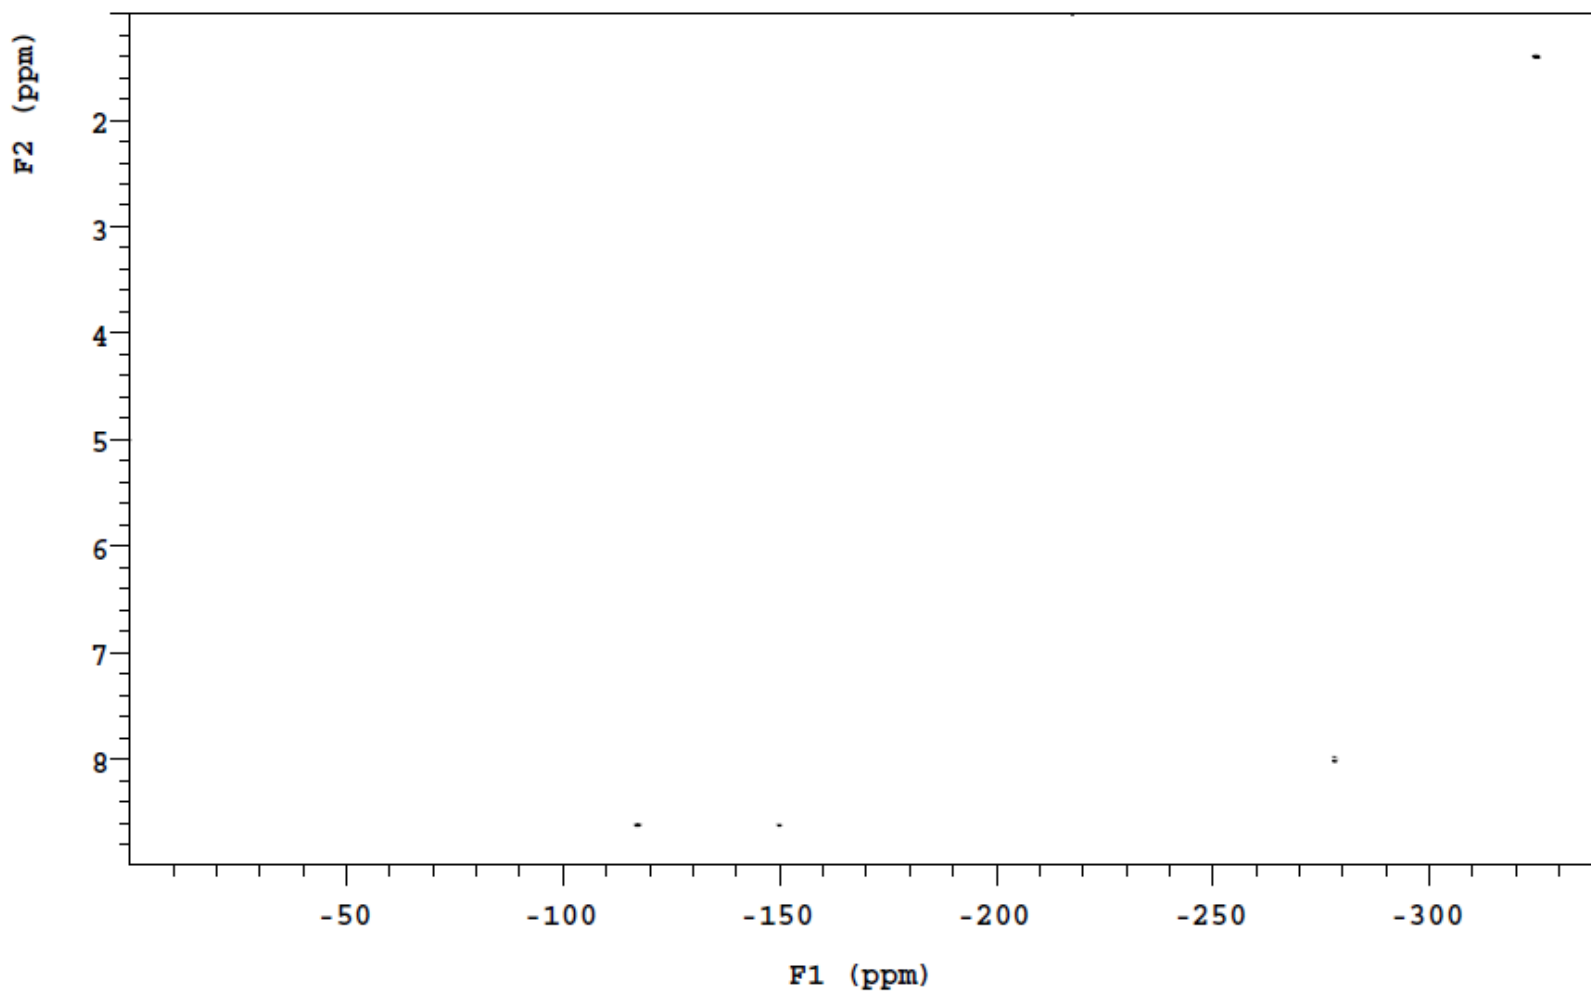

Figure S5d.  $^1\text{H}$ - $^{15}\text{N}$  HMBC NMR spectrum of the complex  $[\text{Pt}(\text{DMSO})\text{L}(\text{mal})]$  (**3**)

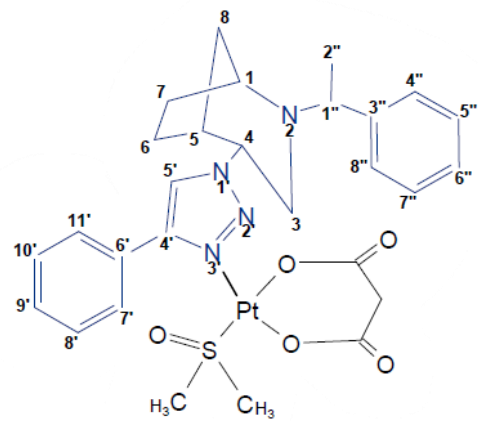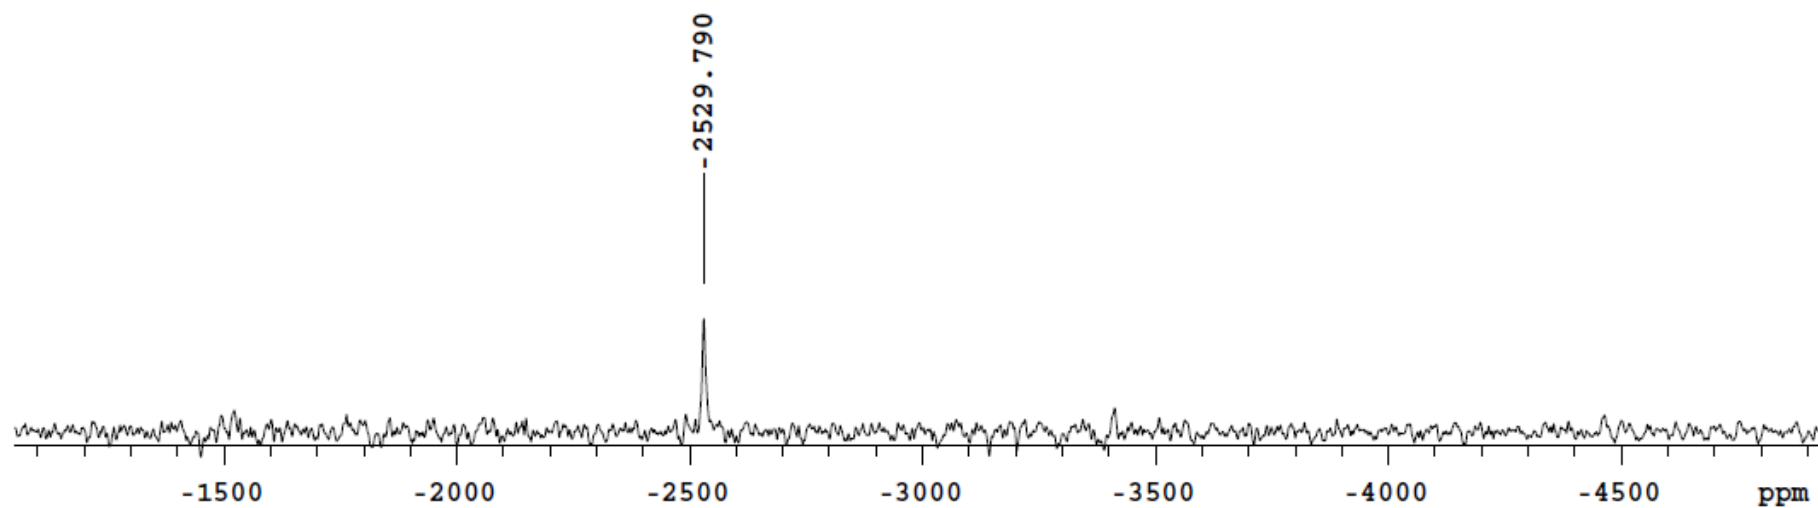

Figure S5e.  $^{195}\text{Pt}$  NMR spectrum of the complex  $[\text{Pt}(\text{DMSO})\text{L}(\text{mal})]$  (**3**)
