# Supplementary material for: Unveiling the promising in vitro anticancer activity of lipophilic platinum(ii) complexes containing (1S,4R,5R)-4-(4-phenyl-1H-1,2,3-triazol-1-yl)-2-((S)-1-phenylethyl)-2-azabicyclo[3.2.1]octane: a spectroscopic characterization and DFT calculation
Source: Royal Society of Chemistry journal article supplement (doi:10.1039/d4dt03021d), 2025-01-01
Supplement: d4dt03021d9.pdf [file d4dt03021d9.pdf]

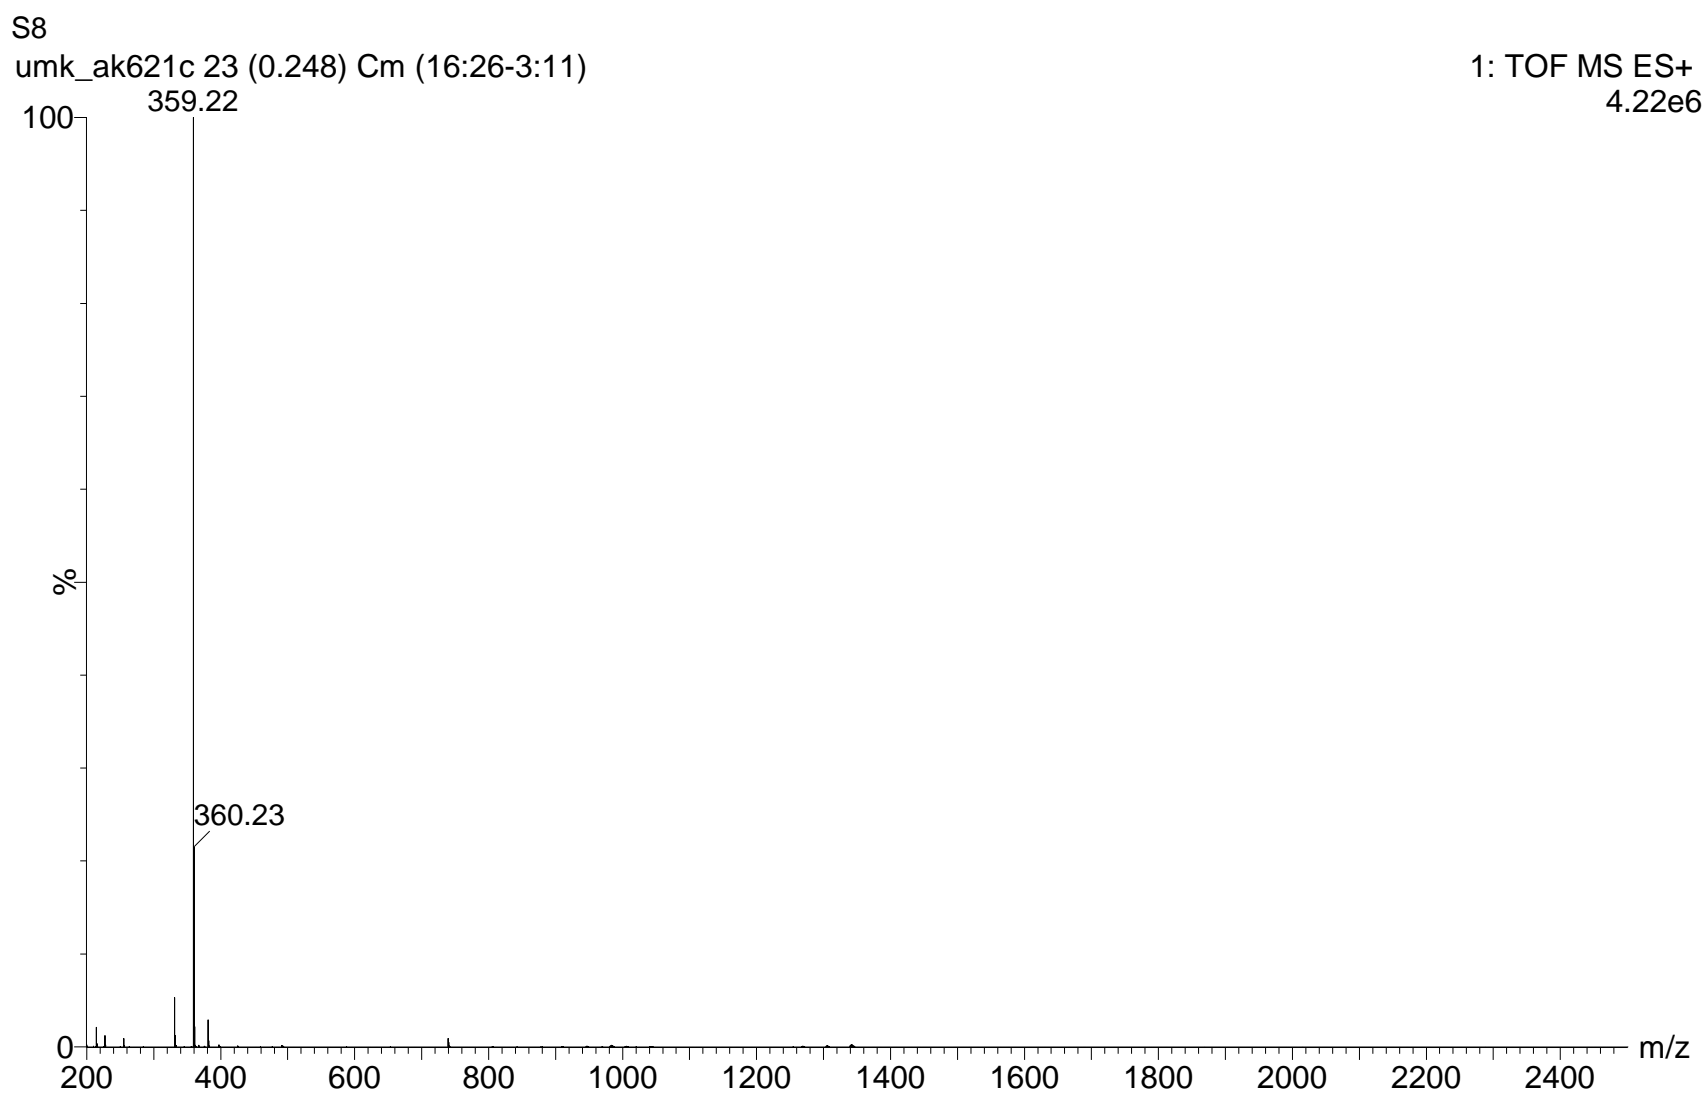

Figure S6a. MS spectrum of *trans*-[PtCl<sub>2</sub>L<sub>2</sub>] (**1**)

S8

umk\_ak621c 23 (0.248) Cm (16:26-3:11)

1: TOF MS ES+  
4.22e6

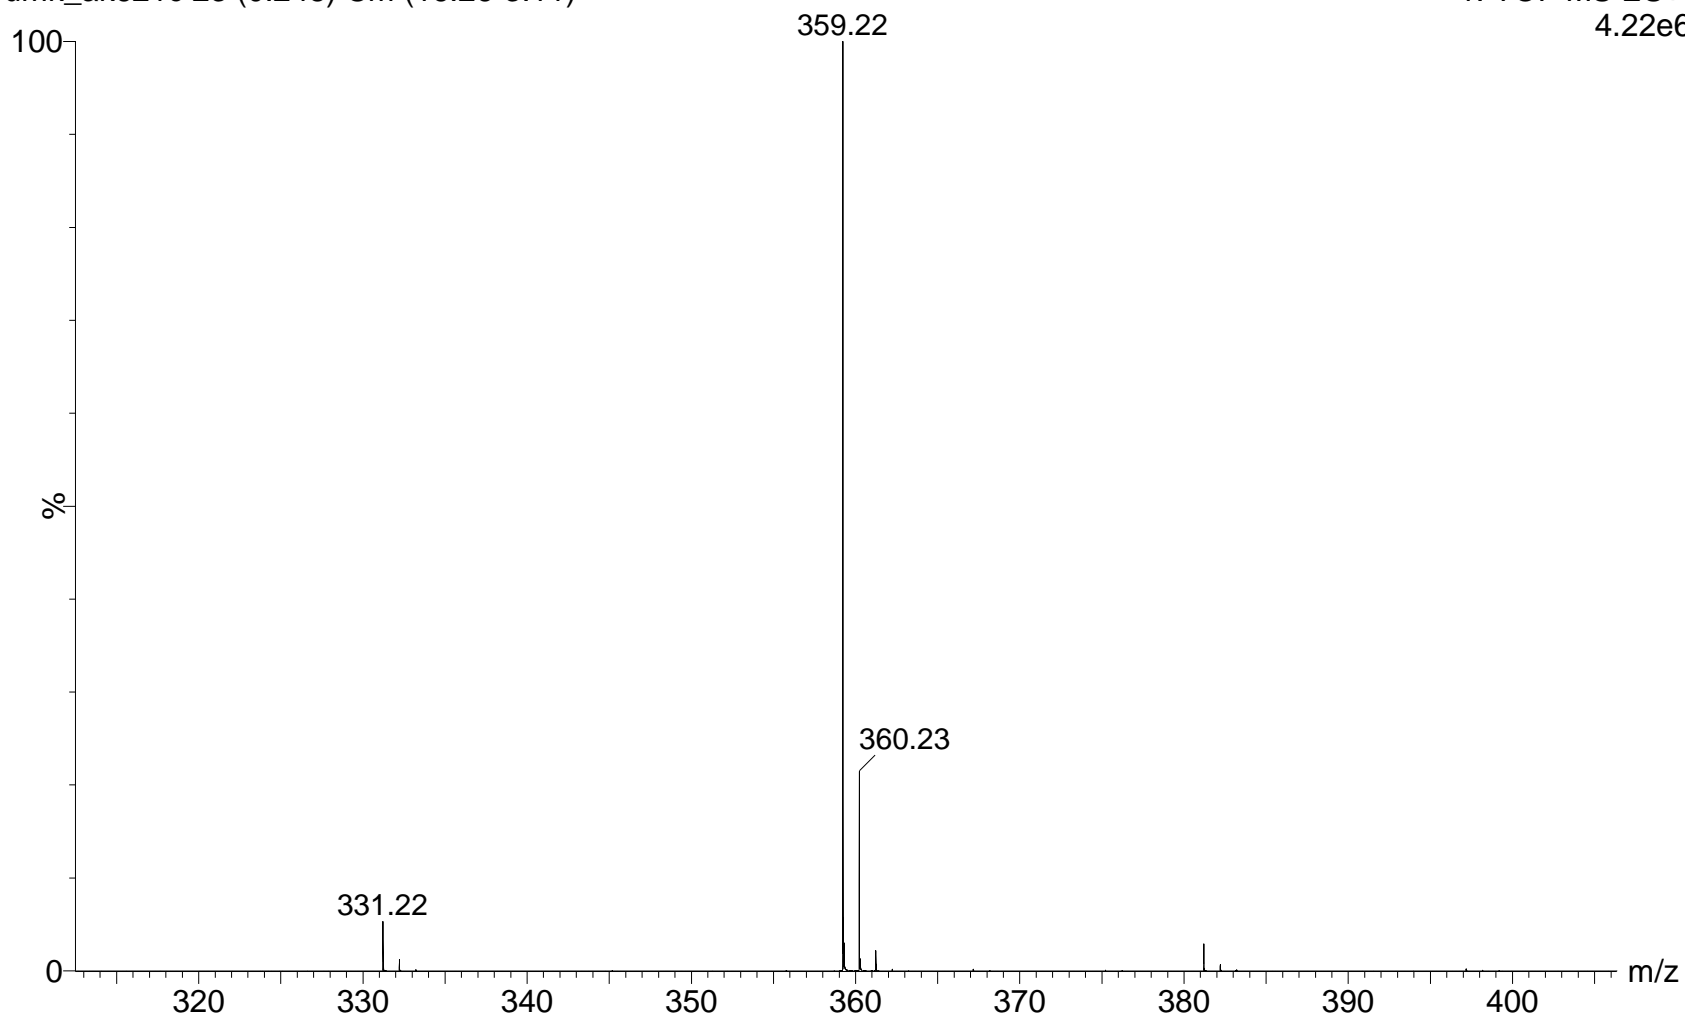

Figure S6b. MS spectrum of *trans*-[PtCl<sub>2</sub>L<sub>2</sub>] (**1**)

S8

umk\_ak621c 23 (0.248) Cm (16:26-3:11)

1: TOF MS ES+  
3.79e4

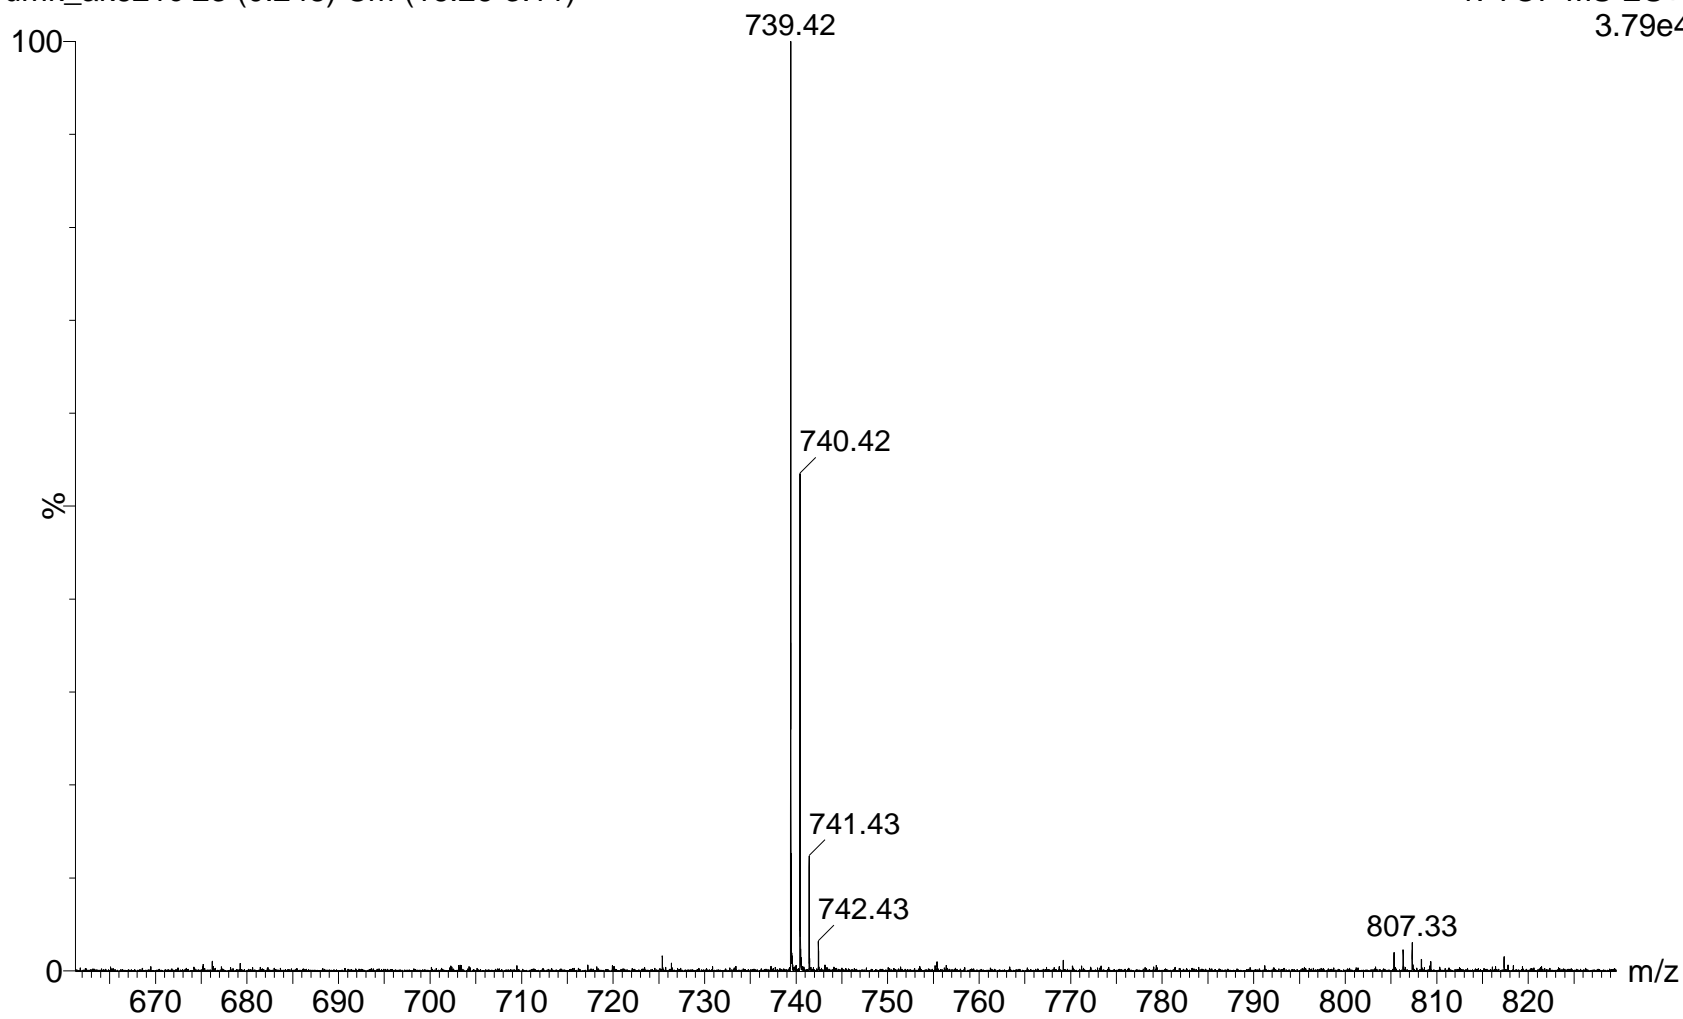

Figure S6c. MS spectrum of *trans*-[PtCl<sub>2</sub>L<sub>2</sub>] (**1**)

S8

umk\_ak621c 23 (0.248) Cm (16:26-3:11)

1: TOF MS ES+  
7.07e3

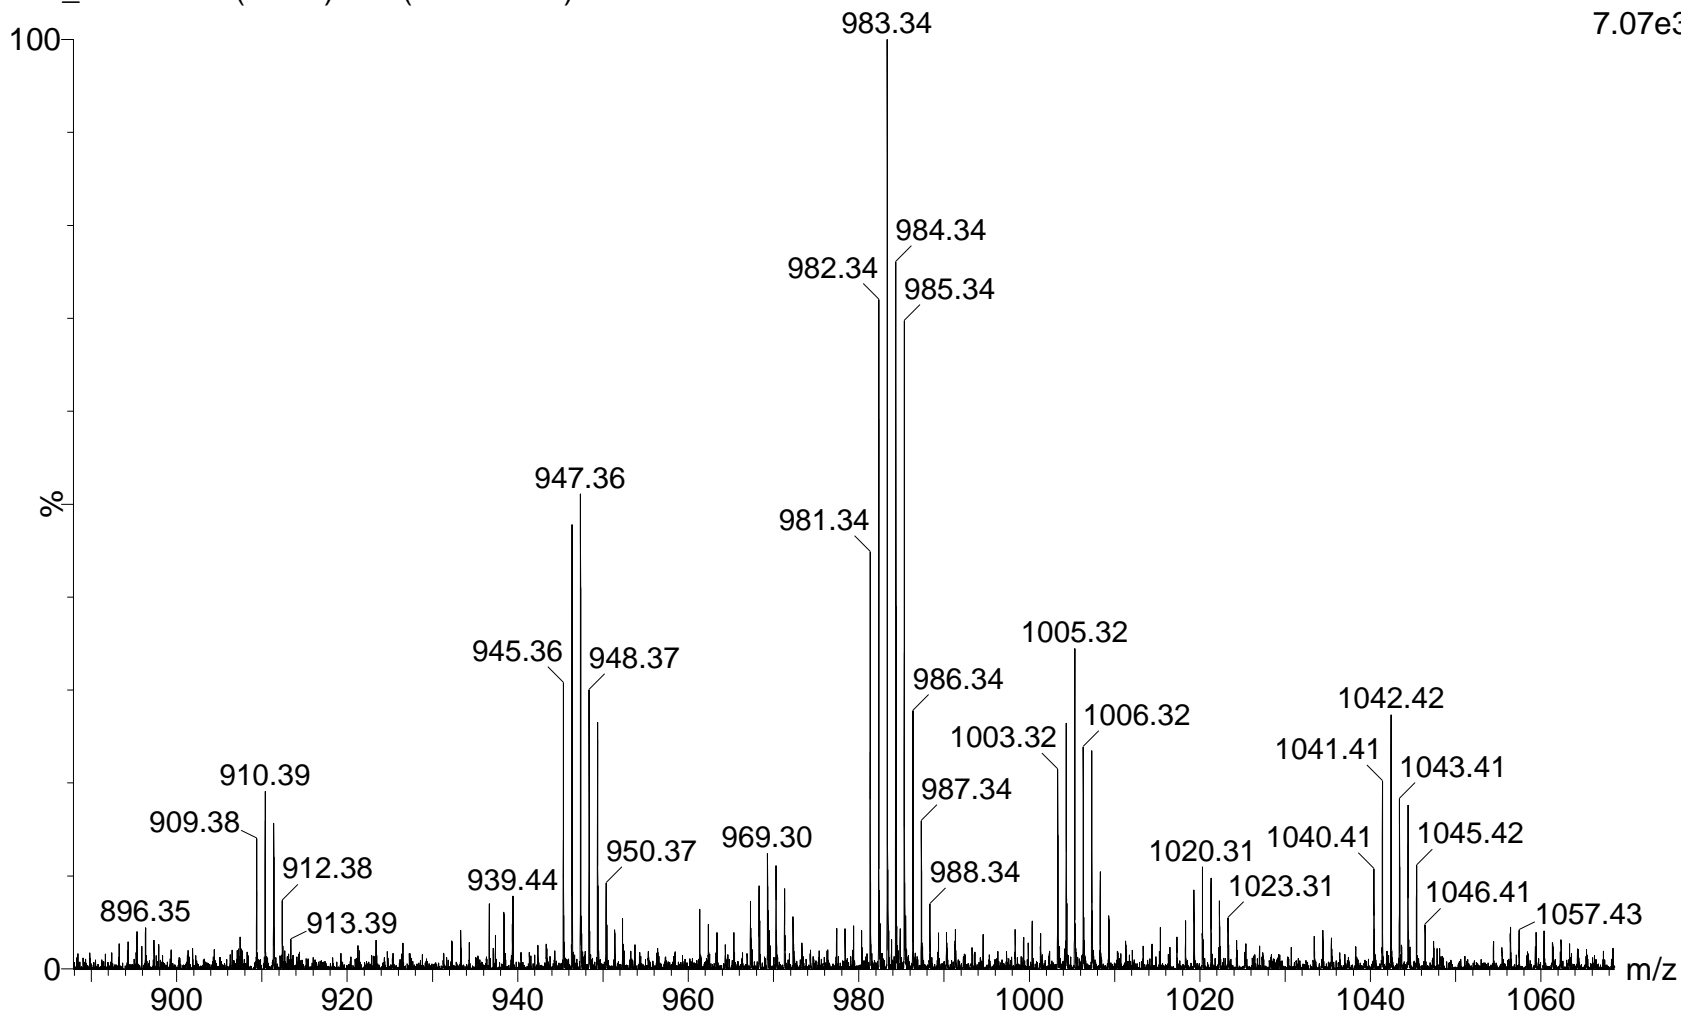

Figure S6d. MS spectrum of *trans*-[PtCl<sub>2</sub>L<sub>2</sub>] (**1**)

S8

umk\_ak621c 23 (0.248) Cm (16:26-3:11)

1: TOF MS ES+  
1.06e4

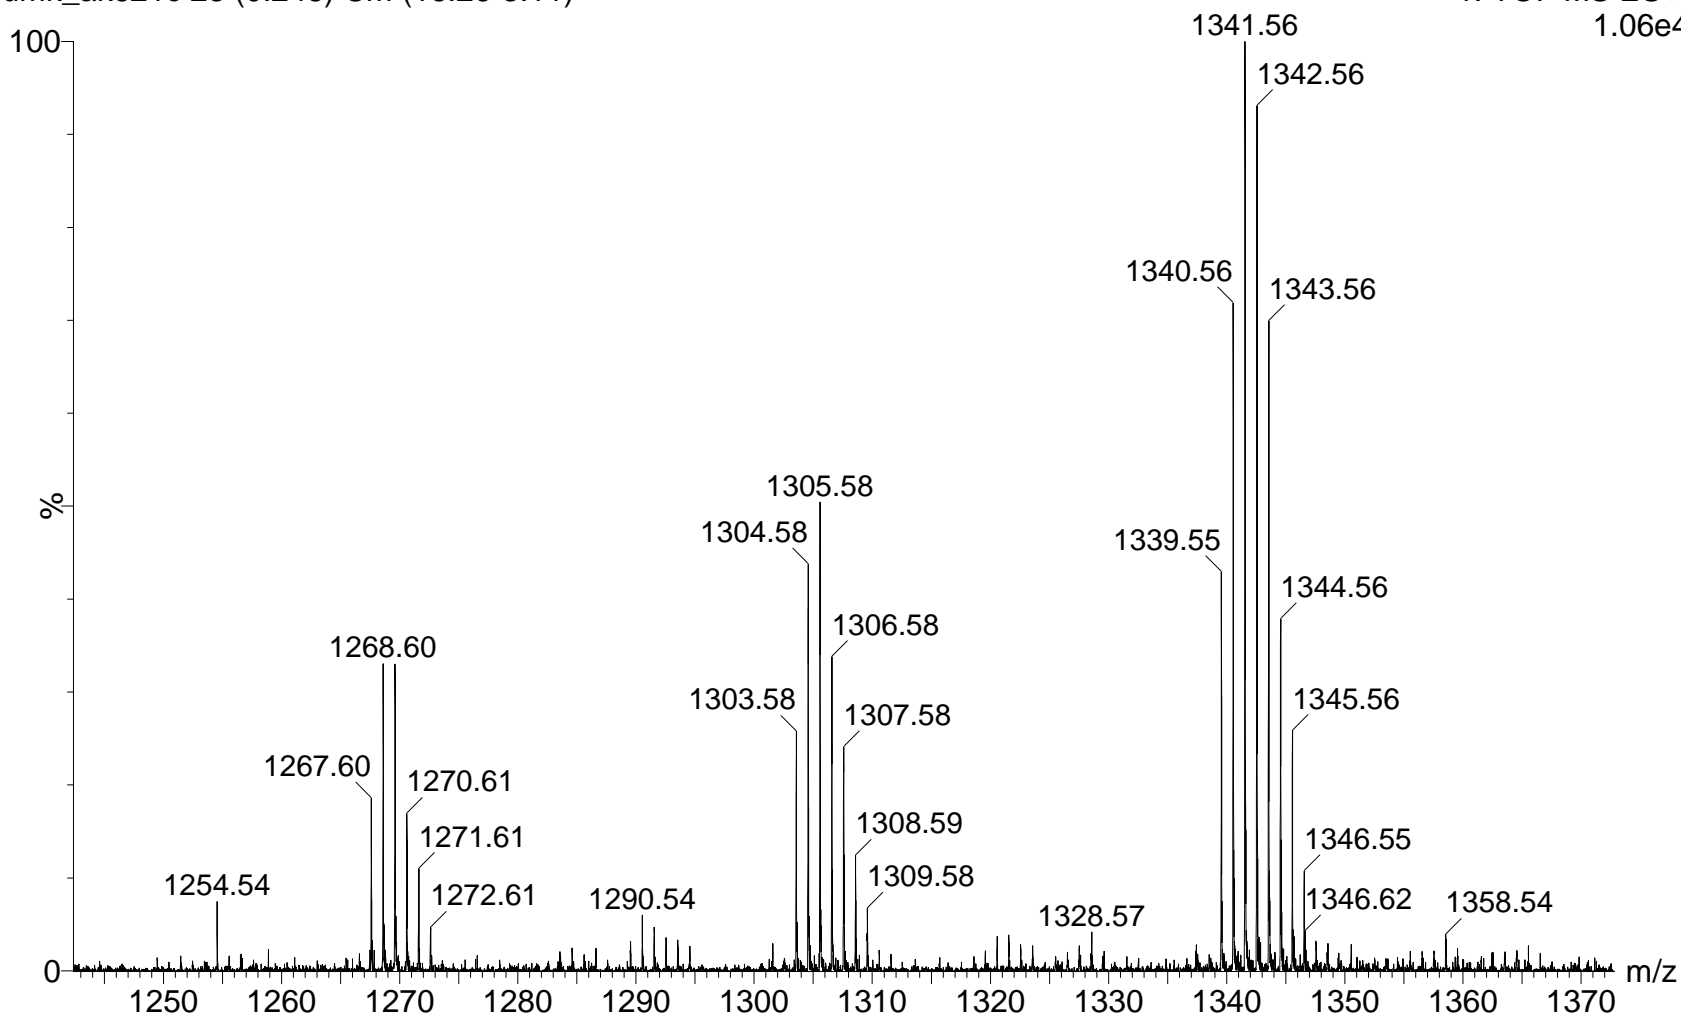

Figure S6e. MS spectrum of *trans*-[PtCl<sub>2</sub>L<sub>2</sub>] (**1**)

S8

umk\_ak621nega 22 (0.240) Cm (17:30-(3:14+72:93))

1: TOF MS ES-  
3.21e4

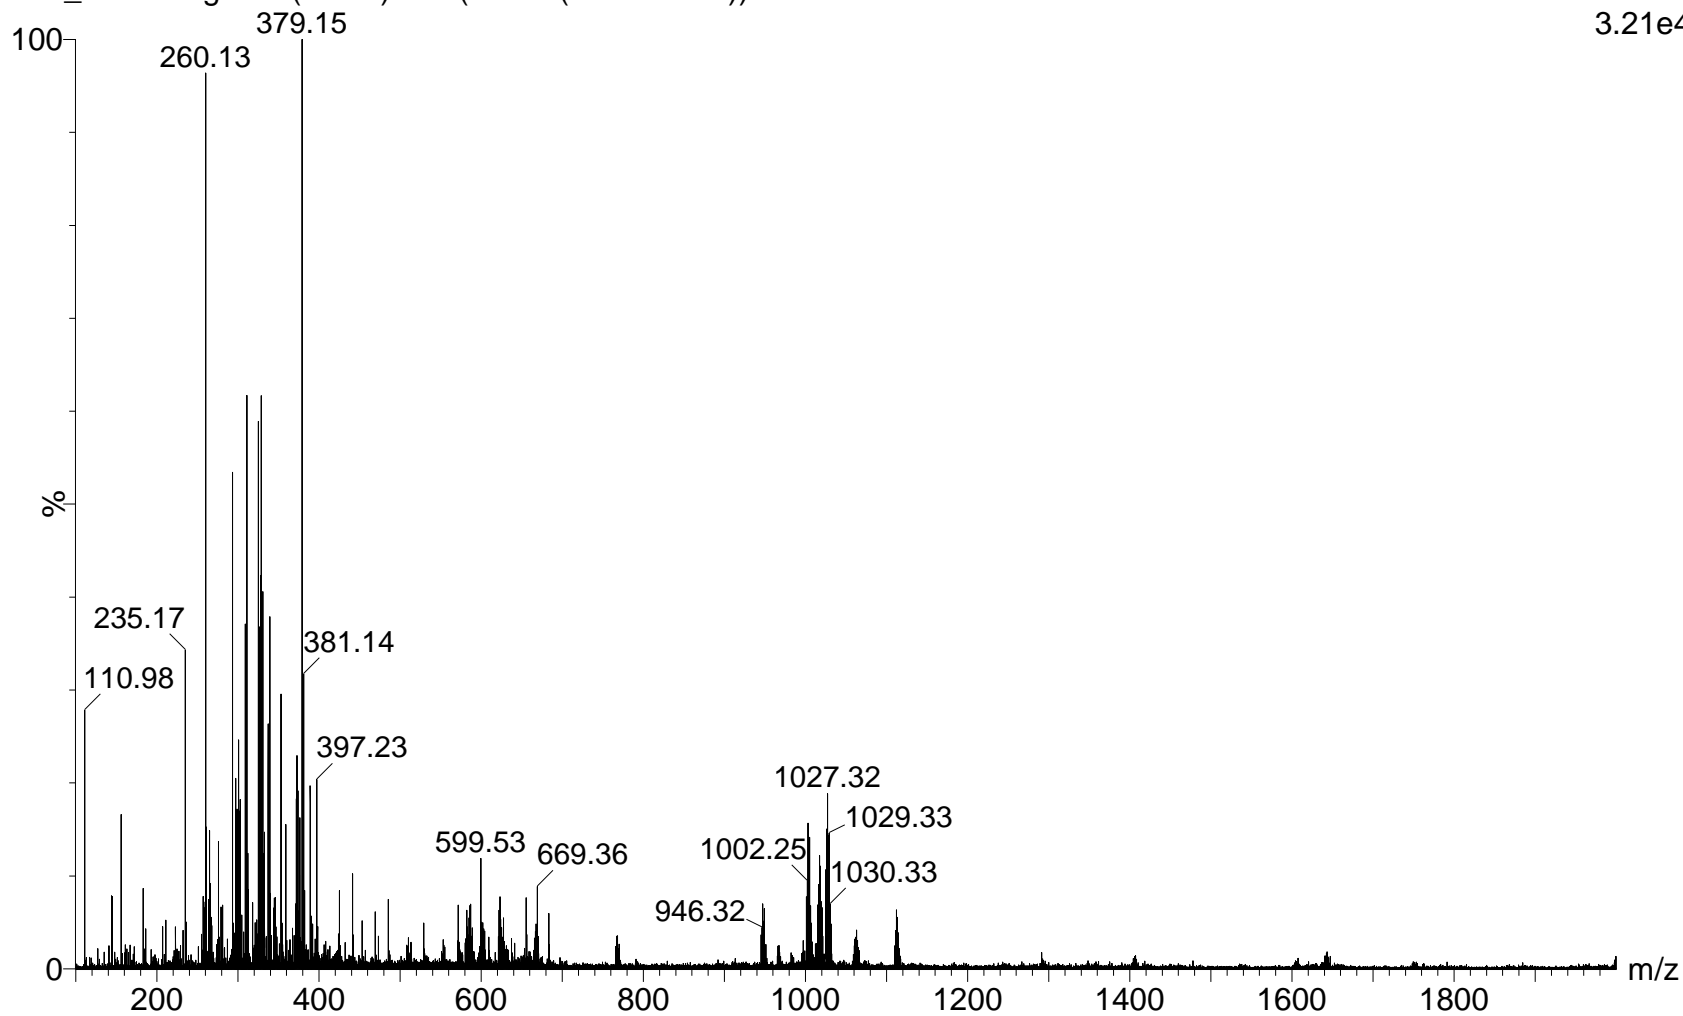

Figure S6f. MS spectrum of *trans*-[PtCl<sub>2</sub>L<sub>2</sub>] (**1**)

S8

umk\_ak621nega 22 (0.240) Cm (17:30-(3:14+72:93))

1: TOF MS ES-  
3.21e4

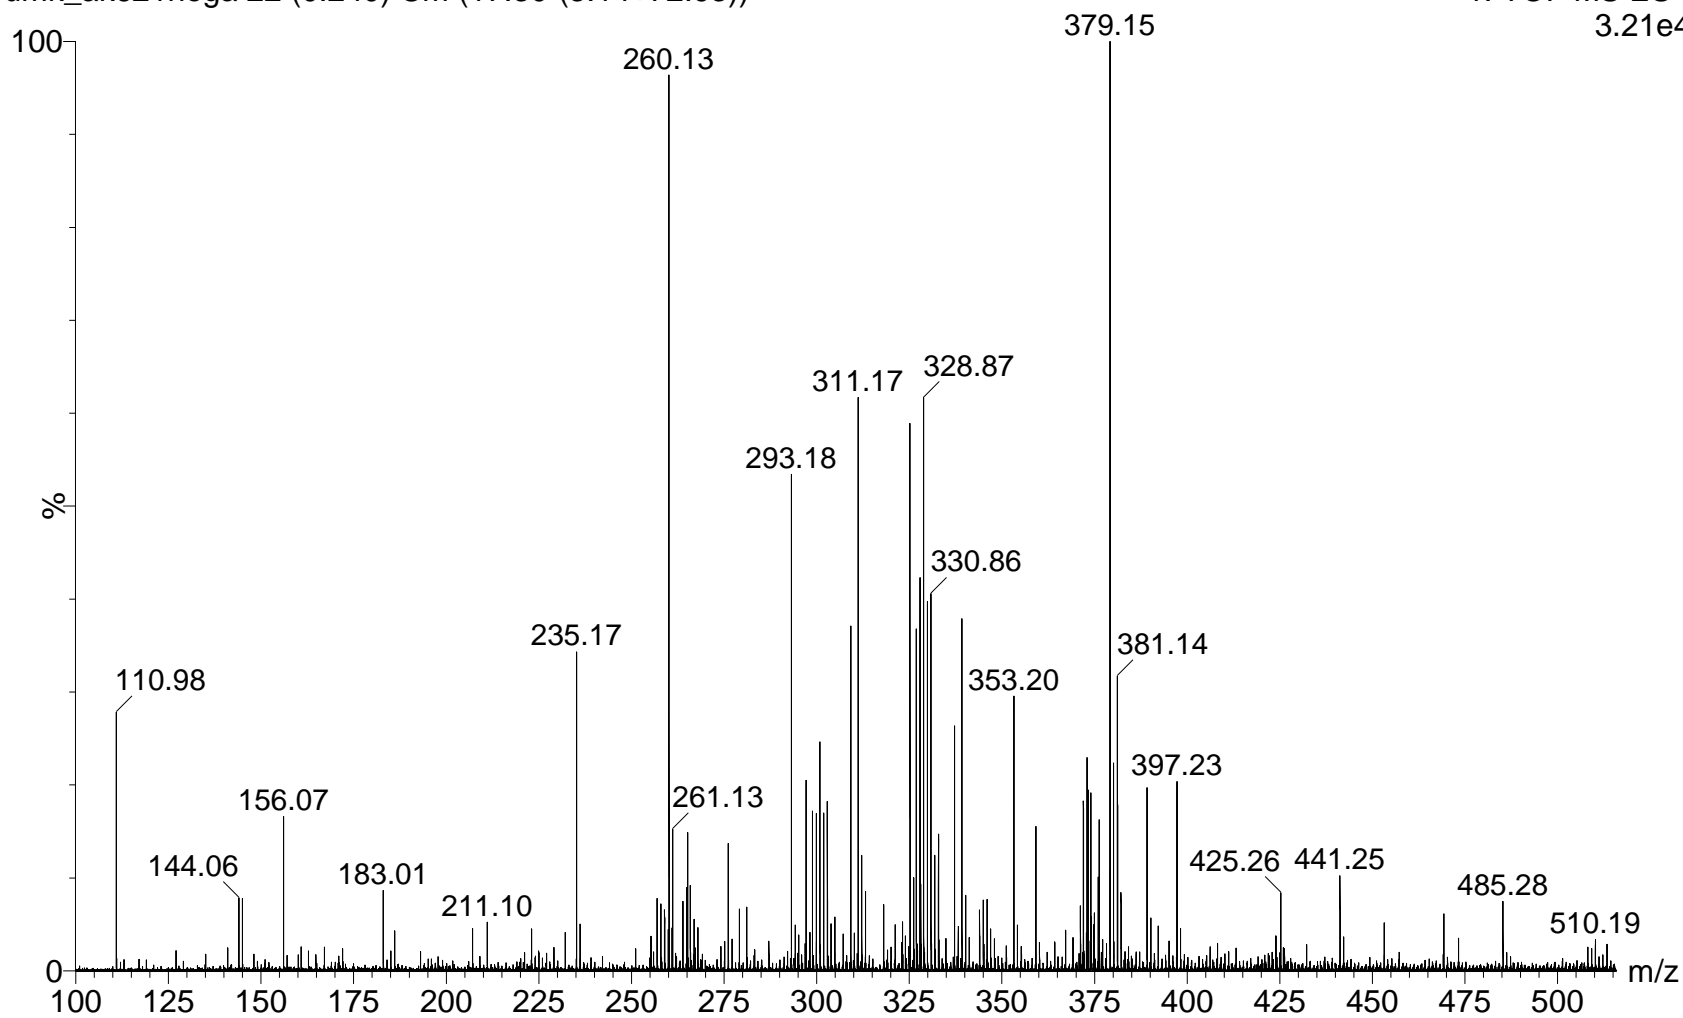

Figure S6g. MS spectrum of *trans*-[PtCl<sub>2</sub>L<sub>2</sub>] (**1**)

S8

umk\_ak621nega 22 (0.240) Cm (17:30-(3:14+72:93))

1: TOF MS ES-  
3.81e3

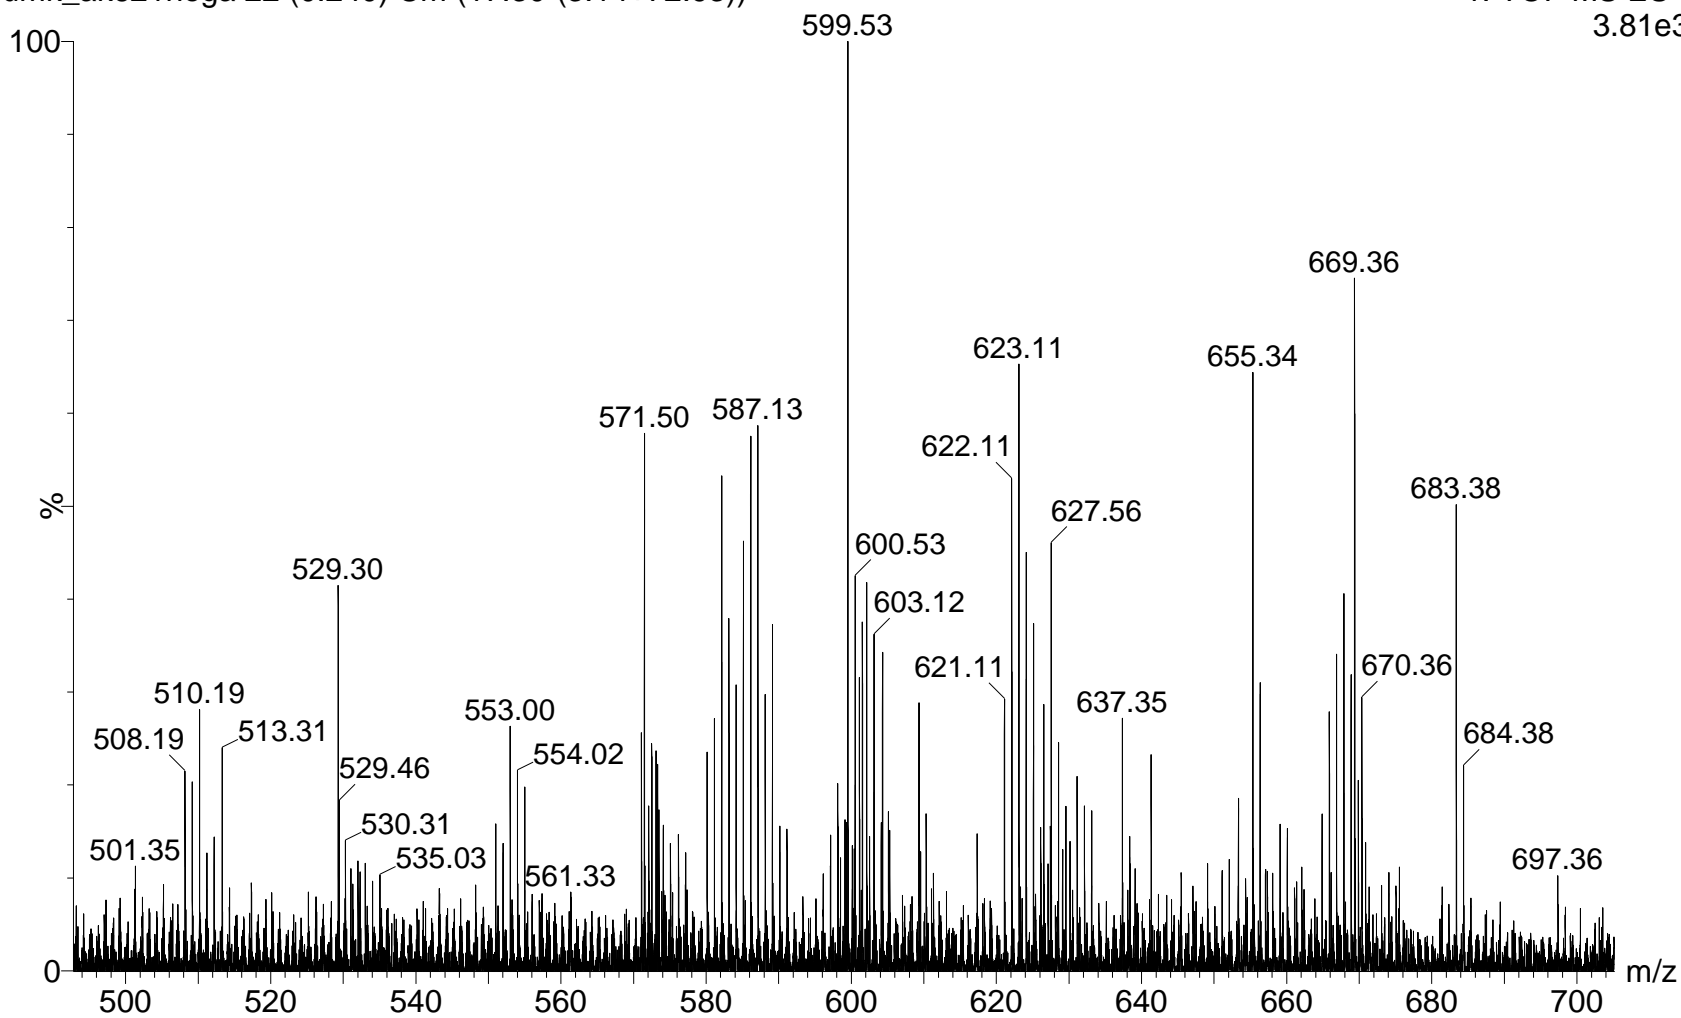

Figure S6h. MS spectrum of *trans*-[PtCl<sub>2</sub>L<sub>2</sub>] (**1**)



S8

umk\_ak621nega 22 (0.240) Cm (17:30-(3:14+72:93))

1: TOF MS ES-  
1.14e3

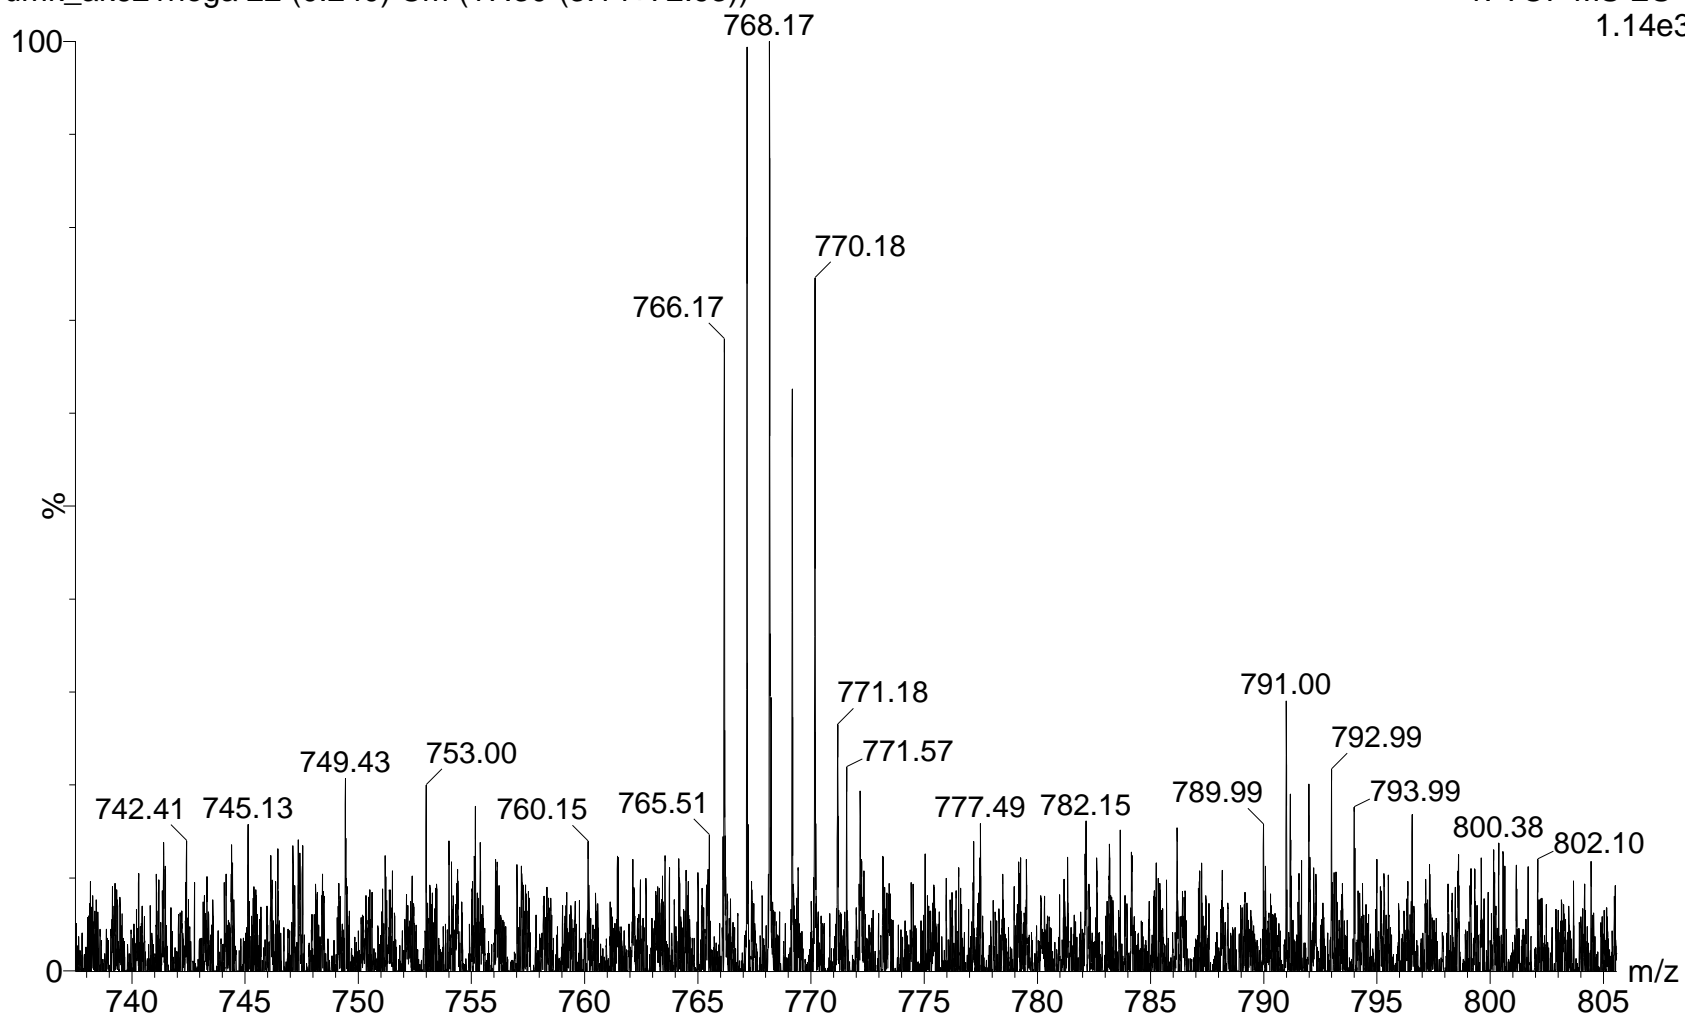

Figure S6i. MS spectrum of *trans*-[PtCl<sub>2</sub>L<sub>2</sub>] (**1**)

S8

umk\_ak621nega 22 (0.240) Cm (17:30-(3:14+72:93))

1: TOF MS ES-  
2.25e3

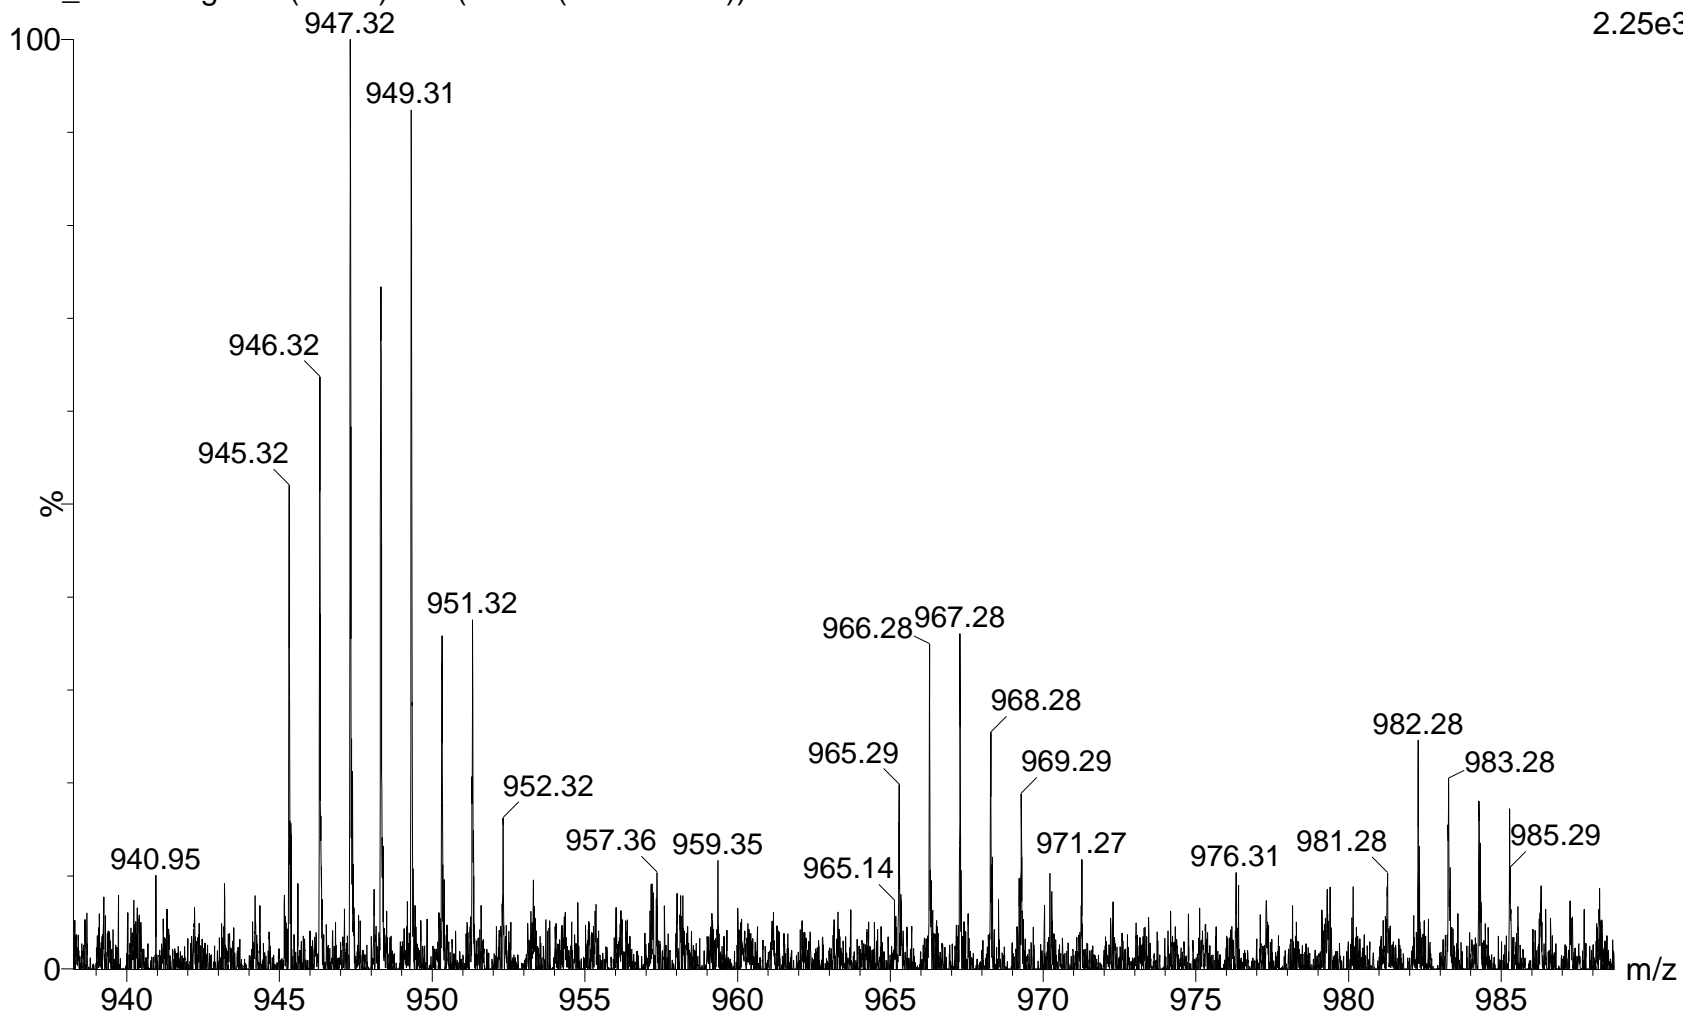

Figure S6j. MS spectrum of *trans*-[PtCl<sub>2</sub>L<sub>2</sub>] (**1**)

S8

umk\_ak621nega 22 (0.240) Cm (17:30-(3:14+72:93))

1: TOF MS ES-  
6.05e3

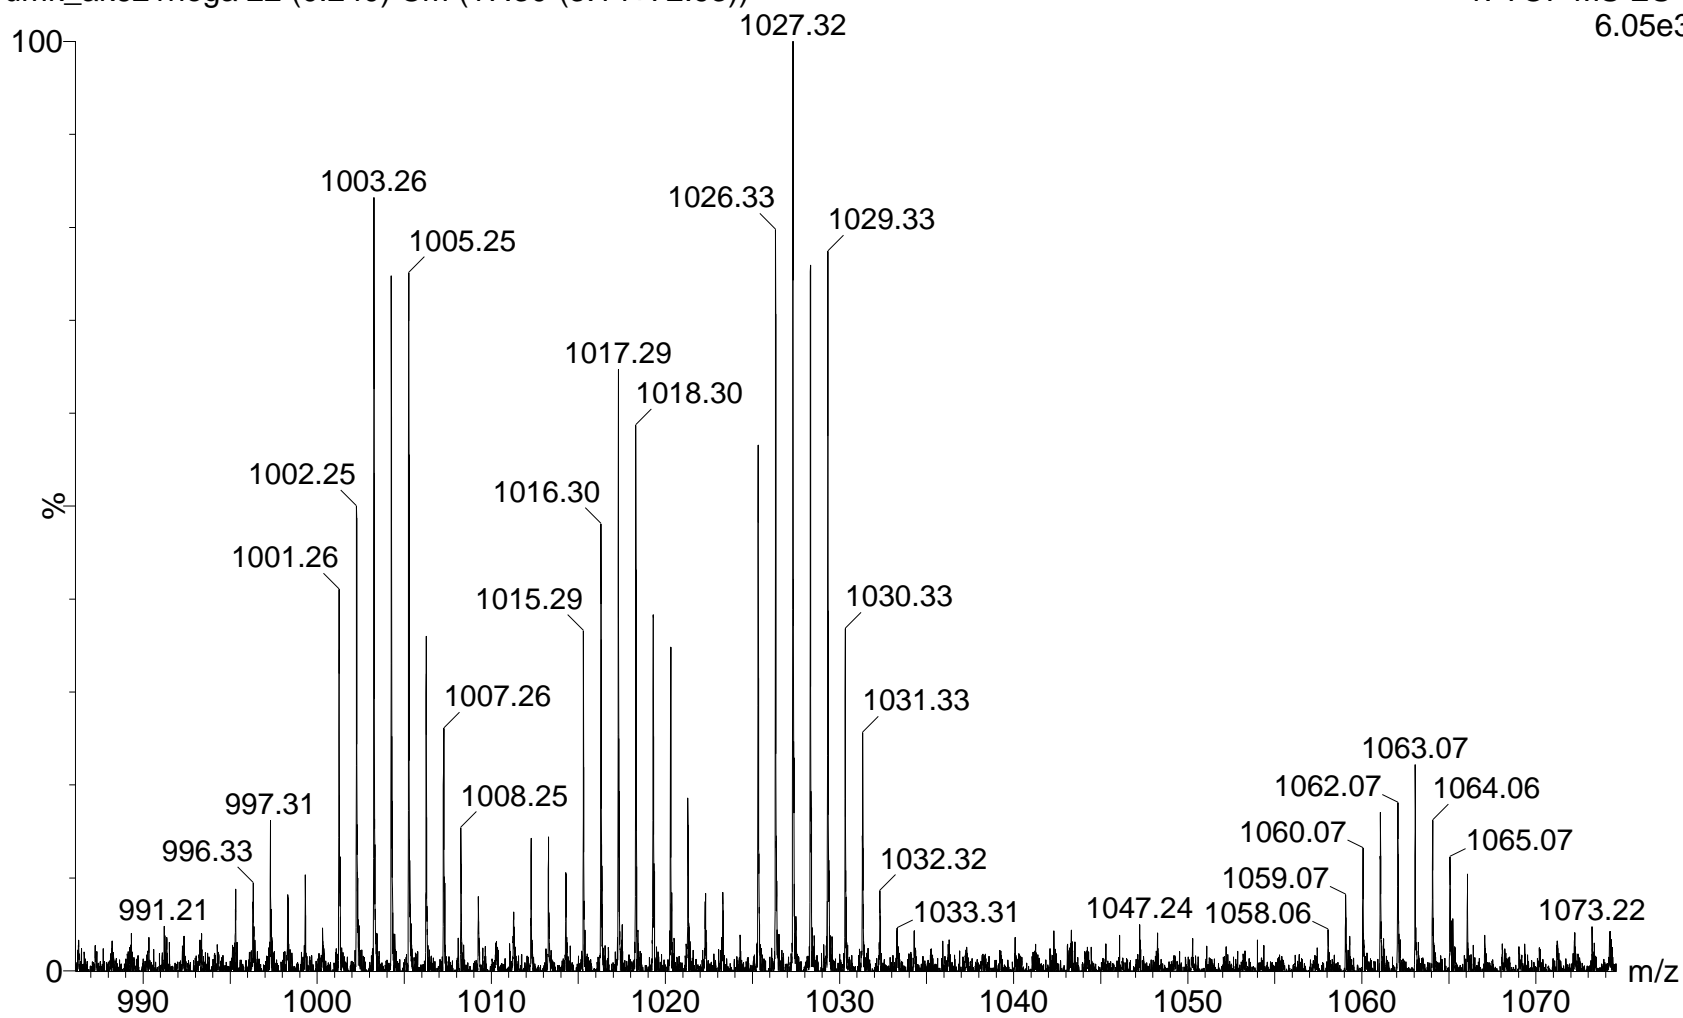

Figure S6k. MS spectrum of *trans*-[PtCl<sub>2</sub>L<sub>2</sub>] (**1**)

S8

umk\_ak621nega 22 (0.240) Cm (17:30-(3:14+72:93))

1: TOF MS ES-  
2.04e3

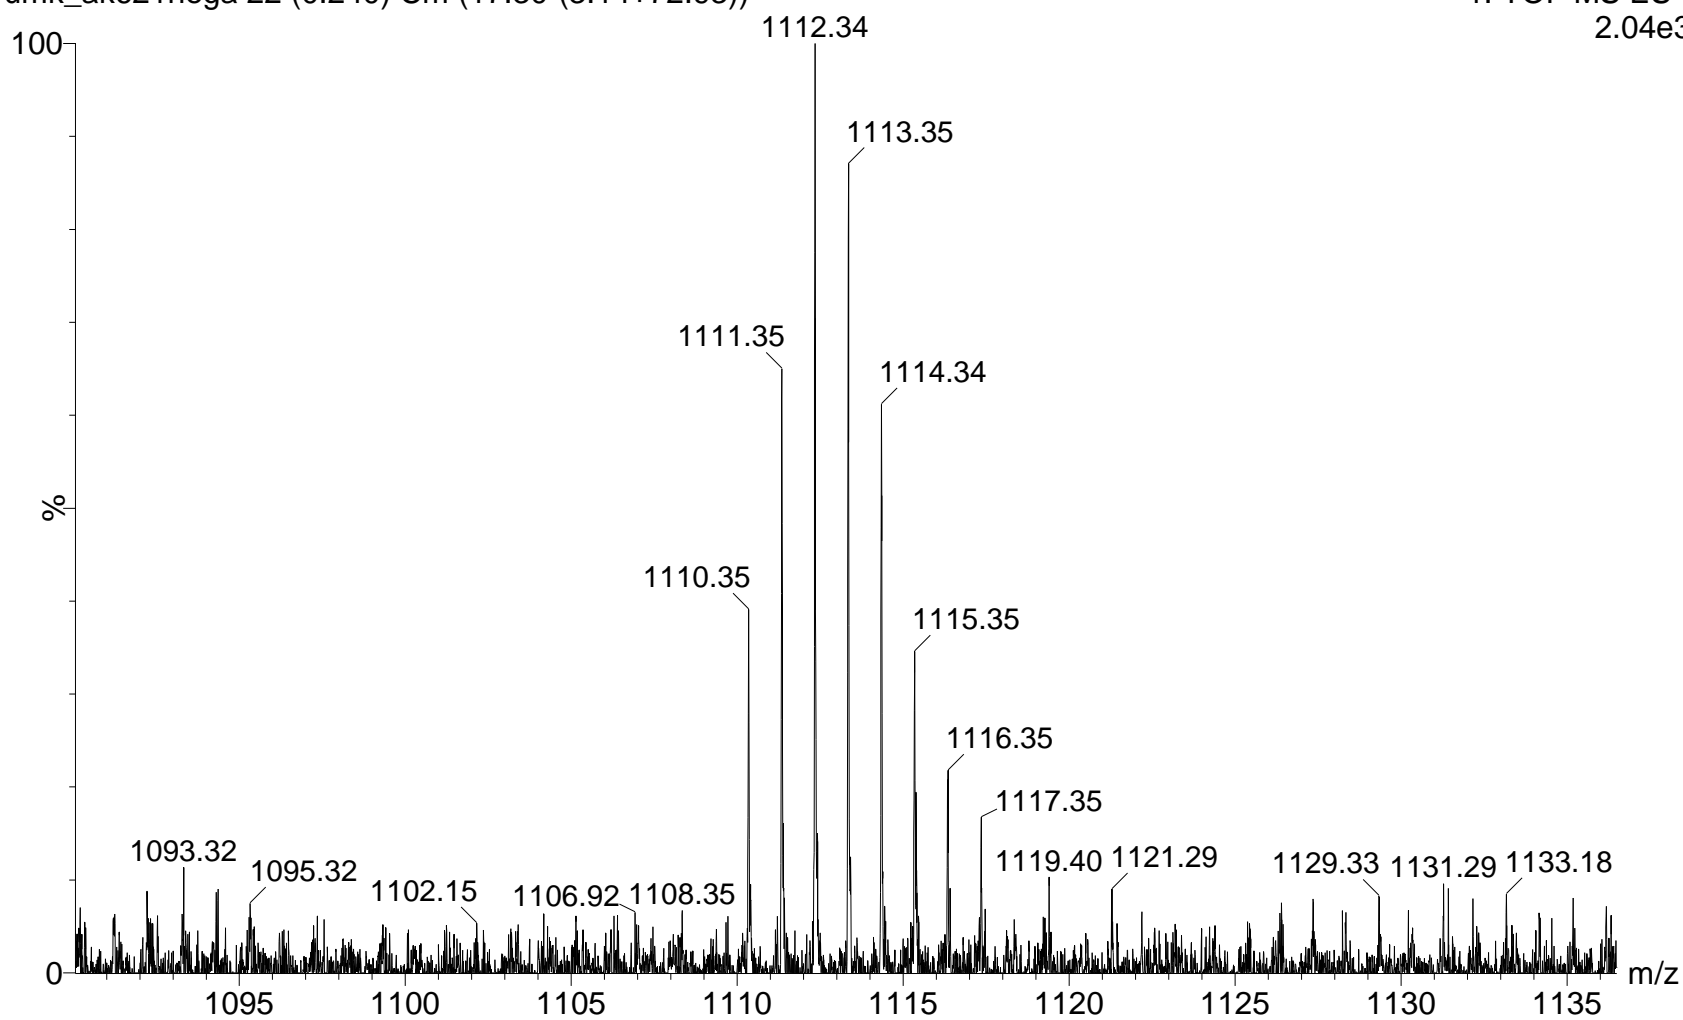

Figure S61. MS spectrum of *trans*-[PtCl<sub>2</sub>L<sub>2</sub>] (**1**)
