# Supplementary material for: Unveiling the promising in vitro anticancer activity of lipophilic platinum(ii) complexes containing (1S,4R,5R)-4-(4-phenyl-1H-1,2,3-triazol-1-yl)-2-((S)-1-phenylethyl)-2-azabicyclo[3.2.1]octane: a spectroscopic characterization and DFT calculation
Source: Royal Society of Chemistry journal article supplement (doi:10.1039/d4dt03021d), 2025-01-01
Supplement: d4dt03021d10.pdf [file d4dt03021d10.pdf]

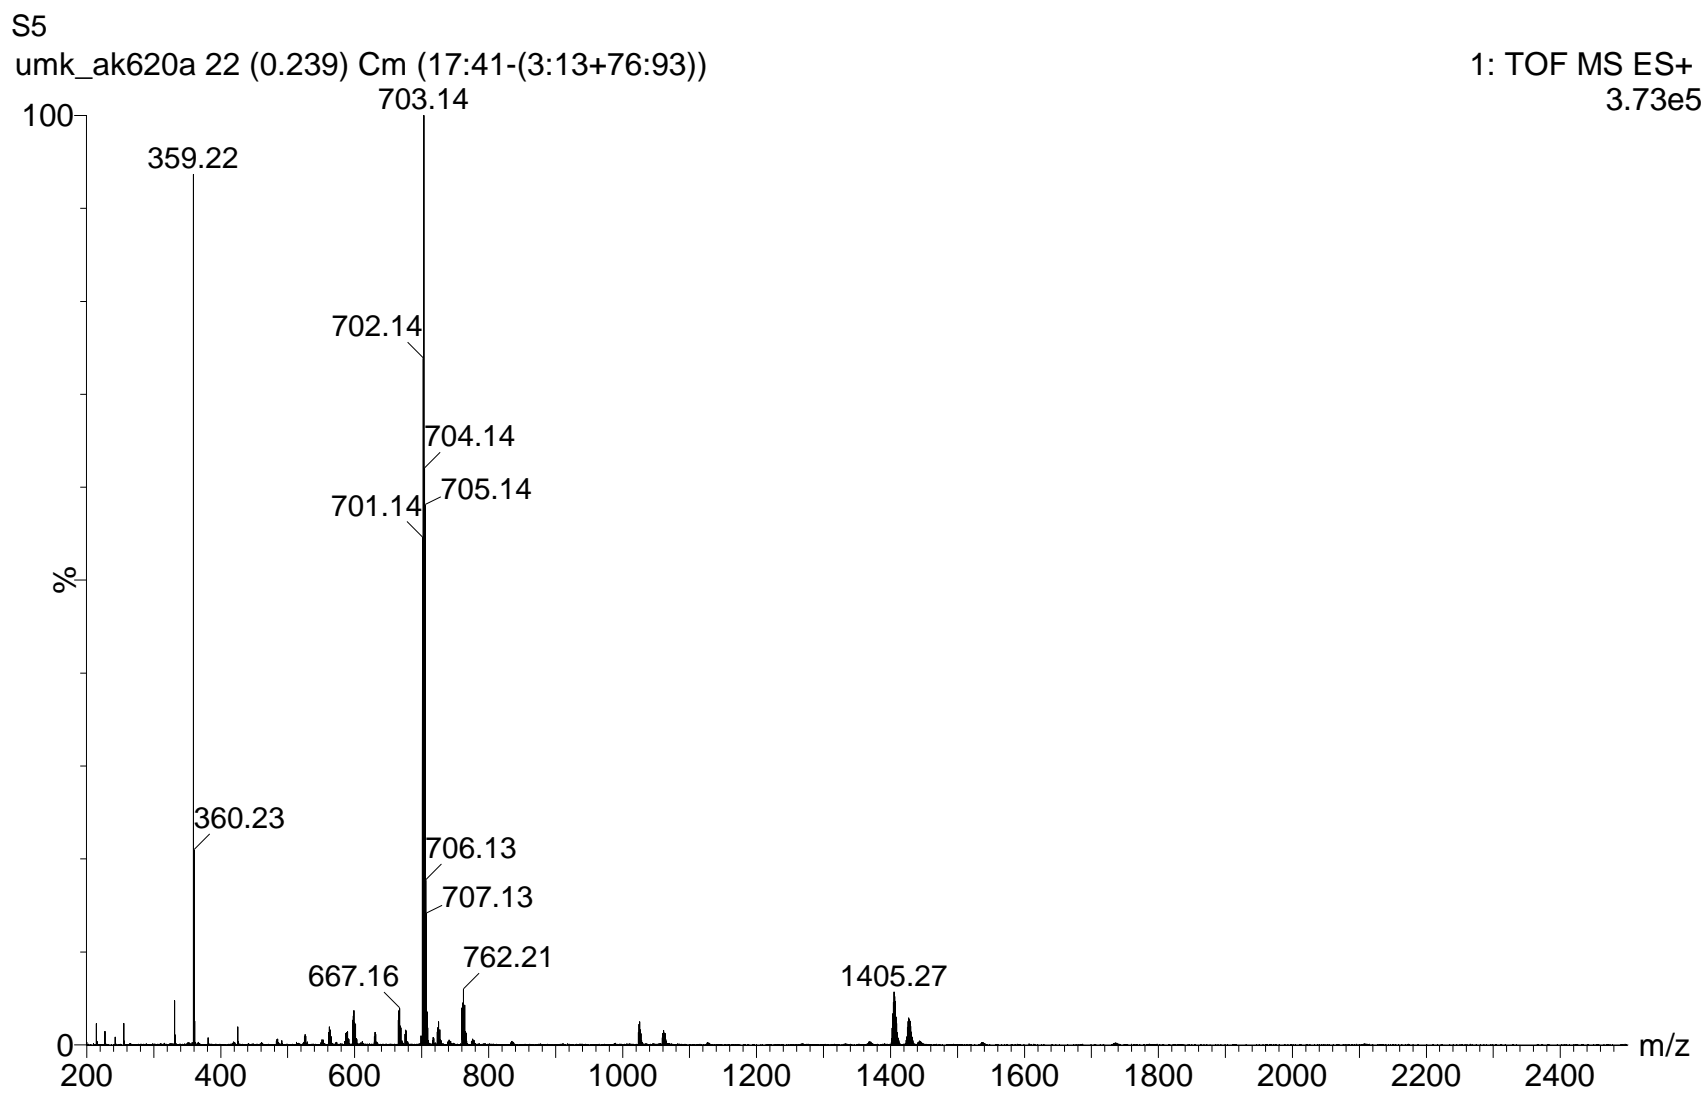

Figure S7a. Spectrum of *cis*-[PtCl<sub>2</sub>(DMSO)L] (**2**)

S5

umk\_ak620a 22 (0.239) Cm (17:41-(3:13+76:93))

1: TOF MS ES+  
3.50e5

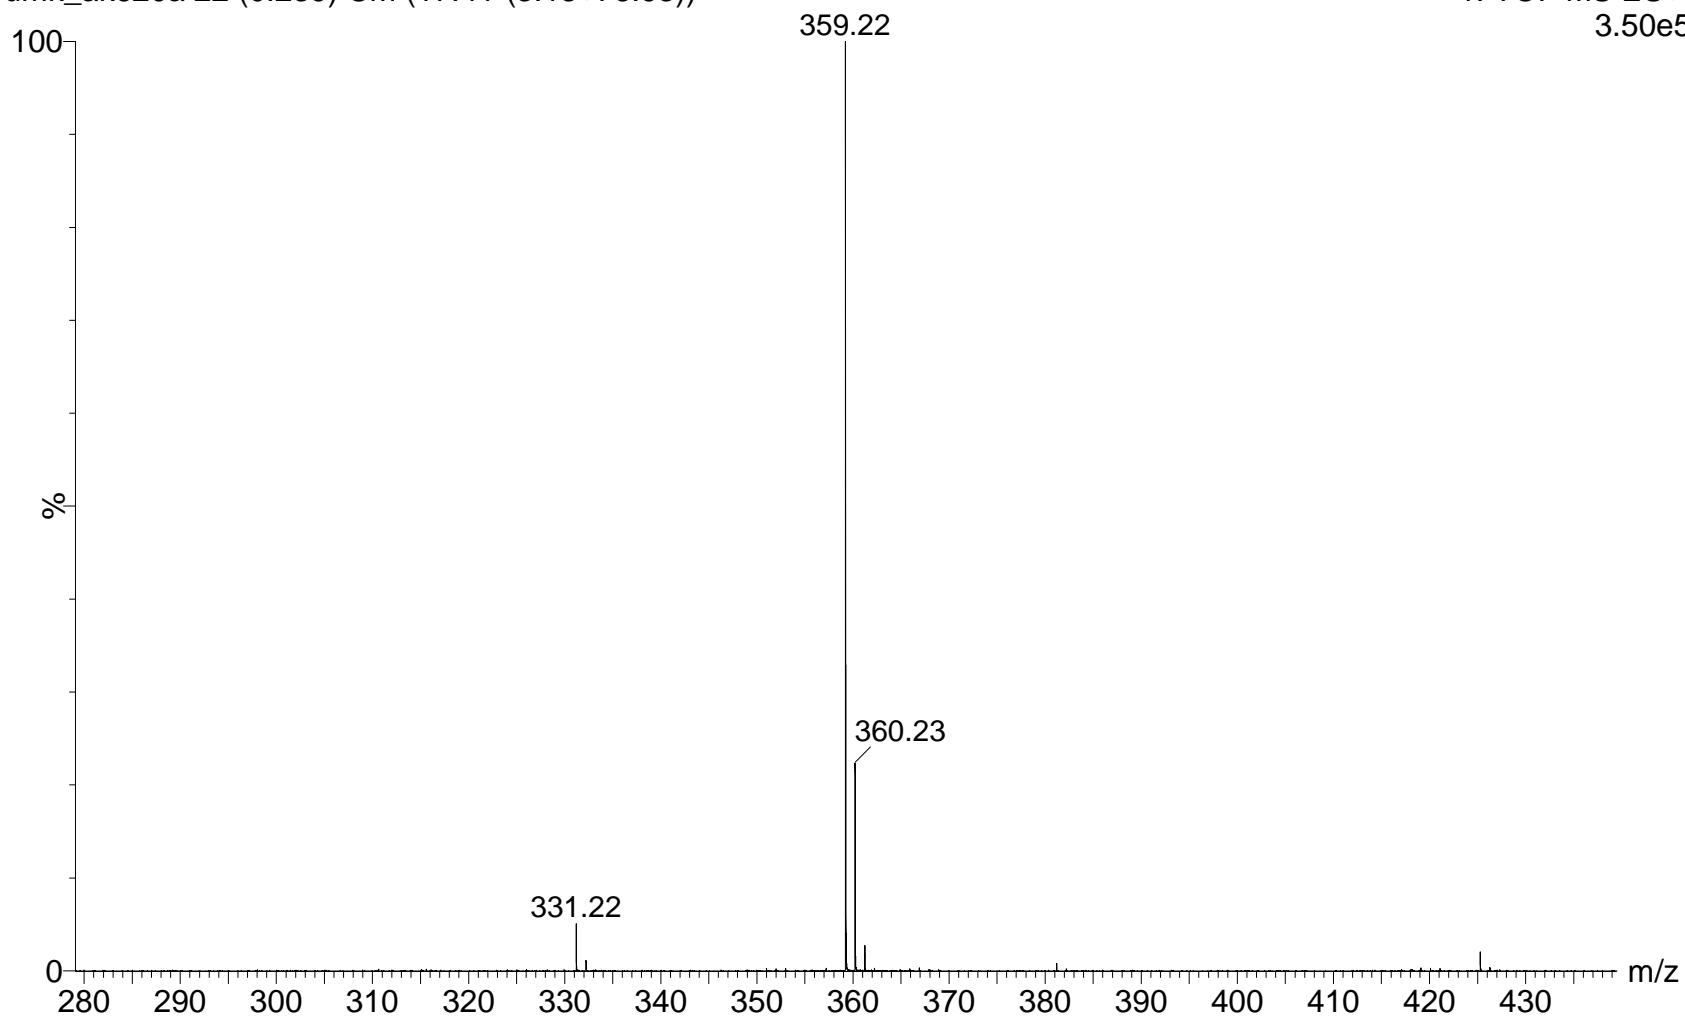

Figure S7b. Spectrum of *cis*-[PtCl<sub>2</sub>(DMSO)L] (2)

S5

umk\_ak620a 22 (0.239) Cm (17:41-(3:13+76:93))

1: TOF MS ES+  
1.38e4

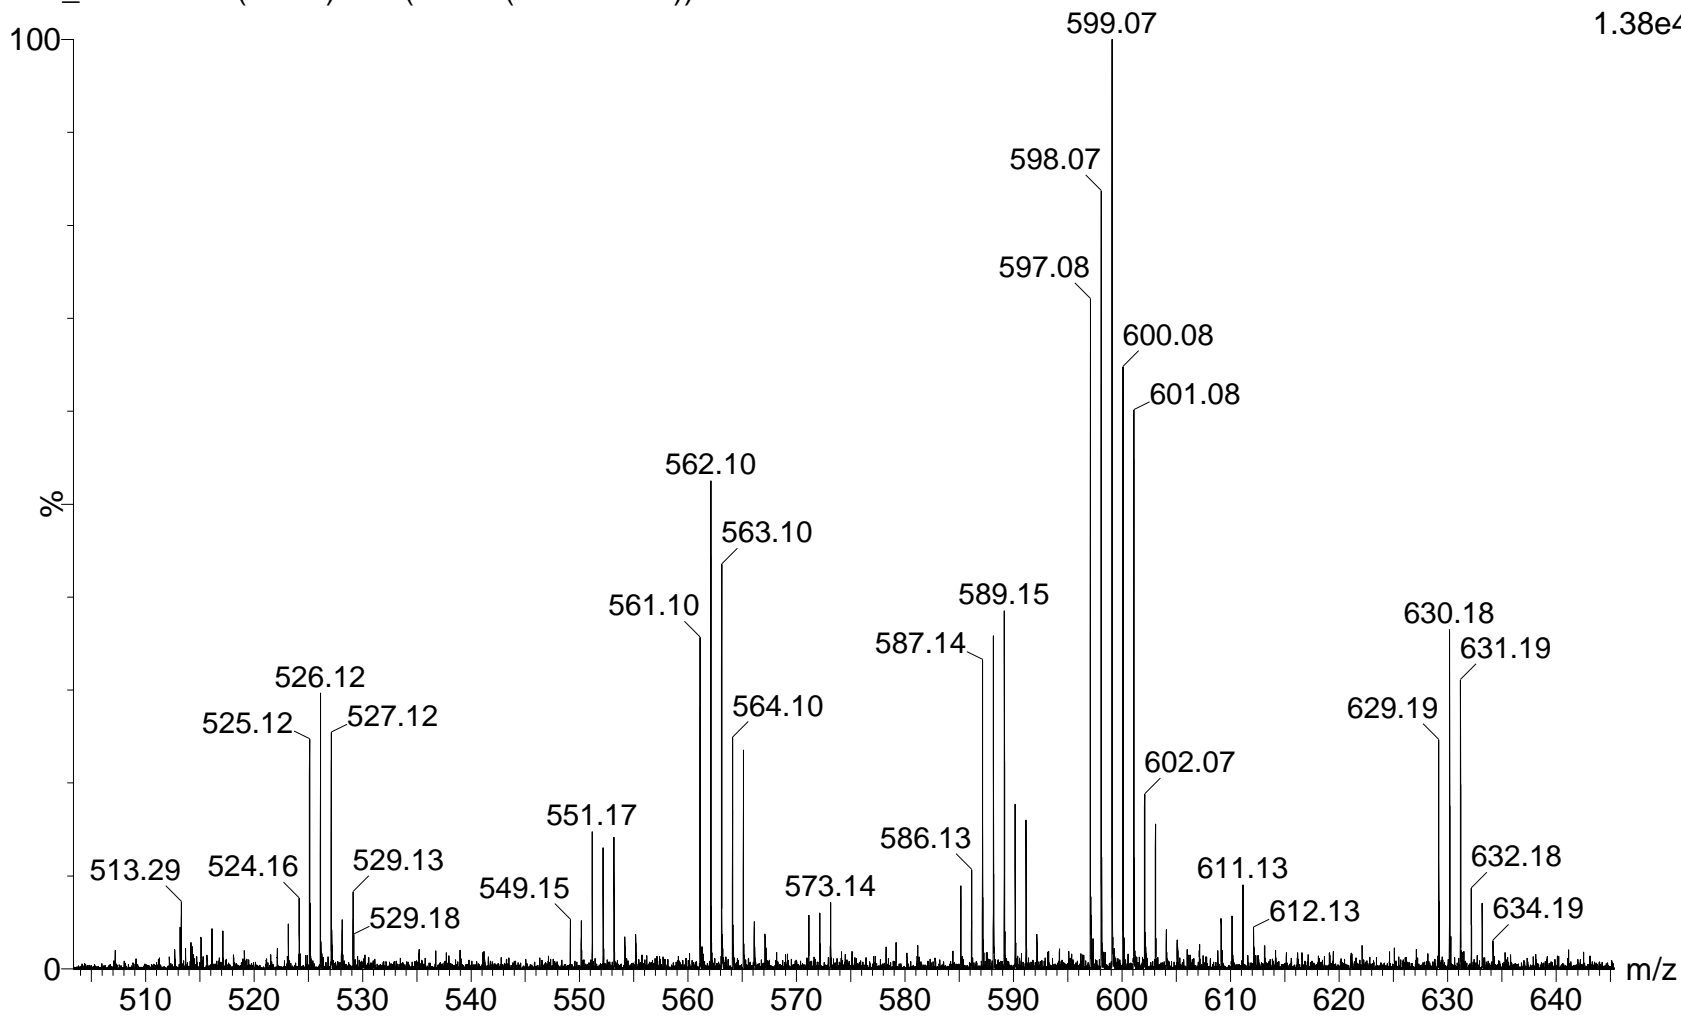

Figure S7c. Spectrum of *cis*-[PtCl<sub>2</sub>(DMSO)L] (2)

S5

umk\_ak620a 22 (0.239) Cm (17:41-(3:13+76:93))

1: TOF MS ES+  
3.73e5

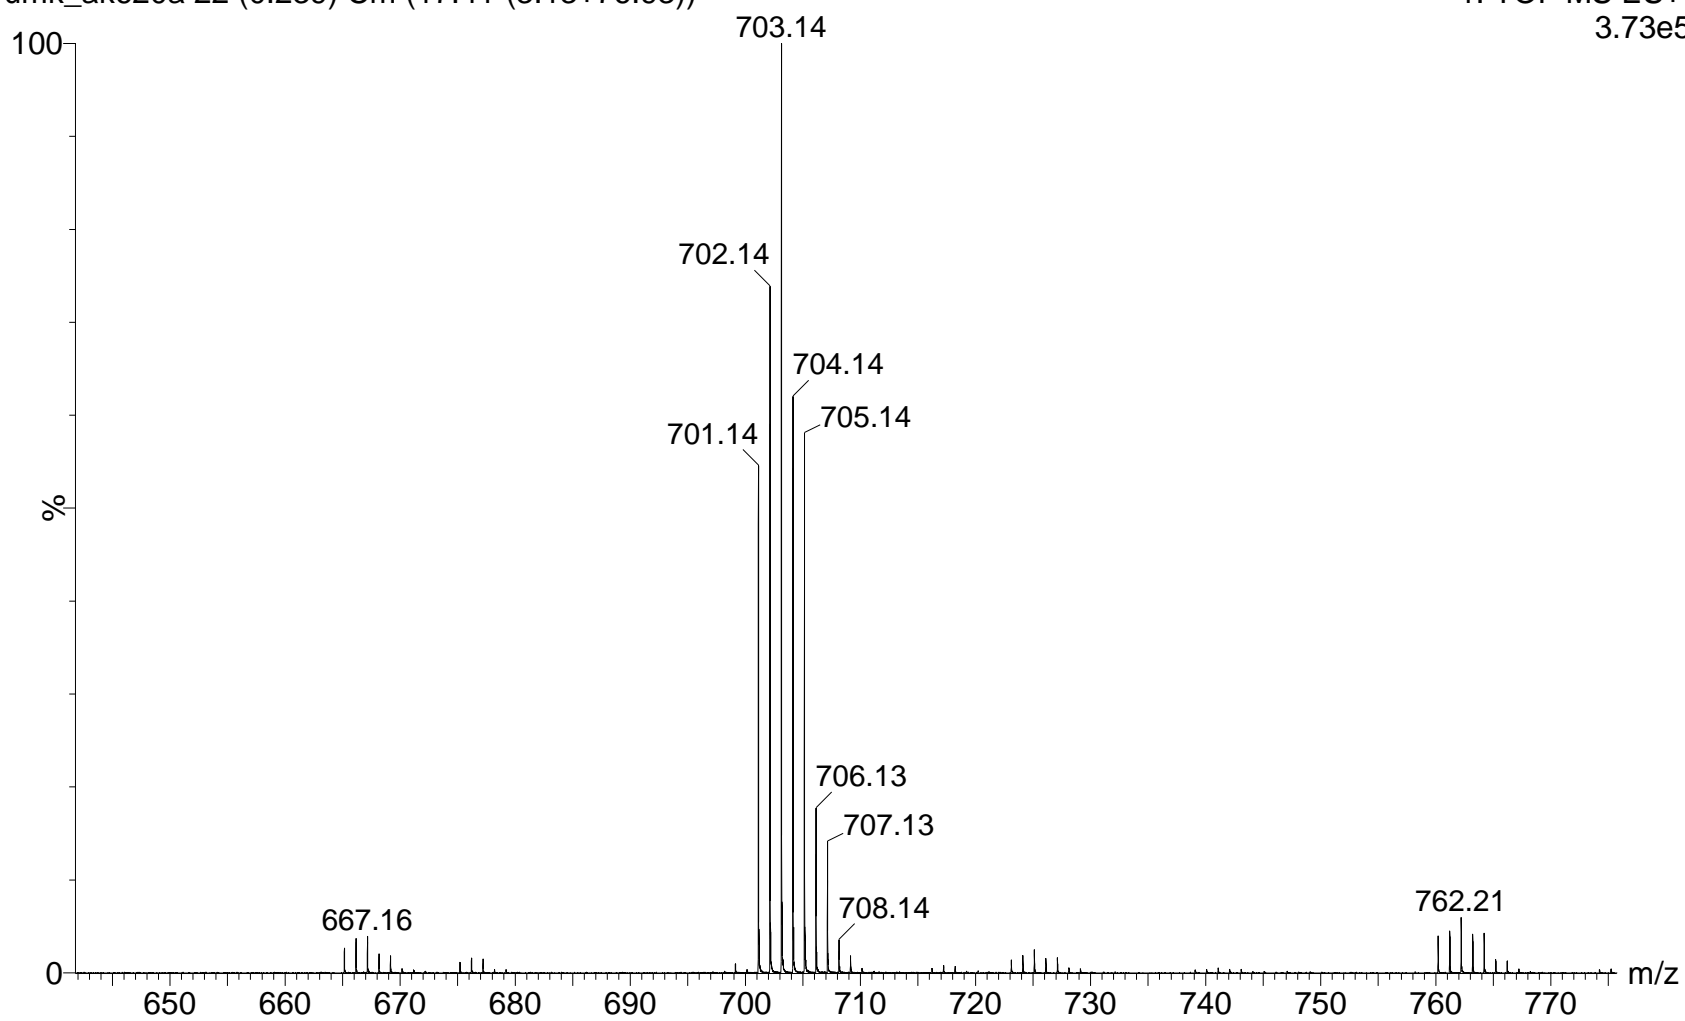

Figure S7d. Spectrum of *cis*-[PtCl<sub>2</sub>(DMSO)L] (2)

S5

umk\_ak620a 22 (0.239) Cm (17:41-(3:13+76:93))

1: TOF MS ES+  
9.21e3

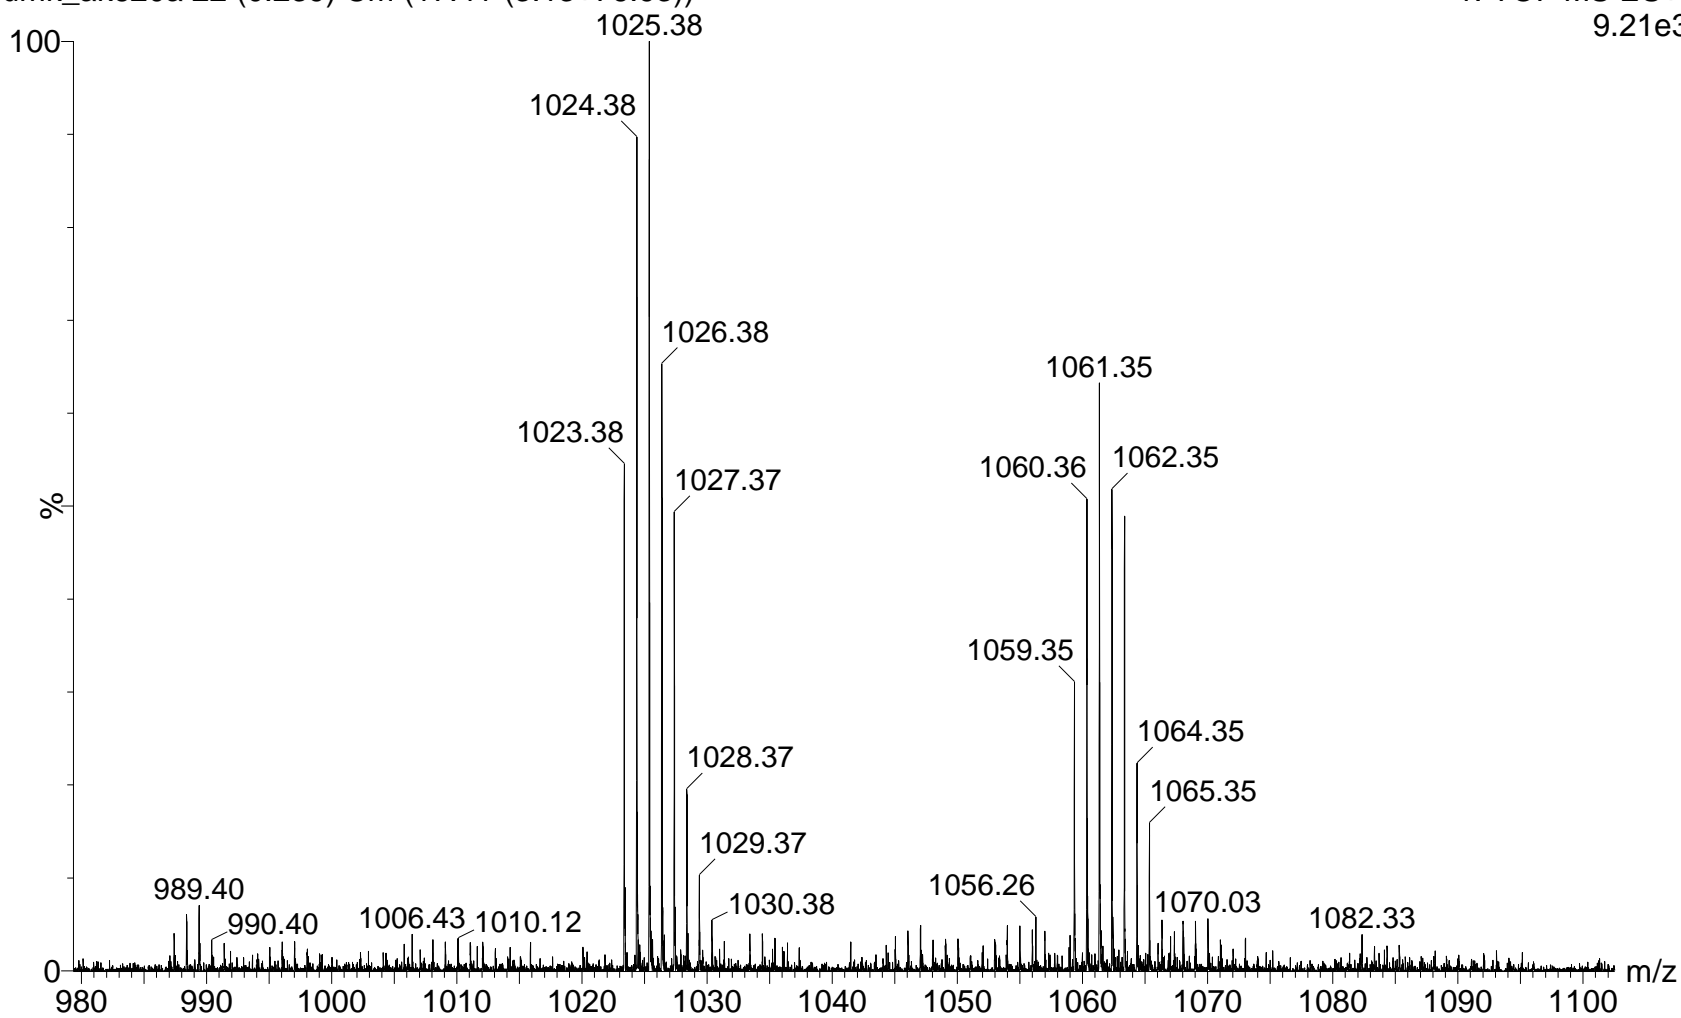

Figure S7e. Spectrum of *cis*-[PtCl<sub>2</sub>(DMSO)L] (2)

S5

umk\_ak620a 22 (0.239) Cm (17:41-(3:13+76:93))

1: TOF MS ES+  
2.12e4

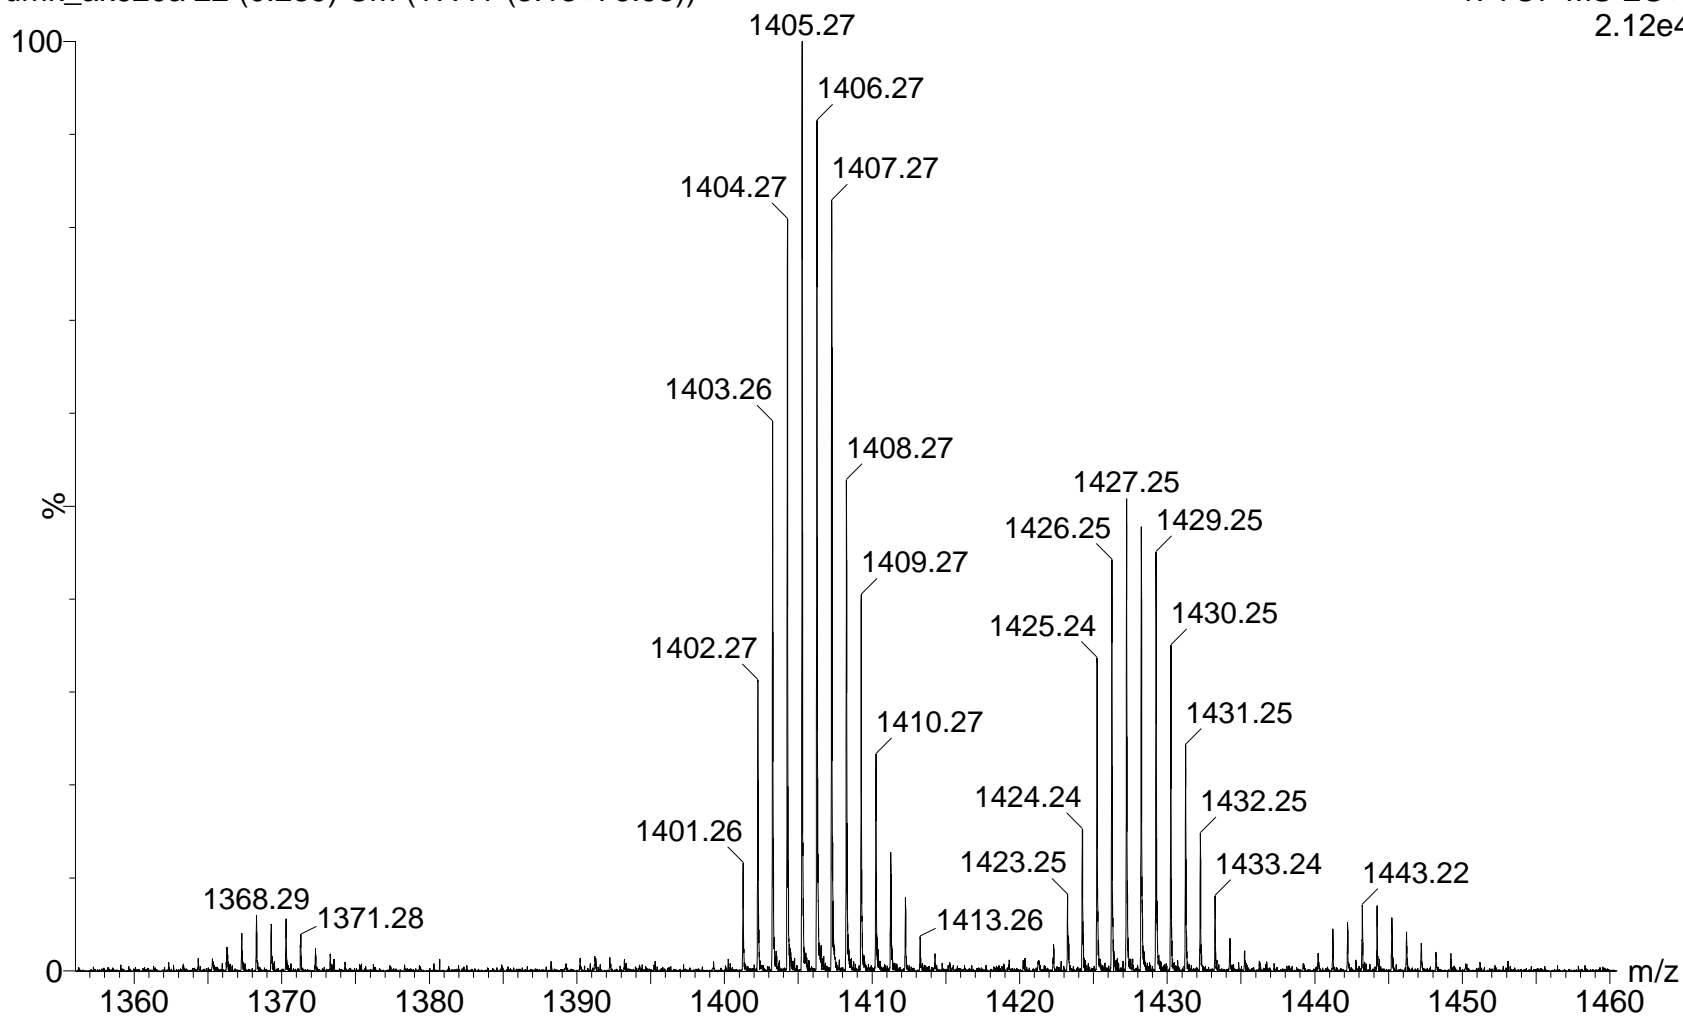

Figure S7f. Spectrum of *cis*-[PtCl<sub>2</sub>(DMSO)L] (**2**)

S5

umk\_ak620nega 22 (0.240) Cm (17:43-(5:15+74:91))

1: TOF MS ES-  
1.54e5

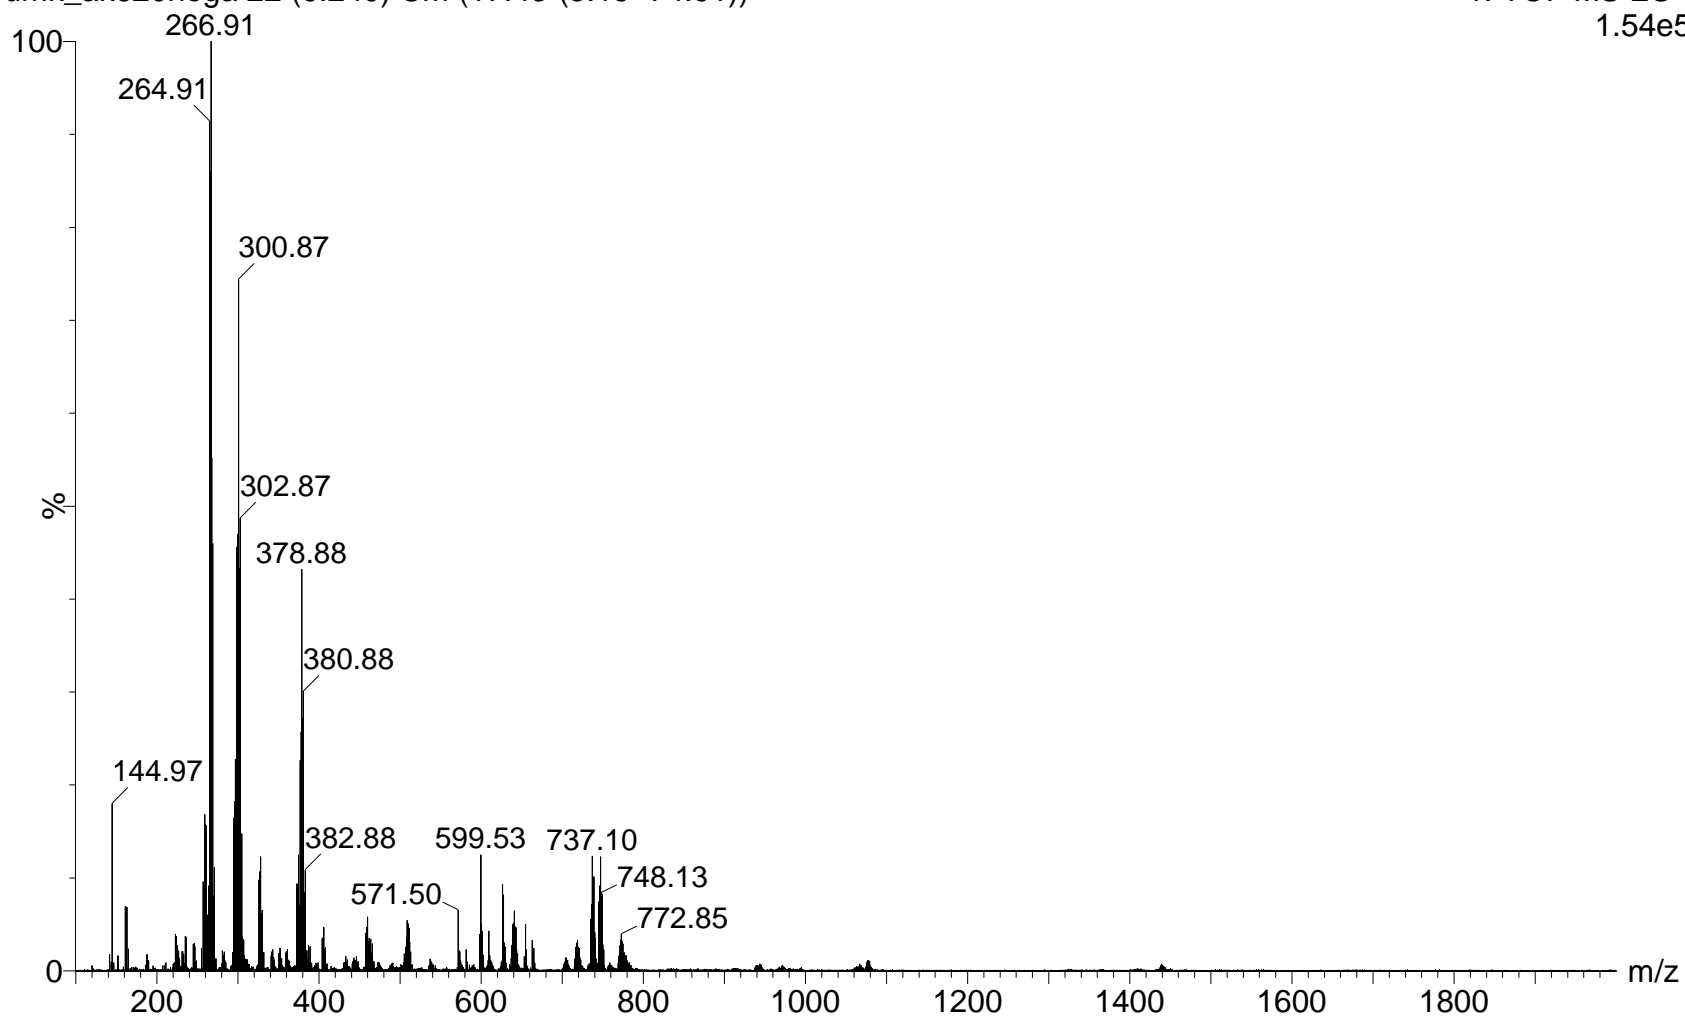

Figure S7g. Spectrum of *cis*-[PtCl<sub>2</sub>(DMSO)L] (2)

S5

umk\_ak620nega 22 (0.240) Cm (17:43-(5:15+74:91))

1: TOF MS ES-  
1.54e5

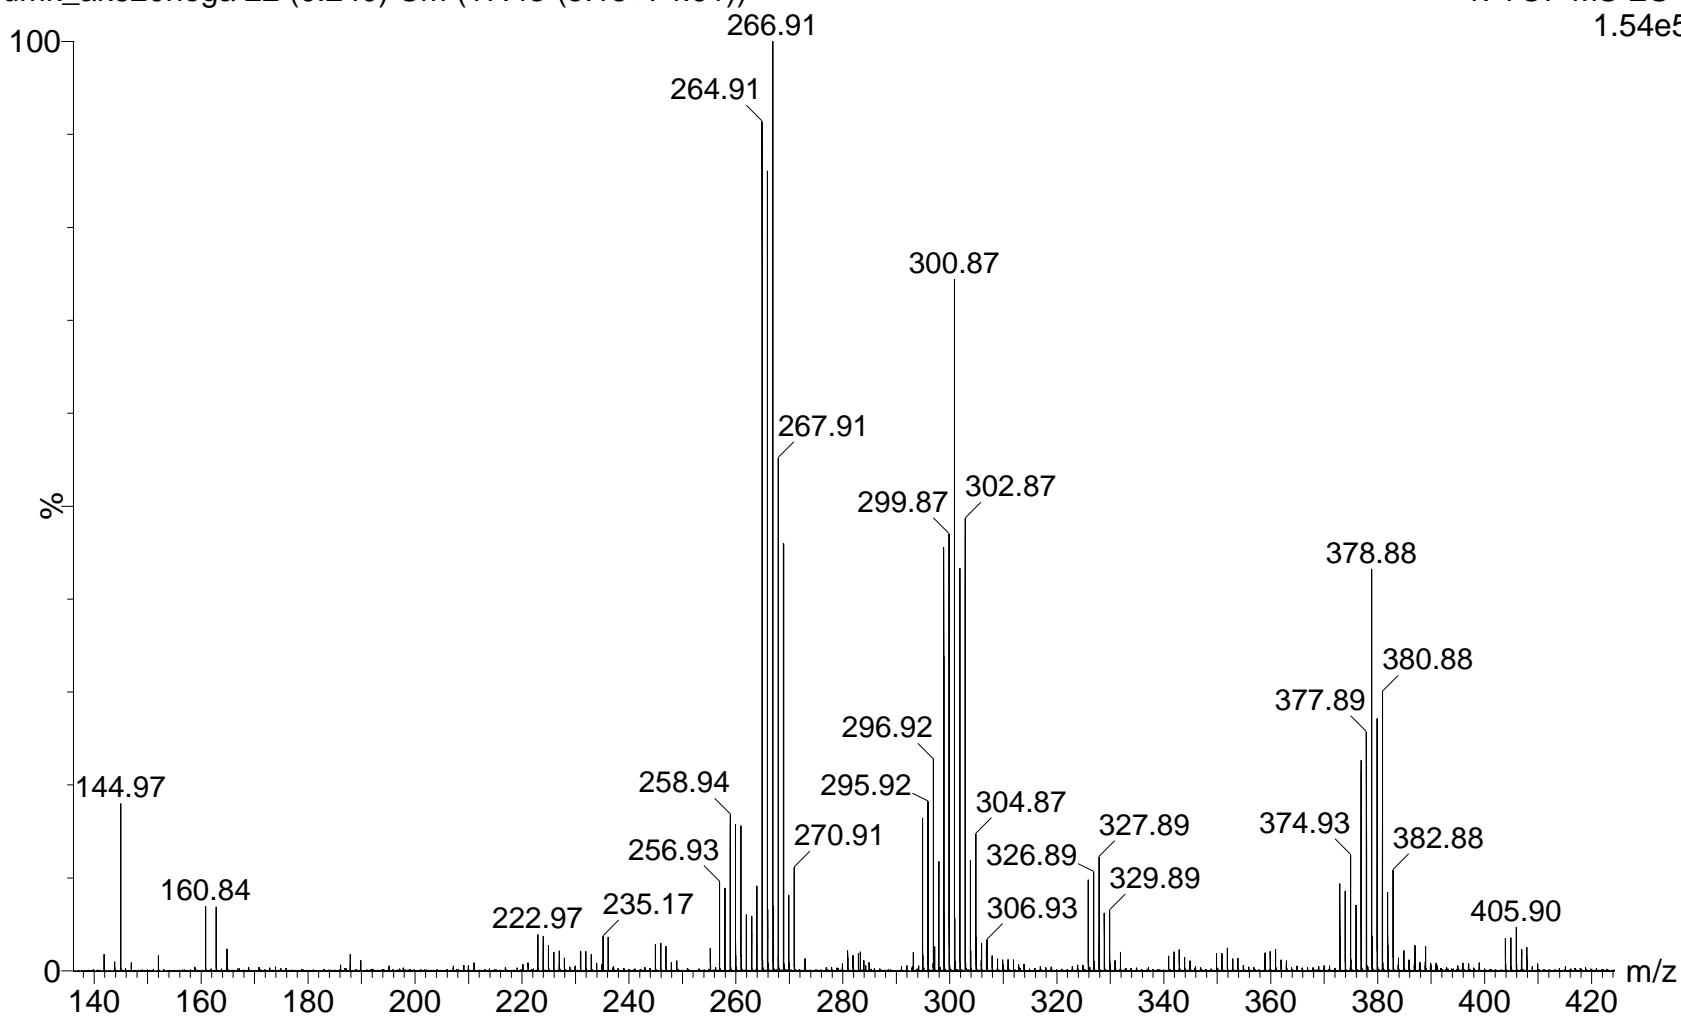

Figure S7h. Spectrum of *cis*-[PtCl<sub>2</sub>(DMSO)L] (2)



S5

umk\_ak620nega 22 (0.240) Cm (17:43-(5:15+74:91))

1: TOF MS ES-  
8.91e3

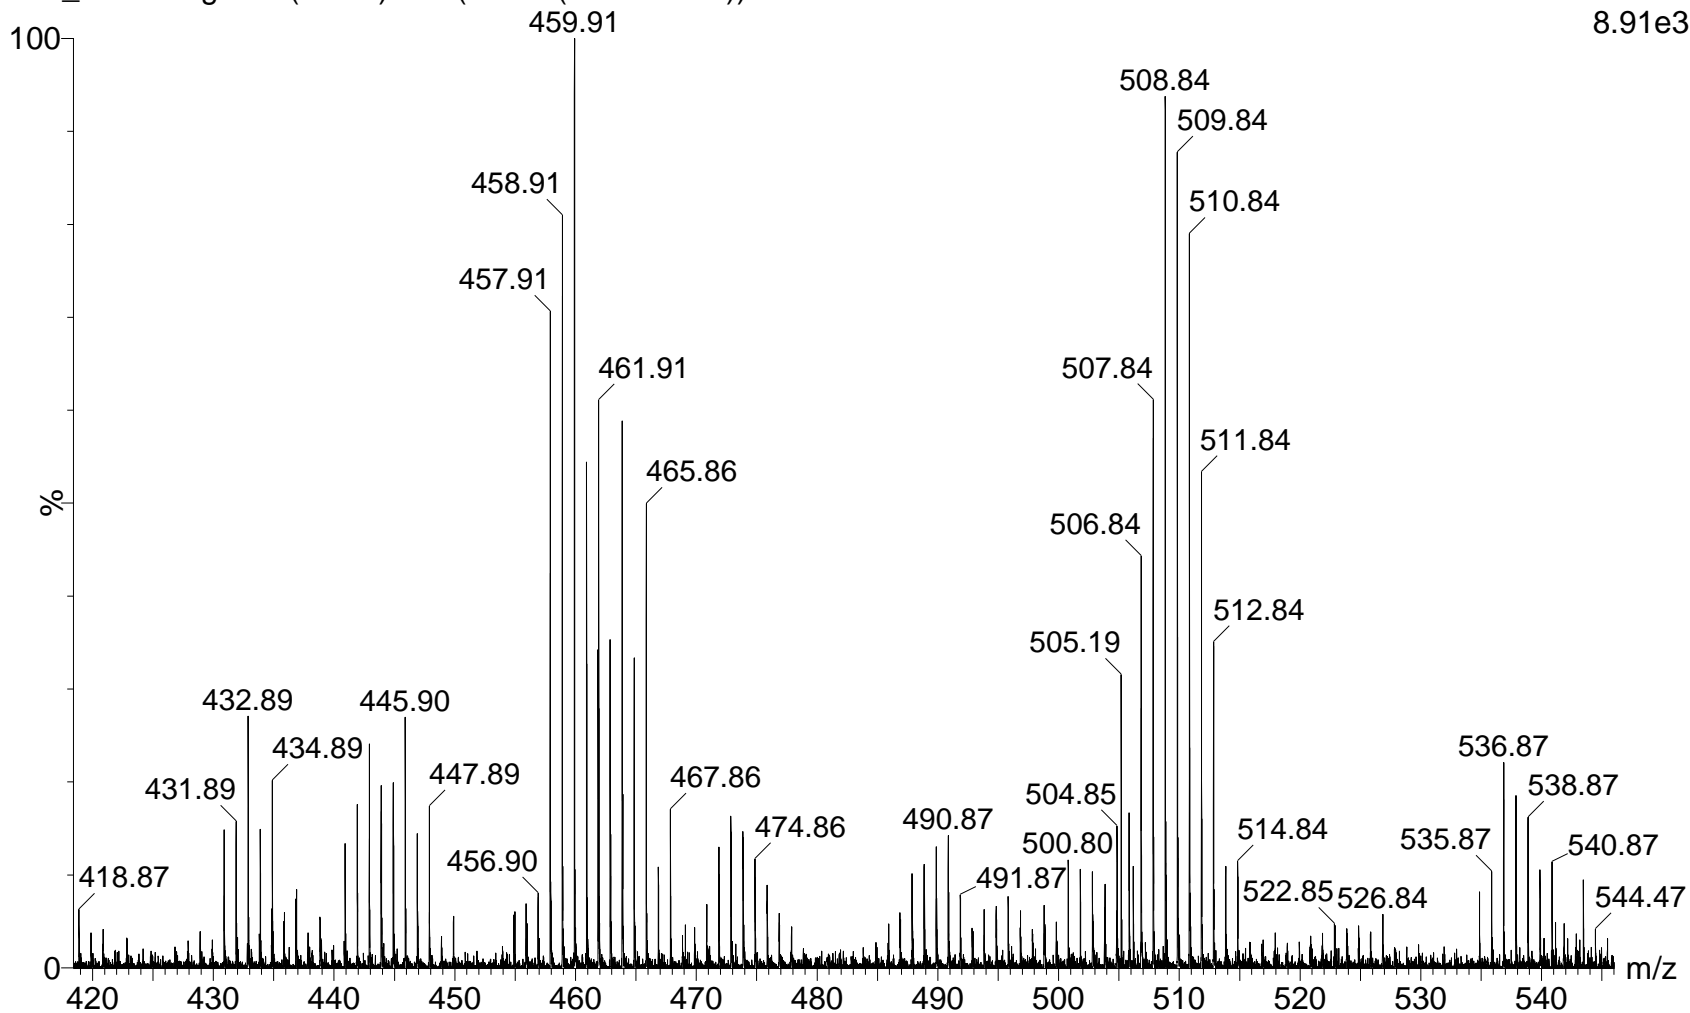

Figure S7i. Spectrum of *cis*-[PtCl<sub>2</sub>(DMSO)L] (2)

S5

umk\_ak620nega 22 (0.240) Cm (17:43-(5:15+74:91))

1: TOF MS ES-  
1.92e4

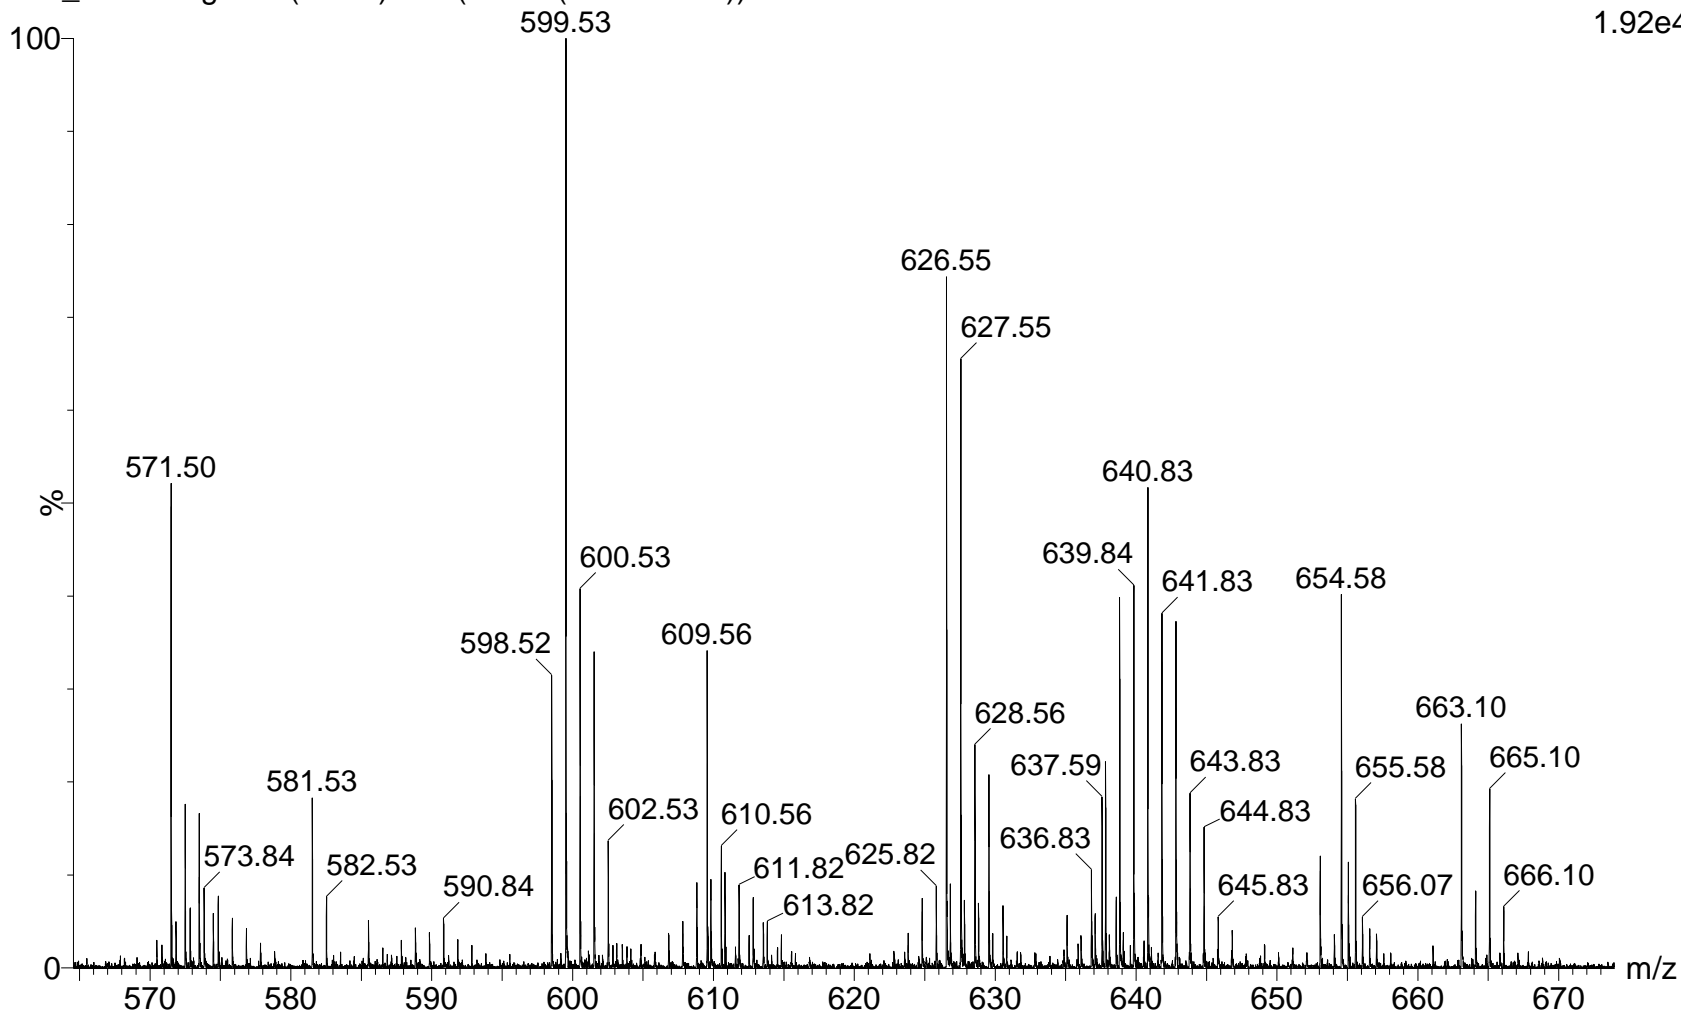

Figure S7j. Spectrum of *cis*-[PtCl<sub>2</sub>(DMSO)L] (**2**)

S5

umk\_ak620nega 22 (0.240) Cm (17:43-(5:15+74:91))

1: TOF MS ES-  
1.75e3

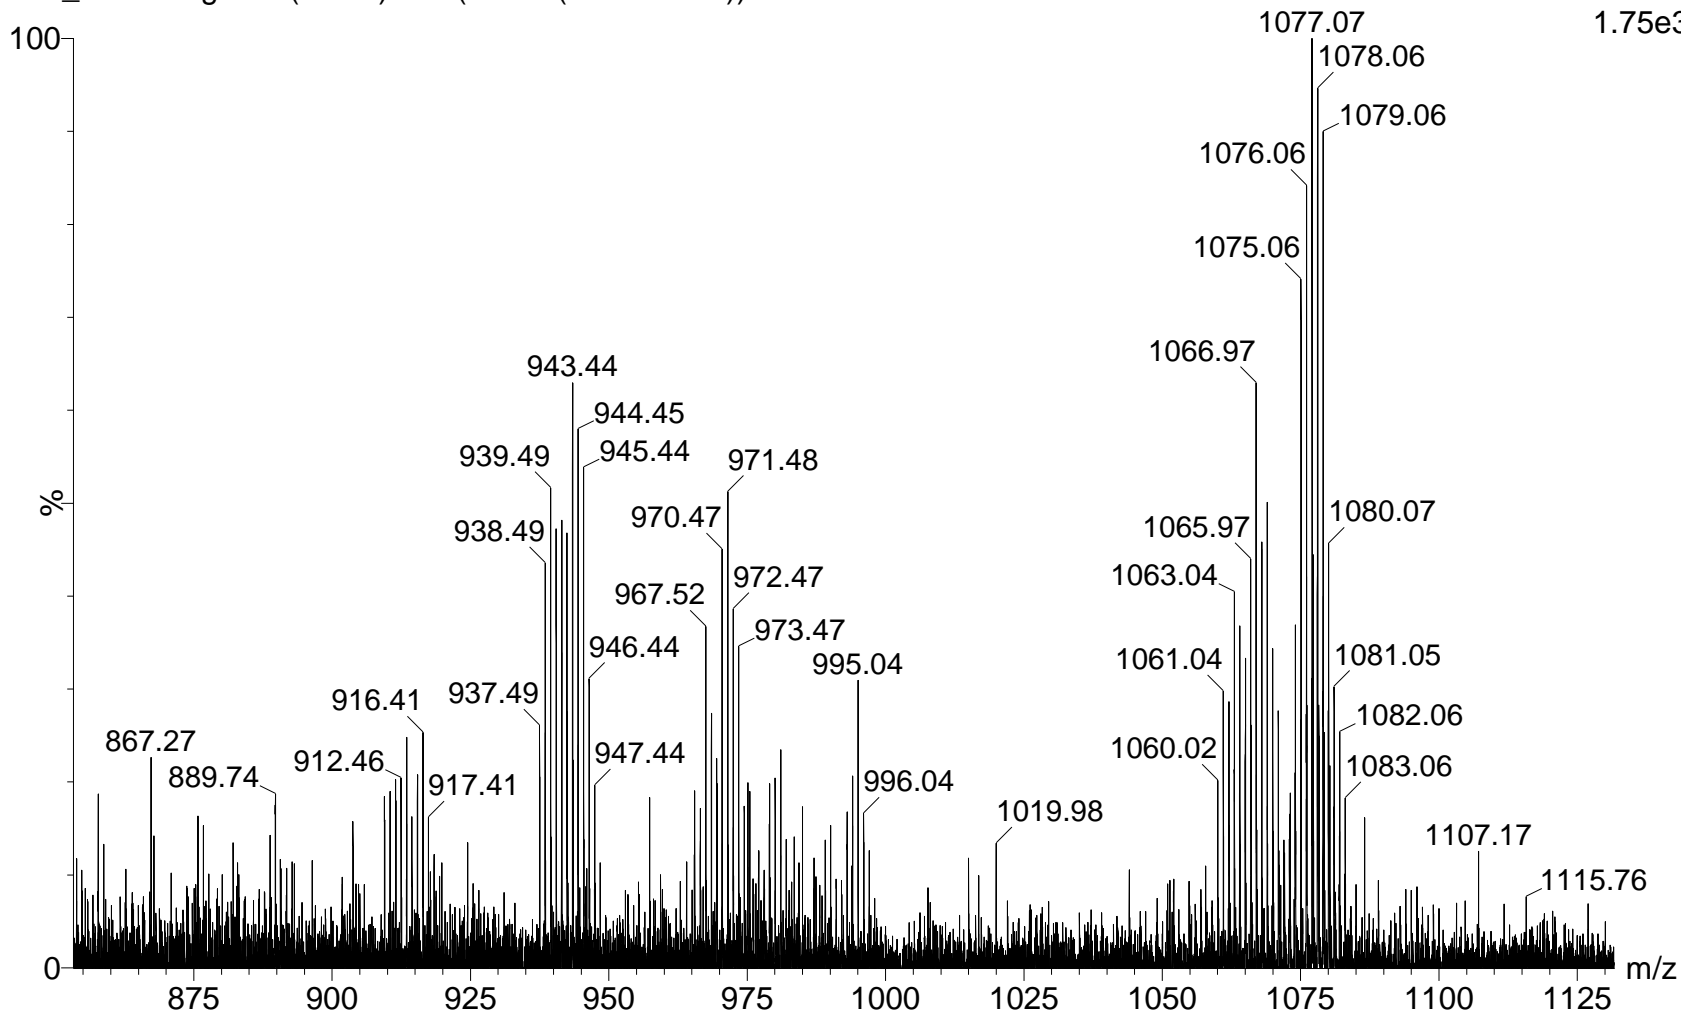

Figure S7k. Spectrum of *cis*-[PtCl<sub>2</sub>(DMSO)L] (2)

S5

umk\_ak620nega 22 (0.240) Cm (17:43-(5:15+74:91))

1: TOF MS ES-  
1.09e3

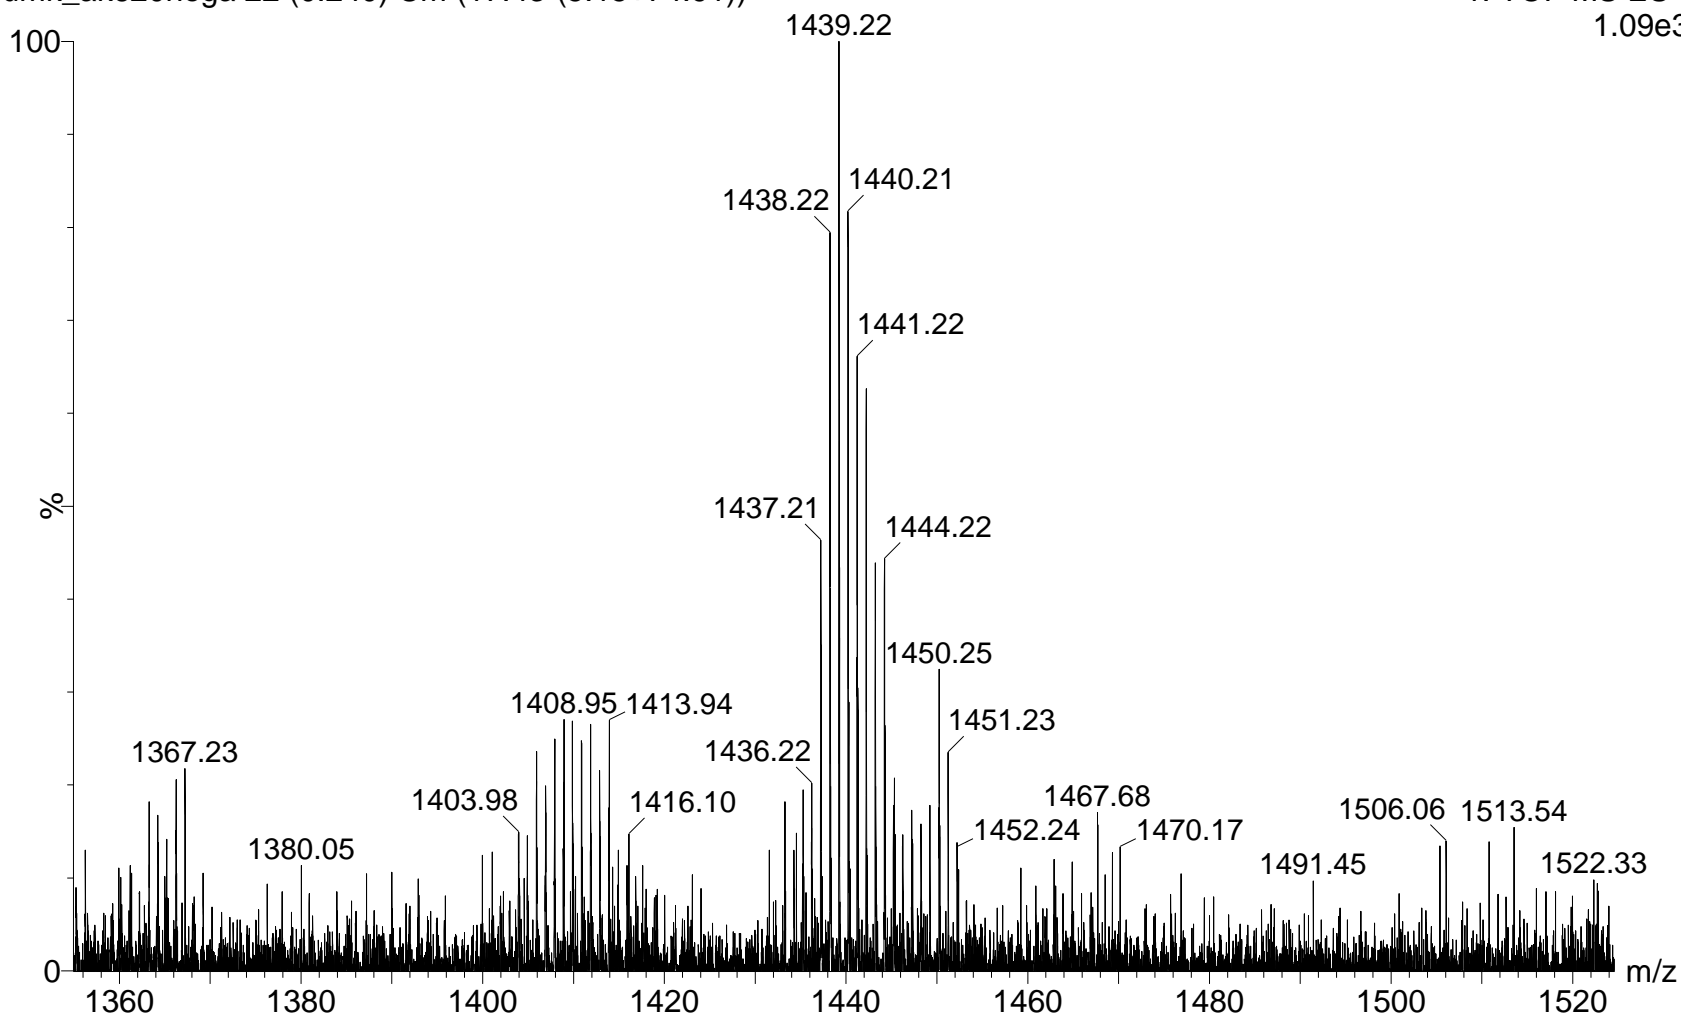

Figure S7I. Spectrum of *cis*-[PtCl<sub>2</sub>(DMSO)L] (2)
