# Supplementary material for: Unveiling the promising in vitro anticancer activity of lipophilic platinum(ii) complexes containing (1S,4R,5R)-4-(4-phenyl-1H-1,2,3-triazol-1-yl)-2-((S)-1-phenylethyl)-2-azabicyclo[3.2.1]octane: a spectroscopic characterization and DFT calculation
Source: Royal Society of Chemistry journal article supplement (doi:10.1039/d4dt03021d), 2025-01-01
Supplement: d4dt03021d13.pdf [file d4dt03021d13.pdf]

**Unveiling the promising anticancer activity of lipophilic platinum(II) complexes containing  
(1S, 4R, 5R)-4-(4-phenyl-1H-1,2,3-triazol-1-yl)-2-((S)-1-phenylethyl)-2-  
azabicyclo[3.2.1]octane: spectroscopical characterization and DFT calculation**

Adriana Kaszuba<sup>1</sup>, Jerzy Sitkowski<sup>2,3</sup>, Tadeusz Muzioł<sup>1</sup>, Elżbieta Wojaczyńska<sup>4</sup>, Franz Steppeler<sup>4</sup>, Karolina Pokrzywka<sup>5</sup>, Łukasz Kaźmierski<sup>5</sup>, Małgorzata Maj<sup>5</sup>, Marcin Hoffmann<sup>6</sup>, Iwona Łakomska<sup>1\*</sup>

<sup>1</sup>*Faculty of Chemistry, Nicolaus Copernicus University in Toruń, Gagarina 7, 87-100 Toruń, Poland; iwona.lakomska@umk.pl (I.L.); akaszuba@doktorant.umk.pl (A.K.);*

<sup>2</sup>*National Institutes of Medicines, Chelmska 30/34, 00-725 Warszawa, Poland j.sitkowski@nil.gov.pl*

<sup>3</sup>*Institutes of Organic Chemistry, Polish Academic of Science, Kasprzaka 44/52, 01-224 Warszawa, Poland elzbieta.wojaczynska@pwr.edu.pl (E.W.), franz.steppeler@pwr.edu.pl (F.S)*

<sup>4</sup>*Faculty of Chemistry, Wrocław University of Science and Technology, Wybrzeże Wyspiańskiego 27, 50 370 Wrocław, Poland*

<sup>5</sup>*Faculty of Medicine, Tissue Engineering Department, Collegium Medicum, Nicolaus Copernicus University, Karłowicza 24, 85-092 Bydgoszcz, Poland, m.maj@cm.umk.pl (M.M.); lukasz.kazmierski@cm.umk.pl (Ł.K.); karolinakowalska@doktorant.umk.pl (K.P.)*

<sup>6</sup>*Faculty of Chemistry, Adam Mickiewicz University in Poznań, Uniwersytetu Poznańskiego 8, 61-614 Poznań Poland mmh@amu.edu.pl*

\* *Correspondence: iwona.lakomska@umk.pl; tel.: +48-56-611-4510*

Video S1. Real-time cell growth of 5637 cell line during 72h incubation with tested compounds

Video S2. Real-time cell growth of T24 cell line during 72h incubation with tested compounds

Video S3. Real-time cell growth of HT1376 cell line during 72h incubation with tested compounds

Video S4. Real-time cell growth of SV-HUC cell line during 72h incubation with tested compounds

Figure S1. NMR spectra of ligand (L) in CDCl<sub>3</sub>

Figure S2. NMR spectra of ligand (L) in DMF-D<sub>7</sub>

Figure S3. NMR spectra of *trans*-[PtCl<sub>2</sub>L<sub>2</sub>] (1)

Figure S4. NMR spectra of *cis*-[PtCl<sub>2</sub>(DMSO)L] (2)

Figure S5. NMR spectra of [Pt(DMSO)L(mal)] (3)

Figure S6. MS spectra of *trans*-[PtCl<sub>2</sub>L<sub>2</sub>] (1)

Figure S7. MS spectra of *cis*-[PtCl<sub>2</sub>(DMSO)L] (2)

Figure S8. MS spectra of *cis*-[Pt(DMSO)L(mal)] (3)

Figure S9. IR spectrum of ligand (L)

Figure S10. IR spectrum of *trans*-[PtCl<sub>2</sub>L<sub>2</sub>] (1)

Figure S11. IR spectrum of *cis*-[PtCl<sub>2</sub>(DMSO)L] (2)

Figure S12. IR spectrum of [Pt(DMSO)L(mal)] (3)

Table 1. Relative energies [kcal/mol] Cartesian coordinates [Å], and Mulliken point charges [*e*] in vacuo and aqueous solution for the studied systems:

(2) *cis* N3' 0.0 0.5

| Atom | X         | Y         | Z         | in vacuo  | aqua      |
|------|-----------|-----------|-----------|-----------|-----------|
| Pt   | 1.459560  | -0.706384 | -0.630014 | -0.081692 | -0.009143 |
| N    | 0.403358  | 0.899834  | -0.068206 | -0.457956 | -0.464661 |
| N    | -0.888084 | 0.762867  | 0.209782  | 0.089847  | 0.065283  |
| N    | -1.277392 | 1.957181  | 0.699588  | -0.126511 | -0.128056 |
| C    | -0.237080 | 2.846451  | 0.735010  | -0.323963 | -0.299882 |
| H    | -0.335048 | 3.855895  | 1.090833  | 0.296950  | 0.330356  |
| C    | 0.860419  | 2.161710  | 0.241557  | 0.253847  | 0.234612  |
| C    | 2.274703  | 2.545145  | 0.108996  | 0.301631  | 0.310834  |
| C    | 2.957976  | 2.337556  | -1.104272 | -0.318193 | -0.328840 |
| H    | 2.430363  | 1.935134  | -1.963668 | 0.285723  | 0.269912  |
| C    | 2.960885  | 3.054091  | 1.225811  | -0.359208 | -0.368806 |
| H    | 2.440550  | 3.156436  | 2.171749  | 0.259390  | 0.268746  |
| C    | 4.322061  | 2.642655  | -1.195255 | -0.240841 | -0.256884 |
| H    | 4.846152  | 2.473392  | -2.129019 | 0.238572  | 0.253882  |
| C    | 4.322898  | 3.369053  | 1.125739  | -0.248232 | -0.258185 |
| H    | 4.851164  | 3.758634  | 1.989326  | 0.231109  | 0.254635  |
| C    | 5.005698  | 3.161238  | -0.083589 | -0.237466 | -0.249309 |
| H    | 6.061874  | 3.398053  | -0.158194 | 0.233554  | 0.256669  |
| C    | -2.680734 | 2.165792  | 1.119465  | -0.099850 | -0.104661 |
| H    | -2.633593 | 2.605919  | 2.121540  | 0.254400  | 0.288014  |
| C    | -3.428650 | 0.823232  | 1.218514  | -0.407986 | -0.407809 |
| H    | -4.263680 | 0.977605  | 1.930795  | 0.193737  | 0.219261  |
| H    | -2.772209 | 0.068066  | 1.658266  | 0.267273  | 0.249345  |

|    |           |           |           |           |           |
|----|-----------|-----------|-----------|-----------|-----------|
| C  | -3.394831 | 3.139997  | 0.150982  | -0.149204 | -0.155710 |
| H  | -2.851474 | 4.089478  | 0.112114  | 0.247856  | 0.272251  |
| C  | -4.874129 | 3.334338  | 0.591203  | -0.443292 | -0.449472 |
| H  | -4.984130 | 3.319958  | 1.681752  | 0.196286  | 0.208336  |
| H  | -5.231130 | 4.308514  | 0.244060  | 0.225813  | 0.232804  |
| C  | -3.537877 | 2.455240  | -1.221000 | -0.472203 | -0.474816 |
| H  | -3.935451 | 3.161872  | -1.957693 | 0.206979  | 0.219101  |
| H  | -2.613766 | 2.021306  | -1.609589 | 0.260840  | 0.234869  |
| C  | -5.662499 | 2.174781  | -0.100405 | -0.445875 | -0.449737 |
| H  | -6.187400 | 1.537711  | 0.619512  | 0.208095  | 0.213504  |
| H  | -6.412145 | 2.572778  | -0.791399 | 0.224518  | 0.229670  |
| C  | -4.579062 | 1.369946  | -0.885237 | -0.117545 | -0.125060 |
| H  | -4.978779 | 0.910677  | -1.786768 | 0.257062  | 0.259830  |
| N  | -3.908943 | 0.337269  | -0.076212 | -0.180471 | -0.193850 |
| C  | -4.482902 | -1.018334 | 0.034009  | -0.148556 | -0.146922 |
| H  | -5.214643 | -1.056078 | 0.868152  | 0.177292  | 0.198919  |
| C  | -3.371486 | -2.024130 | 0.346684  | 0.433477  | 0.419360  |
| C  | -5.220892 | -1.463893 | -1.241286 | -0.723035 | -0.731164 |
| H  | -4.566127 | -1.382348 | -2.115237 | 0.227475  | 0.216662  |
| H  | -5.508511 | -2.513698 | -1.134291 | 0.232994  | 0.229987  |
| H  | -6.131069 | -0.880943 | -1.417638 | 0.200685  | 0.220256  |
| C  | -3.508817 | -2.940280 | 1.401375  | -0.448822 | -0.457110 |
| H  | -4.391790 | -2.901921 | 2.035608  | 0.226331  | 0.252507  |
| C  | -2.221145 | -2.076644 | -0.461313 | -0.337674 | -0.348843 |
| H  | -2.087284 | -1.346098 | -1.251669 | 0.284918  | 0.269904  |
| C  | -2.518457 | -3.907561 | 1.642578  | -0.237932 | -0.260875 |
| H  | -2.638128 | -4.613159 | 2.459070  | 0.217767  | 0.243736  |
| C  | -1.237856 | -3.047785 | -0.234349 | -0.210244 | -0.215744 |
| H  | -0.367196 | -3.091191 | -0.881293 | 0.278384  | 0.255218  |
| C  | -1.384118 | -3.966802 | 0.819336  | -0.299258 | -0.307531 |
| H  | -0.627090 | -4.728098 | 0.983356  | 0.233593  | 0.252921  |
| S  | 2.245461  | -0.903667 | 1.614197  | 0.688192  | 0.696468  |
| C  | 4.104028  | -0.829854 | 1.636626  | -0.717727 | -0.704226 |
| H  | 4.429318  | -1.004722 | 2.662195  | 0.269051  | 0.301277  |
| H  | 4.470751  | -1.576732 | 0.932954  | 0.292075  | 0.290544  |
| H  | 4.356029  | 0.178434  | 1.307172  | 0.300478  | 0.299175  |
| C  | 1.859903  | -2.592580 | 2.292020  | -0.722906 | -0.709908 |
| H  | 2.293908  | -3.325031 | 1.611868  | 0.285497  | 0.287956  |
| H  | 2.267895  | -2.639549 | 3.301673  | 0.272761  | 0.304311  |
| H  | 0.772327  | -2.664368 | 2.293795  | 0.310937  | 0.304806  |
| O  | 1.700423  | 0.208789  | 2.735304  | -0.648165 | -0.693937 |
| Cl | 0.646330  | -0.431964 | -2.840878 | -0.208799 | -0.299136 |
| Cl | 2.757382  | -2.668029 | -1.146280 | -0.251782 | -0.315643 |

(2) cis N3' 0.3 0.0

| Atom | X         | Y         | Z         | in vacuo  | aqua      |
|------|-----------|-----------|-----------|-----------|-----------|
| Pt   | 2.781193  | -0.405980 | -0.494725 | -0.059072 | 0.005014  |
| N    | 0.810564  | -0.276409 | -0.863663 | -0.443795 | -0.446584 |
| N    | 0.093043  | -1.344535 | -1.212677 | 0.023687  | -0.008522 |
| N    | -1.197706 | -0.946404 | -1.126501 | -0.133622 | -0.125984 |
| C    | -1.298572 | 0.354858  | -0.729364 | -0.246552 | -0.233526 |
| H    | -2.234251 | 0.857216  | -0.568577 | 0.334334  | 0.344504  |
| C    | -0.000142 | 0.795571  | -0.560143 | 0.229117  | 0.222193  |
| C    | 0.498562  | 2.082467  | -0.053566 | 0.316066  | 0.321916  |
| C    | 1.556158  | 2.754973  | -0.693764 | -0.320561 | -0.331744 |
| H    | 1.998179  | 2.340564  | -1.594702 | 0.288961  | 0.271247  |
| C    | -0.073092 | 2.621479  | 1.113706  | -0.367419 | -0.375803 |
| H    | -0.853158 | 2.069893  | 1.627705  | 0.258158  | 0.270410  |
| C    | 2.039320  | 3.957619  | -0.161391 | -0.245548 | -0.260108 |
| H    | 2.860278  | 4.466916  | -0.653136 | 0.240006  | 0.255285  |
| C    | 0.404176  | 3.831707  | 1.634202  | -0.257166 | -0.262641 |
| H    | -0.035201 | 4.242012  | 2.537295  | 0.231948  | 0.257050  |
| C    | 1.464218  | 4.499758  | 0.999394  | -0.238663 | -0.248966 |
| H    | 1.839856  | 5.432638  | 1.406454  | 0.233863  | 0.257916  |
| C    | -2.261207 | -1.951426 | -1.339618 | -0.102129 | -0.111006 |
| H    | -2.165754 | -2.301325 | -2.371714 | 0.272987  | 0.295547  |
| C    | -3.645771 | -1.314112 | -1.153511 | -0.459082 | -0.467161 |
| H    | -4.377588 | -1.984669 | -1.640702 | 0.218504  | 0.242948  |
| H    | -3.707896 | -0.364384 | -1.695233 | 0.258485  | 0.262368  |
| C    | -2.056079 | -3.129905 | -0.354055 | -0.157850 | -0.150187 |
| H    | -1.087742 | -3.593307 | -0.547628 | 0.293717  | 0.282021  |
| C    | -3.234297 | -4.137032 | -0.462976 | -0.457773 | -0.463098 |
| H    | -3.602895 | -4.236605 | -1.490401 | 0.196691  | 0.209594  |
| H    | -2.891643 | -5.127254 | -0.149307 | 0.230508  | 0.234472  |
| C    | -2.208515 | -2.588733 | 1.079479  | -0.499654 | -0.509070 |
| H    | -1.967845 | -3.373477 | 1.805010  | 0.206344  | 0.219449  |
| H    | -1.588200 | -1.718959 | 1.308298  | 0.292981  | 0.263791  |
| C    | -4.329677 | -3.594361 | 0.513771  | -0.450882 | -0.454291 |
| H    | -5.284671 | -3.403539 | 0.011030  | 0.204926  | 0.216312  |
| H    | -4.524976 | -4.312270 | 1.316397  | 0.227314  | 0.233383  |
| C    | -3.717823 | -2.287348 | 1.105180  | -0.120027 | -0.124416 |
| H    | -4.065915 | -2.084402 | 2.115929  | 0.253220  | 0.263777  |
| N    | -3.975382 | -1.091462 | 0.264661  | -0.193967 | -0.205442 |
| C    | -5.281658 | -0.400056 | 0.393482  | -0.152239 | -0.153331 |
| H    | -6.029583 | -0.876856 | -0.271353 | 0.187526  | 0.208982  |
| C    | -5.113491 | 1.051432  | -0.056373 | 0.466654  | 0.457031  |
| C    | -5.854915 | -0.436930 | 1.820891  | -0.721220 | -0.729332 |
| H    | -5.131348 | -0.051296 | 2.546773  | 0.216182  | 0.216246  |
| H    | -6.744359 | 0.198549  | 1.861682  | 0.232793  | 0.232289  |
| H    | -6.148745 | -1.448432 | 2.117396  | 0.214149  | 0.225068  |
| C    | -5.909429 | 1.598794  | -1.072970 | -0.451380 | -0.458915 |
| H    | -6.656795 | 0.979420  | -1.562415 | 0.234992  | 0.256883  |
| C    | -4.148163 | 1.865263  | 0.566131  | -0.416917 | -0.429581 |
| H    | -3.527453 | 1.437390  | 1.348496  | 0.272176  | 0.281795  |
| C    | -5.743019 | 2.936799  | -1.469191 | -0.219996 | -0.244334 |

|    |           |           |           |           |           |
|----|-----------|-----------|-----------|-----------|-----------|
| H  | -6.361702 | 3.347321  | -2.260410 | 0.225707  | 0.246227  |
| C  | -3.974457 | 3.197379  | 0.171849  | -0.212782 | -0.237075 |
| H  | -3.216802 | 3.809781  | 0.650571  | 0.230930  | 0.246837  |
| C  | -4.773296 | 3.737895  | -0.850595 | -0.250003 | -0.273987 |
| H  | -4.637320 | 4.768289  | -1.161213 | 0.232063  | 0.250891  |
| S  | 2.262033  | -0.536790 | 1.843411  | 0.685045  | 0.692455  |
| C  | 3.015235  | 0.931820  | 2.702541  | -0.718875 | -0.705949 |
| H  | 2.822684  | 0.824783  | 3.770118  | 0.266954  | 0.300739  |
| H  | 4.076176  | 0.944639  | 2.453282  | 0.291644  | 0.289681  |
| H  | 2.505641  | 1.804468  | 2.293495  | 0.302426  | 0.298216  |
| C  | 3.107569  | -1.978566 | 2.661446  | -0.709725 | -0.699777 |
| H  | 4.166707  | -1.919908 | 2.412417  | 0.293061  | 0.288184  |
| H  | 2.906712  | -1.910446 | 3.730578  | 0.268098  | 0.300008  |
| H  | 2.653654  | -2.868589 | 2.229008  | 0.288355  | 0.299704  |
| O  | 0.653366  | -0.597725 | 2.300305  | -0.656257 | -0.690050 |
| Cl | 3.241793  | -0.151165 | -2.798716 | -0.199571 | -0.298363 |
| Cl | 5.097974  | -0.536815 | 0.143204  | -0.257846 | -0.321195 |

(2) trans N3' 1.9 1.9

| Atom | X         | Y         | Z         | in vacuo  | aqua      |
|------|-----------|-----------|-----------|-----------|-----------|
| Pt   | -1.590722 | -0.404685 | -0.091054 | -0.039781 | 0.020345  |
| N    | -0.228022 | 1.027188  | -0.338670 | -0.451109 | -0.451152 |
| N    | 1.002683  | 0.643782  | -0.664592 | 0.092055  | 0.054783  |
| N    | 1.706942  | 1.782184  | -0.820793 | -0.133548 | -0.132723 |
| C    | 0.923439  | 2.883067  | -0.603505 | -0.307165 | -0.274348 |
| H    | 1.287481  | 3.892363  | -0.654765 | 0.298959  | 0.329100  |
| C    | -0.336601 | 2.399832  | -0.285562 | 0.204582  | 0.192605  |
| C    | -1.570609 | 3.133791  | 0.039885  | 0.352585  | 0.335614  |
| C    | -2.325857 | 2.798455  | 1.178921  | -0.320001 | -0.329593 |
| H    | -1.994698 | 1.995843  | 1.830940  | 0.278894  | 0.269603  |
| C    | -1.989301 | 4.186494  | -0.792507 | -0.360361 | -0.372936 |
| H    | -1.421620 | 4.424505  | -1.686878 | 0.233725  | 0.261082  |
| C    | -3.494025 | 3.512447  | 1.473504  | -0.252246 | -0.265967 |
| H    | -4.070679 | 3.253653  | 2.355029  | 0.229427  | 0.252445  |
| C    | -3.156112 | 4.900644  | -0.491092 | -0.229850 | -0.250369 |
| H    | -3.479713 | 5.705871  | -1.141706 | 0.226649  | 0.253201  |
| C    | -3.911864 | 4.563440  | 0.642109  | -0.227068 | -0.245827 |
| H    | -4.817644 | 5.113835  | 0.873986  | 0.229415  | 0.255578  |
| C    | 3.144949  | 1.717889  | -1.185095 | -0.087862 | -0.090993 |
| H    | 3.216143  | 2.019674  | -2.236005 | 0.266176  | 0.297442  |
| C    | 3.668192  | 0.276706  | -1.055762 | -0.413139 | -0.409037 |
| H    | 4.579734  | 0.211242  | -1.681252 | 0.194094  | 0.221189  |
| H    | 2.944988  | -0.423161 | -1.476501 | 0.296250  | 0.266466  |
| C    | 3.962874  | 2.688230  | -0.298967 | -0.161264 | -0.171048 |
| H    | 3.617189  | 3.717312  | -0.438031 | 0.239507  | 0.270891  |

|    |           |           |           |           |           |
|----|-----------|-----------|-----------|-----------|-----------|
| C  | 5.478789  | 2.554949  | -0.624319 | -0.451405 | -0.457799 |
| H  | 5.655481  | 2.359878  | -1.688087 | 0.199607  | 0.209374  |
| H  | 5.984748  | 3.493791  | -0.380122 | 0.225689  | 0.235092  |
| C  | 3.889378  | 2.199238  | 1.160205  | -0.466542 | -0.473503 |
| H  | 4.364069  | 2.925055  | 1.829600  | 0.205220  | 0.220599  |
| H  | 2.877762  | 1.995289  | 1.518897  | 0.252874  | 0.236444  |
| C  | 5.992537  | 1.393093  | 0.286743  | -0.448036 | -0.451648 |
| H  | 6.441602  | 0.576956  | -0.289112 | 0.211346  | 0.214376  |
| H  | 6.752302  | 1.754599  | 0.986627  | 0.224258  | 0.231629  |
| C  | 4.728884  | 0.911248  | 1.065445  | -0.116585 | -0.123994 |
| H  | 4.974171  | 0.523581  | 2.051919  | 0.255318  | 0.259243  |
| N  | 3.933627  | -0.097525 | 0.337864  | -0.181521 | -0.198025 |
| C  | 4.320559  | -1.524447 | 0.442225  | -0.144997 | -0.142533 |
| H  | 5.167315  | -1.737829 | -0.243289 | 0.177744  | 0.200517  |
| C  | 3.146065  | -2.405083 | 0.015370  | 0.439535  | 0.426292  |
| C  | 4.766778  | -1.914424 | 1.862962  | -0.726157 | -0.731273 |
| H  | 4.007712  | -1.623928 | 2.596955  | 0.224755  | 0.216110  |
| H  | 4.882488  | -3.000846 | 1.910347  | 0.235588  | 0.229307  |
| H  | 5.725456  | -1.462188 | 2.139029  | 0.195096  | 0.219000  |
| C  | 3.308164  | -3.383311 | -0.977800 | -0.454003 | -0.460340 |
| H  | 4.270596  | -3.492677 | -1.473544 | 0.220958  | 0.251763  |
| C  | 1.895540  | -2.268380 | 0.644657  | -0.356421 | -0.367975 |
| H  | 1.747664  | -1.490519 | 1.387011  | 0.269220  | 0.266095  |
| C  | 2.236522  | -4.216897 | -1.341318 | -0.230988 | -0.260306 |
| H  | 2.371285  | -4.963970 | -2.117623 | 0.212725  | 0.240959  |
| C  | 0.830643  | -3.107859 | 0.297335  | -0.205999 | -0.228906 |
| H  | -0.127081 | -3.018434 | 0.799657  | 0.268115  | 0.265359  |
| C  | 0.996107  | -4.081236 | -0.701794 | -0.269444 | -0.301274 |
| H  | 0.158187  | -4.716044 | -0.969274 | 0.244151  | 0.249699  |
| S  | -3.158586 | -2.180069 | 0.214609  | 0.706094  | 0.706389  |
| C  | -4.398455 | -2.301237 | -1.166587 | -0.729428 | -0.719864 |
| H  | -5.103408 | -3.081864 | -0.879909 | 0.268180  | 0.295922  |
| H  | -4.865530 | -1.328664 | -1.310634 | 0.273352  | 0.293931  |
| H  | -3.828946 | -2.575842 | -2.051679 | 0.316785  | 0.302973  |
| C  | -4.239075 | -1.816811 | 1.685212  | -0.723536 | -0.711721 |
| H  | -4.725629 | -0.853936 | 1.531504  | 0.256991  | 0.288780  |
| H  | -4.947973 | -2.640259 | 1.771430  | 0.274328  | 0.298617  |
| H  | -3.560357 | -1.776189 | 2.535794  | 0.316697  | 0.298317  |
| O  | -2.579005 | -3.727751 | 0.438584  | -0.620466 | -0.700555 |
| Cl | -1.070979 | -0.502546 | 2.270482  | -0.266590 | -0.314561 |
| Cl | -2.161319 | -0.179630 | -2.415113 | -0.241434 | -0.298862 |

(2) cis N2' 3.0 3.4

| Atom | X         | Y         | Z        | in vacuo  | aqua     |
|------|-----------|-----------|----------|-----------|----------|
| Pt   | -2.580225 | -0.179368 | 0.726461 | -0.051407 | 0.031585 |

|   |           |           |           |           |           |
|---|-----------|-----------|-----------|-----------|-----------|
| N | -0.507390 | 1.886869  | 0.233170  | -0.090596 | -0.098645 |
| N | -0.749225 | 0.584645  | 0.360531  | -0.325972 | -0.331714 |
| N | 0.399218  | -0.111589 | 0.158196  | -0.074267 | -0.072224 |
| C | 1.399816  | 0.760842  | -0.105289 | -0.227009 | -0.213469 |
| H | 2.396506  | 0.411516  | -0.311027 | 0.346287  | 0.354903  |
| C | 0.826744  | 2.032511  | -0.055473 | 0.034756  | 0.024546  |
| C | 1.452337  | 3.346438  | -0.254661 | 0.356225  | 0.342457  |
| C | 0.755914  | 4.519777  | 0.087788  | -0.350995 | -0.362846 |
| H | -0.240678 | 4.440027  | 0.508165  | 0.260506  | 0.268669  |
| C | 2.751477  | 3.444460  | -0.786126 | -0.328954 | -0.340971 |
| H | 3.294022  | 2.546402  | -1.066615 | 0.213749  | 0.240312  |
| C | 1.352431  | 5.772495  | -0.099418 | -0.234358 | -0.257668 |
| H | 0.810496  | 6.672504  | 0.170593  | 0.228207  | 0.252136  |
| C | 3.347263  | 4.697749  | -0.970182 | -0.241819 | -0.261507 |
| H | 4.348093  | 4.764338  | -1.383588 | 0.225875  | 0.253681  |
| C | 2.649583  | 5.866573  | -0.627985 | -0.235308 | -0.253104 |
| H | 3.110905  | 6.837807  | -0.771075 | 0.230043  | 0.254812  |
| C | 0.435036  | -1.592859 | 0.178208  | -0.109942 | -0.102692 |
| H | -0.184213 | -1.896113 | 1.027520  | 0.315308  | 0.300491  |
| C | 1.872969  | -2.072395 | 0.418936  | -0.464178 | -0.464049 |
| H | 1.808125  | -3.102756 | 0.810999  | 0.223818  | 0.241712  |
| H | 2.338841  | -1.475114 | 1.208961  | 0.269178  | 0.266884  |
| C | -0.137822 | -2.166128 | -1.140303 | -0.124085 | -0.131096 |
| H | -1.166488 | -1.828184 | -1.276699 | 0.294956  | 0.292051  |
| C | -0.014372 | -3.714617 | -1.129158 | -0.454786 | -0.457490 |
| H | -0.169748 | -4.133678 | -0.129272 | 0.209942  | 0.211902  |
| H | -0.784050 | -4.141399 | -1.778131 | 0.231411  | 0.235953  |
| C | 0.784755  | -1.766494 | -2.301140 | -0.481865 | -0.491951 |
| H | 0.342297  | -2.075671 | -3.253291 | 0.223262  | 0.226893  |
| H | 0.990404  | -0.696483 | -2.361817 | 0.249546  | 0.241038  |
| C | 1.414556  | -4.014286 | -1.692441 | -0.450917 | -0.454649 |
| H | 2.029094  | -4.592879 | -0.993480 | 0.204722  | 0.215691  |
| H | 1.354017  | -4.590410 | -2.621006 | 0.226394  | 0.234673  |
| C | 2.030428  | -2.610520 | -1.979040 | -0.116616 | -0.120209 |
| H | 2.731744  | -2.625113 | -2.811411 | 0.249927  | 0.264421  |
| N | 2.709838  | -2.013594 | -0.798090 | -0.213077 | -0.219853 |
| C | 4.089678  | -2.469564 | -0.487969 | -0.144808 | -0.147013 |
| H | 4.052416  | -3.417193 | 0.085210  | 0.190667  | 0.209341  |
| C | 4.763691  | -1.418988 | 0.394109  | 0.463393  | 0.448731  |
| C | 4.941383  | -2.729231 | -1.742493 | -0.725784 | -0.732861 |
| H | 4.935309  | -1.862443 | -2.411954 | 0.210836  | 0.215485  |
| H | 5.975694  | -2.913710 | -1.437953 | 0.233133  | 0.232172  |
| H | 4.593048  | -3.604905 | -2.298192 | 0.215371  | 0.225004  |
| C | 5.232873  | -1.737735 | 1.676598  | -0.436637 | -0.447923 |
| H | 5.112333  | -2.749169 | 2.055797  | 0.235534  | 0.256559  |
| C | 4.921535  | -0.102713 | -0.079287 | -0.399697 | -0.413353 |
| H | 4.568108  | 0.144773  | -1.077441 | 0.245786  | 0.266580  |
| C | 5.844304  | -0.760078 | 2.479271  | -0.221969 | -0.247792 |
| H | 6.196237  | -1.018977 | 3.472346  | 0.226959  | 0.246917  |
| C | 5.527716  | 0.876085  | 0.716717  | -0.216523 | -0.245847 |

|    |           |           |           |           |           |
|----|-----------|-----------|-----------|-----------|-----------|
| H  | 5.639094  | 1.889220  | 0.343042  | 0.222135  | 0.246472  |
| C  | 5.990160  | 0.549789  | 2.002972  | -0.248947 | -0.273467 |
| H  | 6.454602  | 1.308161  | 2.624073  | 0.231069  | 0.251082  |
| S  | -3.192310 | 0.580796  | -1.462403 | 0.681337  | 0.692242  |
| C  | -3.514638 | 2.412486  | -1.398331 | -0.723490 | -0.711238 |
| H  | -3.717101 | 2.743116  | -2.417020 | 0.275165  | 0.299669  |
| H  | -4.349747 | 2.590628  | -0.721554 | 0.268314  | 0.289078  |
| H  | -2.594486 | 2.846976  | -1.007511 | 0.317841  | 0.308712  |
| C  | -4.785201 | -0.109224 | -2.130054 | -0.720001 | -0.709824 |
| H  | -5.590942 | 0.145237  | -1.444694 | 0.286355  | 0.293912  |
| H  | -4.906146 | 0.313952  | -3.127381 | 0.270738  | 0.299277  |
| H  | -4.653198 | -1.188721 | -2.162537 | 0.300784  | 0.302174  |
| O  | -2.038196 | 0.346518  | -2.648716 | -0.639734 | -0.692882 |
| Cl | -1.832642 | -0.910407 | 2.852834  | -0.201035 | -0.291589 |
| Cl | -4.793668 | -0.991150 | 1.085580  | -0.214750 | -0.290292 |

(2) trans N3' 3.0 2.7

| Atom | X         | Y         | Z         | in vacuo  | aqua      |
|------|-----------|-----------|-----------|-----------|-----------|
| Pt   | -2.599816 | -0.333137 | 0.175957  | -0.025576 | 0.034239  |
| N    | -0.618551 | -0.273386 | 0.378471  | -0.438097 | -0.437321 |
| N    | 0.050966  | -1.357670 | 0.774341  | 0.023998  | -0.006097 |
| N    | 1.356308  | -1.012461 | 0.698088  | -0.135961 | -0.127173 |
| C    | 1.513872  | 0.270230  | 0.261874  | -0.252434 | -0.228006 |
| H    | 2.475000  | 0.730938  | 0.125849  | 0.343942  | 0.351232  |
| C    | 0.234949  | 0.761477  | 0.057665  | 0.193626  | 0.187843  |
| C    | -0.166181 | 2.089952  | -0.430671 | 0.365814  | 0.344696  |
| C    | -1.253852 | 2.782777  | 0.130675  | -0.307278 | -0.321897 |
| H    | -1.816811 | 2.348547  | 0.950640  | 0.279090  | 0.270149  |
| C    | 0.574086  | 2.679910  | -1.472031 | -0.355988 | -0.368026 |
| H    | 1.395385  | 2.132244  | -1.925638 | 0.225782  | 0.260094  |
| C    | -1.603916 | 4.046316  | -0.361241 | -0.246836 | -0.271559 |
| H    | -2.453388 | 4.566212  | 0.066801  | 0.237013  | 0.253843  |
| C    | 0.228443  | 3.948226  | -1.952465 | -0.241607 | -0.257125 |
| H    | 0.794578  | 4.391821  | -2.764771 | 0.224157  | 0.254710  |
| C    | -0.865657 | 4.632705  | -1.399950 | -0.228799 | -0.247824 |
| H    | -1.144075 | 5.609751  | -1.780526 | 0.228574  | 0.255736  |
| C    | 2.376858  | -2.031344 | 1.019079  | -0.101790 | -0.111109 |
| H    | 2.128907  | -2.411012 | 2.014338  | 0.273882  | 0.295622  |
| C    | 3.775248  | -1.397866 | 1.063307  | -0.459553 | -0.466500 |
| H    | 4.420248  | -2.075906 | 1.651950  | 0.217294  | 0.242283  |
| H    | 3.747108  | -0.454332 | 1.617924  | 0.265339  | 0.265522  |
| C    | 2.314889  | -3.182363 | -0.015131 | -0.156528 | -0.151232 |
| H    | 1.320217  | -3.630675 | 0.007321  | 0.295694  | 0.282115  |
| C    | 3.445593  | -4.211946 | 0.261225  | -0.452154 | -0.456782 |
| H    | 3.636618  | -4.339349 | 1.332833  | 0.197678  | 0.210391  |



|    |           |           |           |           |           |
|----|-----------|-----------|-----------|-----------|-----------|
| H  | 3.147646  | -5.189100 | -0.129324 | 0.232013  | 0.235513  |
| C  | 2.708859  | -2.619626 | -1.392410 | -0.479682 | -0.486749 |
| H  | 2.572071  | -3.382008 | -2.166478 | 0.218514  | 0.227386  |
| H  | 2.154304  | -1.726720 | -1.689058 | 0.250159  | 0.237117  |
| C  | 4.695019  | -3.665608 | -0.506086 | -0.451725 | -0.455009 |
| H  | 5.552849  | -3.495195 | 0.154043  | 0.206372  | 0.216885  |
| H  | 5.016970  | -4.371715 | -1.277628 | 0.228865  | 0.234609  |
| C  | 4.205716  | -2.340932 | -1.167750 | -0.119185 | -0.122651 |
| H  | 4.718148  | -2.129959 | -2.104267 | 0.254981  | 0.265552  |
| N  | 4.331403  | -1.157786 | -0.280617 | -0.199651 | -0.210609 |
| C  | 5.650766  | -0.483526 | -0.183477 | -0.150974 | -0.151309 |
| H  | 6.280819  | -0.994875 | 0.571558  | 0.188601  | 0.209637  |
| C  | 5.430351  | 0.953754  | 0.288374  | 0.465753  | 0.454547  |
| C  | 6.435124  | -0.485397 | -1.506940 | -0.721763 | -0.730462 |
| H  | 5.833454  | -0.072801 | -2.323661 | 0.214467  | 0.216106  |
| H  | 7.323421  | 0.142548  | -1.392966 | 0.234535  | 0.232467  |
| H  | 6.766588  | -1.490491 | -1.785039 | 0.213142  | 0.224872  |
| C  | 6.039788  | 1.440354  | 1.453903  | -0.446323 | -0.453835 |
| H  | 6.679576  | 0.784901  | 2.039379  | 0.234260  | 0.256905  |
| C  | 4.602579  | 1.814383  | -0.457085 | -0.418105 | -0.432451 |
| H  | 4.129854  | 1.439080  | -1.360752 | 0.264751  | 0.281029  |
| C  | 5.822625  | 2.763053  | 1.875778  | -0.220629 | -0.245497 |
| H  | 6.295819  | 3.125974  | 2.782228  | 0.226076  | 0.246614  |
| C  | 4.377583  | 3.131160  | -0.038406 | -0.211297 | -0.239056 |
| H  | 3.724486  | 3.779158  | -0.614114 | 0.232434  | 0.247150  |
| C  | 4.987861  | 3.609749  | 1.133658  | -0.247229 | -0.271975 |
| H  | 4.810188  | 4.627681  | 1.463406  | 0.233095  | 0.251024  |
| S  | -4.980248 | -0.327762 | -0.076903 | 0.700466  | 0.700200  |
| C  | -5.776668 | -1.216179 | 1.352235  | -0.724044 | -0.713175 |
| H  | -6.851098 | -1.211553 | 1.168520  | 0.270198  | 0.297258  |
| H  | -5.361560 | -2.221418 | 1.417309  | 0.257511  | 0.289402  |
| H  | -5.512702 | -0.635583 | 2.234552  | 0.317742  | 0.298835  |
| C  | -5.541961 | -1.347296 | -1.529161 | -0.730122 | -0.719088 |
| H  | -5.107549 | -2.342778 | -1.454780 | 0.266302  | 0.291457  |
| H  | -6.631836 | -1.349836 | -1.502461 | 0.267191  | 0.295736  |
| H  | -5.159902 | -0.837877 | -2.411105 | 0.315660  | 0.301390  |
| O  | -5.772937 | 1.130697  | -0.215511 | -0.619040 | -0.710137 |
| Cl | -2.867177 | 0.247526  | 2.501564  | -0.262208 | -0.316653 |
| Cl | -2.270762 | -0.963703 | -2.124387 | -0.260388 | -0.310861 |

(2) trans N2' 3.1 5.4

| Atom | X         | Y        | Z         | in vacuo  | aqua      |
|------|-----------|----------|-----------|-----------|-----------|
| Pt   | -2.436629 | 0.291488 | 0.212237  | -0.030743 | 0.046055  |
| N    | -0.141624 | 2.139414 | -0.151490 | -0.046389 | -0.088686 |
| N    | -0.548221 | 0.883374 | -0.039766 | -0.332543 | -0.327240 |

|   |           |           |           |           |           |
|---|-----------|-----------|-----------|-----------|-----------|
| N | 0.521194  | 0.041561  | -0.102032 | -0.083802 | -0.077532 |
| C | 1.643184  | 0.781702  | -0.266861 | -0.239377 | -0.220542 |
| H | 2.604910  | 0.310905  | -0.377776 | 0.345578  | 0.355765  |
| C | 1.225308  | 2.113856  | -0.293369 | 0.035493  | 0.028862  |
| C | 2.022035  | 3.338463  | -0.445656 | 0.350332  | 0.341823  |
| C | 1.391710  | 4.555882  | -0.760365 | -0.344873 | -0.364609 |
| H | 0.314742  | 4.576547  | -0.885269 | 0.269167  | 0.269386  |
| C | 3.418304  | 3.303116  | -0.276325 | -0.332667 | -0.335345 |
| H | 3.908754  | 2.372794  | -0.004429 | 0.221409  | 0.239205  |
| C | 2.153003  | 5.721237  | -0.910886 | -0.235485 | -0.257898 |
| H | 1.661218  | 6.656820  | -1.154657 | 0.227624  | 0.251717  |
| C | 4.177485  | 4.469111  | -0.431698 | -0.240914 | -0.261597 |
| H | 5.253654  | 4.435331  | -0.297137 | 0.221061  | 0.252564  |
| C | 3.547349  | 5.682171  | -0.750569 | -0.236327 | -0.253610 |
| H | 4.135042  | 6.586288  | -0.869100 | 0.228036  | 0.254399  |
| C | 0.370860  | -1.430154 | -0.016588 | -0.096824 | -0.090772 |
| H | -0.364701 | -1.609628 | 0.773088  | 0.315082  | 0.305096  |
| C | 1.701859  | -2.065621 | 0.408314  | -0.463966 | -0.464363 |
| H | 1.462379  | -3.051077 | 0.845972  | 0.222718  | 0.241891  |
| H | 2.157218  | -1.477986 | 1.211540  | 0.268236  | 0.266837  |
| C | -0.133153 | -2.011182 | -1.359515 | -0.146075 | -0.144975 |
| H | -1.093269 | -1.562839 | -1.621159 | 0.320420  | 0.296543  |
| C | -0.216350 | -3.558857 | -1.257504 | -0.448813 | -0.453139 |
| H | -0.532694 | -3.888698 | -0.262341 | 0.208785  | 0.212461  |
| H | -0.964286 | -3.925008 | -1.965506 | 0.239798  | 0.237353  |
| C | 0.954861  | -1.805994 | -2.425655 | -0.488541 | -0.496188 |
| H | 0.583552  | -2.117714 | -3.407386 | 0.223299  | 0.231160  |
| H | 1.318013  | -0.779153 | -2.509130 | 0.242504  | 0.241741  |
| C | 1.211656  | -4.072007 | -1.638014 | -0.452165 | -0.454975 |
| H | 1.666889  | -4.675929 | -0.844880 | 0.204484  | 0.216696  |
| H | 1.174662  | -4.696138 | -2.536268 | 0.227152  | 0.235202  |
| C | 2.035562  | -2.779545 | -1.924332 | -0.118211 | -0.122188 |
| H | 2.811437  | -2.935754 | -2.671534 | 0.252576  | 0.267560  |
| N | 2.662238  | -2.196529 | -0.707613 | -0.208305 | -0.215394 |
| C | 3.920391  | -2.818118 | -0.219214 | -0.143686 | -0.146752 |
| H | 3.683411  | -3.711333 | 0.392504  | 0.189270  | 0.208574  |
| C | 4.649173  | -1.820747 | 0.680514  | 0.469197  | 0.454209  |
| C | 4.852621  | -3.278915 | -1.353288 | -0.725872 | -0.732655 |
| H | 5.045616  | -2.466977 | -2.062459 | 0.212005  | 0.215694  |
| H | 5.810255  | -3.586465 | -0.923277 | 0.232951  | 0.232253  |
| H | 4.439709  | -4.132230 | -1.899426 | 0.215767  | 0.225166  |
| C | 4.927737  | -2.123178 | 2.021442  | -0.435434 | -0.446890 |
| H | 4.604000  | -3.075040 | 2.434416  | 0.235377  | 0.256474  |
| C | 5.069054  | -0.581150 | 0.161892  | -0.407330 | -0.417978 |
| H | 4.859132  | -0.342787 | -0.877722 | 0.255741  | 0.271458  |
| C | 5.612271  | -1.206376 | 2.836543  | -0.222573 | -0.248202 |
| H | 5.814781  | -1.451352 | 3.873851  | 0.226884  | 0.247146  |
| C | 5.757731  | 0.332988  | 0.968312  | -0.224305 | -0.250619 |
| H | 6.091528  | 1.279247  | 0.553090  | 0.220281  | 0.245887  |
| C | 6.029576  | 0.024177  | 2.311916  | -0.250572 | -0.276356 |

|    |           |           |           |           |           |
|----|-----------|-----------|-----------|-----------|-----------|
| H  | 6.558744  | 0.734026  | 2.938627  | 0.231177  | 0.251829  |
| S  | -4.682126 | -0.471627 | 0.511966  | 0.699001  | 0.701528  |
| C  | -5.869033 | 0.403790  | -0.623820 | -0.723563 | -0.714446 |
| H  | -6.867071 | 0.050590  | -0.364291 | 0.269453  | 0.297133  |
| H  | -5.750446 | 1.478993  | -0.497688 | 0.266833  | 0.293045  |
| H  | -5.581977 | 0.108535  | -1.630773 | 0.317668  | 0.302138  |
| C  | -5.334401 | -0.004789 | 2.191968  | -0.722105 | -0.712962 |
| H  | -5.227390 | 1.071040  | 2.324748  | 0.264648  | 0.292646  |
| H  | -6.371848 | -0.337127 | 2.229012  | 0.271090  | 0.297939  |
| H  | -4.710639 | -0.538718 | 2.906056  | 0.317596  | 0.301362  |
| O  | -4.980224 | -2.100239 | 0.331189  | -0.617991 | -0.705912 |
| Cl | -1.949824 | -0.162146 | 2.530522  | -0.256099 | -0.305374 |
| Cl | -2.864902 | 0.704431  | -2.117186 | -0.243146 | -0.299599 |

(2) cis N3' 3.5 3.0

| Atom | X         | Y         | Z         | in vacuo  | aqua      |
|------|-----------|-----------|-----------|-----------|-----------|
| Pt   | -1.699108 | -0.333617 | -1.100990 | -0.055068 | 0.011100  |
| N    | -0.482436 | -0.829706 | 0.417509  | -0.457094 | -0.458150 |
| N    | 0.813651  | -1.042575 | 0.201150  | 0.046594  | 0.015119  |
| N    | 1.327111  | -1.389289 | 1.402718  | -0.099798 | -0.103035 |
| C    | 0.361532  | -1.379219 | 2.375139  | -0.321713 | -0.290759 |
| H    | 0.556574  | -1.634712 | 3.400766  | 0.295151  | 0.327164  |
| C    | -0.814900 | -1.019112 | 1.741051  | 0.267781  | 0.248831  |
| C    | -2.184404 | -0.844974 | 2.254795  | 0.285422  | 0.294512  |
| C    | -3.246057 | -1.578537 | 1.690566  | -0.320886 | -0.326306 |
| H    | -3.050441 | -2.290318 | 0.894262  | 0.286563  | 0.270949  |
| C    | -2.436944 | 0.083630  | 3.278926  | -0.342515 | -0.355668 |
| H    | -1.623894 | 0.686032  | 3.667427  | 0.259540  | 0.267465  |
| C    | -4.553234 | -1.382722 | 2.155523  | -0.247872 | -0.259951 |
| H    | -5.367624 | -1.946470 | 1.714889  | 0.240636  | 0.255985  |
| C    | -3.744585 | 0.267637  | 3.748770  | -0.243131 | -0.255774 |
| H    | -3.937105 | 0.988380  | 4.535857  | 0.232677  | 0.255476  |
| C    | -4.804031 | -0.463730 | 3.187782  | -0.242244 | -0.251790 |
| H    | -5.816232 | -0.317347 | 3.549829  | 0.235372  | 0.258128  |
| C    | 2.761652  | -1.724804 | 1.560040  | -0.103180 | -0.107833 |
| H    | 2.872634  | -1.957708 | 2.624622  | 0.221430  | 0.264464  |
| C    | 3.659456  | -0.513145 | 1.243624  | -0.394762 | -0.402362 |
| H    | 4.609296  | -0.656640 | 1.794714  | 0.200642  | 0.225093  |
| H    | 3.200018  | 0.389895  | 1.650165  | 0.264829  | 0.259044  |
| C    | 3.173213  | -2.964398 | 0.727460  | -0.160760 | -0.166417 |
| H    | 2.538918  | -3.813862 | 0.995234  | 0.254381  | 0.266974  |
| C    | 4.686015  | -3.251874 | 0.967756  | -0.438881 | -0.444923 |
| H    | 4.992993  | -3.043276 | 1.999515  | 0.191195  | 0.207836  |
| H    | 4.881807  | -4.311783 | 0.781001  | 0.230372  | 0.234773  |
| C    | 3.151673  | -2.627348 | -0.776432 | -0.485706 | -0.487347 |

|    |           |           |           |           |           |
|----|-----------|-----------|-----------|-----------|-----------|
| H  | 3.394632  | -3.524495 | -1.357240 | 0.204342  | 0.212331  |
| H  | 2.211951  | -2.215260 | -1.136885 | 0.305345  | 0.266008  |
| C  | 5.440881  | -2.356645 | -0.070936 | -0.457583 | -0.462593 |
| H  | 6.136672  | -1.656511 | 0.404123  | 0.204458  | 0.213577  |
| H  | 6.023443  | -2.972776 | -0.762554 | 0.226835  | 0.231573  |
| C  | 4.306790  | -1.614800 | -0.848011 | -0.087041 | -0.093848 |
| H  | 4.584607  | -1.400856 | -1.877435 | 0.242821  | 0.247840  |
| N  | 3.874094  | -0.355335 | -0.196625 | -0.194645 | -0.208738 |
| C  | 4.591763  | 0.886929  | -0.550613 | -0.123744 | -0.125602 |
| H  | 5.612215  | 0.887758  | -0.113432 | 0.182332  | 0.203396  |
| C  | 3.856251  | 2.105954  | 0.007909  | 0.414671  | 0.406103  |
| C  | 4.730904  | 1.053984  | -2.078491 | -0.711029 | -0.717180 |
| H  | 3.757546  | 0.904984  | -2.557182 | 0.231468  | 0.215729  |
| H  | 5.073904  | 2.068604  | -2.300735 | 0.229150  | 0.230322  |
| H  | 5.454120  | 0.357099  | -2.512980 | 0.200091  | 0.217288  |
| C  | 4.589497  | 3.205969  | 0.480116  | -0.441224 | -0.450612 |
| H  | 5.676525  | 3.170956  | 0.470691  | 0.227652  | 0.252347  |
| C  | 2.450304  | 2.159924  | 0.031647  | -0.414265 | -0.420576 |
| H  | 1.887501  | 1.299886  | -0.321920 | 0.296428  | 0.292029  |
| C  | 3.933610  | 4.345909  | 0.970581  | -0.226934 | -0.251826 |
| H  | 4.512730  | 5.190547  | 1.330742  | 0.217906  | 0.242650  |
| C  | 1.790620  | 3.281826  | 0.552823  | -0.226287 | -0.251450 |
| H  | 0.707598  | 3.270527  | 0.640869  | 0.274809  | 0.278164  |
| C  | 2.532232  | 4.381767  | 1.015459  | -0.272969 | -0.293696 |
| H  | 2.021561  | 5.249137  | 1.421739  | 0.223982  | 0.245761  |
| S  | -2.063050 | 1.857082  | -0.207502 | 0.683022  | 0.692811  |
| C  | -3.873697 | 2.065302  | 0.163767  | -0.716386 | -0.705248 |
| H  | -4.022651 | 3.092752  | 0.495970  | 0.269026  | 0.301068  |
| H  | -4.425334 | 1.818735  | -0.742951 | 0.291939  | 0.290380  |
| H  | -4.091100 | 1.356226  | 0.962958  | 0.300417  | 0.297307  |
| C  | -1.732728 | 3.168435  | -1.487847 | -0.722613 | -0.709581 |
| H  | -2.314162 | 2.916510  | -2.374011 | 0.297611  | 0.293264  |
| H  | -2.005283 | 4.126891  | -1.045919 | 0.269965  | 0.300830  |
| H  | -0.664075 | 3.118292  | -1.692715 | 0.297092  | 0.299959  |
| O  | -1.241527 | 2.327043  | 1.169978  | -0.650176 | -0.686260 |
| Cl | -1.420982 | -2.536632 | -1.920311 | -0.200360 | -0.294600 |
| Cl | -3.190765 | 0.309800  | -2.875198 | -0.245084 | -0.311521 |

(2) trans N3' 3.7 2.8

| Atom | X         | Y         | Z         | in vacuo  | aqua      |
|------|-----------|-----------|-----------|-----------|-----------|
| Pt   | -1.564881 | -0.479730 | 0.022927  | -0.058907 | 0.005181  |
| N    | -0.334209 | 1.025328  | -0.415973 | -0.454769 | -0.458657 |
| N    | 0.943057  | 0.750967  | -0.663427 | 0.081997  | 0.057710  |
| N    | 1.537948  | 1.944560  | -0.859212 | -0.134554 | -0.133054 |
| C    | 0.638375  | 2.970249  | -0.749872 | -0.309595 | -0.276690 |

|   |           |           |           |           |           |
|---|-----------|-----------|-----------|-----------|-----------|
| H | 0.904400  | 4.006532  | -0.848249 | 0.299890  | 0.330978  |
| C | -0.582624 | 2.381173  | -0.457877 | 0.209637  | 0.196252  |
| C | -1.895841 | 3.004162  | -0.230226 | 0.359665  | 0.338400  |
| C | -2.709190 | 2.602020  | 0.845275  | -0.302107 | -0.315147 |
| H | -2.366129 | 1.838197  | 1.535953  | 0.278382  | 0.271444  |
| C | -2.338547 | 4.015575  | -1.101372 | -0.360375 | -0.369601 |
| H | -1.724812 | 4.304785  | -1.949360 | 0.228611  | 0.260978  |
| C | -3.961484 | 3.198663  | 1.032939  | -0.244348 | -0.270631 |
| H | -4.588875 | 2.872007  | 1.854346  | 0.237056  | 0.253745  |
| C | -3.586987 | 4.617588  | -0.903090 | -0.232698 | -0.253631 |
| H | -3.929100 | 5.388888  | -1.584689 | 0.224652  | 0.253484  |
| C | -4.402815 | 4.206407  | 0.162348  | -0.225693 | -0.246391 |
| H | -5.376250 | 4.662409  | 0.308181  | 0.229822  | 0.255803  |
| C | 3.005261  | 2.025195  | -1.062572 | -0.096110 | -0.098715 |
| H | 3.164559  | 2.423456  | -2.070476 | 0.262136  | 0.295344  |
| C | 3.650007  | 0.628834  | -0.985332 | -0.409561 | -0.408732 |
| H | 4.624715  | 0.701831  | -1.505868 | 0.196978  | 0.223028  |
| H | 3.045620  | -0.087614 | -1.544020 | 0.281827  | 0.260525  |
| C | 3.618212  | 2.980163  | -0.008136 | -0.153285 | -0.162628 |
| H | 3.185919  | 3.980538  | -0.106217 | 0.243248  | 0.271611  |
| C | 5.166390  | 3.013566  | -0.149023 | -0.452190 | -0.458396 |
| H | 5.486474  | 2.929640  | -1.193847 | 0.198514  | 0.209732  |
| H | 5.543903  | 3.968772  | 0.227642  | 0.227238  | 0.234901  |
| C | 3.417088  | 2.353018  | 1.384441  | -0.476058 | -0.480634 |
| H | 3.730412  | 3.053022  | 2.166367  | 0.207745  | 0.221671  |
| H | 2.395708  | 2.025995  | 1.593454  | 0.262566  | 0.237041  |
| C | 5.682597  | 1.827124  | 0.728194  | -0.447699 | -0.451628 |
| H | 6.280875  | 1.111692  | 0.153772  | 0.208434  | 0.213781  |
| H | 6.310686  | 2.193178  | 1.546182  | 0.225672  | 0.231501  |
| C | 4.390214  | 1.163497  | 1.297532  | -0.106873 | -0.115374 |
| H | 4.551749  | 0.713202  | 2.274423  | 0.252123  | 0.256160  |
| N | 3.803665  | 0.150735  | 0.395491  | -0.183127 | -0.198675 |
| C | 4.356244  | -1.221446 | 0.447186  | -0.137697 | -0.139006 |
| H | 5.342460  | -1.259562 | -0.061598 | 0.179200  | 0.201580  |
| C | 3.422783  | -2.183246 | -0.286061 | 0.403198  | 0.393652  |
| C | 4.552340  | -1.717308 | 1.893121  | -0.722058 | -0.727072 |
| H | 3.632202  | -1.570983 | 2.468541  | 0.233650  | 0.216964  |
| H | 4.778666  | -2.787340 | 1.875998  | 0.230218  | 0.229348  |
| H | 5.378884  | -1.210488 | 2.401342  | 0.198602  | 0.218291  |
| C | 3.932503  | -3.105369 | -1.213436 | -0.446225 | -0.455569 |
| H | 4.998050  | -3.116407 | -1.430691 | 0.227582  | 0.253063  |
| C | 2.043019  | -2.170873 | -0.016164 | -0.328398 | -0.340902 |
| H | 1.640965  | -1.442950 | 0.680231  | 0.299942  | 0.286644  |
| C | 3.078697  | -4.005669 | -1.870952 | -0.230133 | -0.253879 |
| H | 3.484105  | -4.711798 | -2.588626 | 0.218735  | 0.243676  |
| C | 1.189904  | -3.055595 | -0.685119 | -0.160987 | -0.200113 |
| H | 0.120229  | -2.998059 | -0.503025 | 0.188519  | 0.218169  |
| C | 1.700732  | -3.978190 | -1.611770 | -0.274504 | -0.303411 |
| H | 1.034400  | -4.656393 | -2.135538 | 0.219895  | 0.248291  |
| S | -3.054594 | -2.256535 | 0.607534  | 0.704607  | 0.703188  |

|    |           |           |           |           |           |
|----|-----------|-----------|-----------|-----------|-----------|
| C  | -2.224511 | -3.458856 | 1.762979  | -0.730087 | -0.717952 |
| H  | -2.933584 | -4.268597 | 1.935216  | 0.272789  | 0.300857  |
| H  | -1.291822 | -3.800004 | 1.314813  | 0.260129  | 0.282966  |
| H  | -2.024435 | -2.895225 | 2.672107  | 0.317955  | 0.302027  |
| C  | -3.450184 | -3.336604 | -0.855946 | -0.727719 | -0.717735 |
| H  | -2.519351 | -3.674658 | -1.309388 | 0.260671  | 0.288495  |
| H  | -4.065723 | -4.154842 | -0.481903 | 0.269773  | 0.297889  |
| H  | -3.995826 | -2.701165 | -1.550285 | 0.319648  | 0.303247  |
| O  | -4.517361 | -1.882482 | 1.311141  | -0.615321 | -0.705678 |
| Cl | -0.680590 | -0.453730 | 2.272431  | -0.262770 | -0.309307 |
| Cl | -2.351898 | -0.480406 | -2.245569 | -0.237459 | -0.298410 |

(2) trans N3' 4.6 2.6 (optimized crystal structure)

| Atom | X         | Y         | Z         | in vacuo  | aqua      |
|------|-----------|-----------|-----------|-----------|-----------|
| Pt   | 2.601960  | -0.361769 | -0.297564 | -0.059601 | 0.019348  |
| Cl   | 2.872743  | -1.496918 | 1.843929  | -0.310279 | -0.336486 |
| Cl   | 2.275444  | 0.795516  | -2.352316 | -0.202489 | -0.298213 |
| H    | -5.130249 | -1.976672 | 2.031093  | 0.255446  | 0.265962  |
| C    | -3.086303 | -2.608551 | 1.575583  | -0.485361 | -0.491706 |
| H    | -2.514801 | -1.751991 | 1.939383  | 0.248232  | 0.240910  |
| H    | -3.100260 | -3.371277 | 2.361391  | 0.220004  | 0.229760  |
| N    | -1.373094 | -1.121760 | -0.381651 | -0.130031 | -0.120186 |
| N    | -0.076035 | -1.456766 | -0.566767 | 0.025720  | -0.008577 |
| N    | 0.619017  | -0.416161 | -0.103134 | -0.431033 | -0.432507 |
| C    | -0.210582 | 0.573041  | 0.380801  | 0.184289  | 0.178664  |
| C    | -1.501344 | 0.107885  | 0.196502  | -0.258641 | -0.233423 |
| H    | -2.459660 | 0.525330  | 0.448679  | 0.351892  | 0.361611  |
| C    | 0.235007  | 1.857276  | 0.944478  | 0.351351  | 0.335741  |
| C    | -0.369240 | 3.044390  | 0.494888  | -0.347955 | -0.364498 |
| H    | -1.121319 | 3.001388  | -0.287197 | 0.247496  | 0.264472  |
| C    | 0.027066  | 4.278623  | 1.024859  | -0.235145 | -0.252057 |
| H    | -0.430272 | 5.193537  | 0.663470  | 0.225680  | 0.254371  |
| C    | 1.030122  | 4.332480  | 2.004820  | -0.229320 | -0.249135 |
| H    | 1.343059  | 5.289144  | 2.409796  | 0.228536  | 0.255639  |
| C    | 1.631153  | 3.146859  | 2.455740  | -0.250933 | -0.266982 |
| H    | 2.402177  | 3.184064  | 3.217889  | 0.227380  | 0.252952  |
| C    | 1.235320  | 1.909664  | 1.932112  | -0.326010 | -0.330646 |
| H    | 1.688955  | 0.991448  | 2.292989  | 0.274504  | 0.267880  |
| H    | -6.114498 | 0.165954  | 2.104622  | 0.213709  | 0.215865  |
| C    | -4.241675 | 3.252099  | -0.027602 | -0.236653 | -0.254870 |
| H    | -3.665823 | 3.891338  | 0.634250  | 0.236382  | 0.250212  |
| C    | -4.590568 | 1.959913  | 0.382382  | -0.406878 | -0.419093 |
| H    | -4.284633 | 1.599529  | 1.360978  | 0.256116  | 0.270880  |
| S    | 4.996459  | -0.282150 | -0.470663 | 0.730689  | 0.726331  |
| O    | 5.850991  | 0.358177  | -1.745445 | -0.611310 | -0.709058 |

|   |           |           |           |           |           |
|---|-----------|-----------|-----------|-----------|-----------|
| C | 5.658766  | -2.008531 | -0.234229 | -0.725535 | -0.711716 |
| H | 5.368060  | -2.556968 | -1.128831 | 0.291701  | 0.298098  |
| H | 5.201896  | -2.434110 | 0.658101  | 0.282908  | 0.286646  |
| H | 6.743353  | -1.922892 | -0.166367 | 0.269996  | 0.296160  |
| C | 5.622554  | 0.592128  | 1.051850  | -0.729962 | -0.713385 |
| H | 6.710835  | 0.535358  | 1.025005  | 0.273687  | 0.298311  |
| H | 5.186757  | 0.111409  | 1.926811  | 0.277669  | 0.286030  |
| H | 5.284145  | 1.622840  | 0.954928  | 0.292163  | 0.297552  |
| C | -4.521057 | -2.230810 | 1.165927  | -0.116054 | -0.119676 |
| N | -4.452389 | -1.048257 | 0.270601  | -0.208161 | -0.217502 |
| C | -3.755354 | -1.340534 | -0.996936 | -0.450756 | -0.454226 |
| H | -3.581237 | -0.404011 | -1.536051 | 0.269452  | 0.265222  |
| H | -4.376814 | -1.968504 | -1.660988 | 0.217618  | 0.241581  |
| C | -2.423211 | -2.076069 | -0.784904 | -0.113123 | -0.123039 |
| H | -2.092758 | -2.492165 | -1.740205 | 0.279104  | 0.294067  |
| C | -2.562849 | -3.209871 | 0.259109  | -0.153587 | -0.147686 |
| H | -1.605127 | -3.724627 | 0.359499  | 0.290091  | 0.278670  |
| C | -3.718188 | -4.166304 | -0.150271 | -0.445864 | -0.450450 |
| H | -3.781165 | -4.295801 | -1.236472 | 0.200417  | 0.210956  |
| H | -3.539209 | -5.155376 | 0.280688  | 0.232615  | 0.235907  |
| C | -5.013316 | -3.525702 | 0.450033  | -0.452945 | -0.456116 |
| H | -5.765837 | -3.304125 | -0.314813 | 0.207838  | 0.217250  |
| H | -5.479980 | -4.198807 | 1.175712  | 0.228784  | 0.234552  |
| C | -5.704895 | -0.293760 | 0.005526  | -0.145564 | -0.145727 |
| H | -6.270645 | -0.782642 | -0.812450 | 0.189251  | 0.209054  |
| C | -6.640231 | -0.218992 | 1.224466  | -0.723734 | -0.732354 |
| H | -7.071457 | -1.194288 | 1.469761  | 0.212923  | 0.224665  |
| H | -7.463288 | 0.464852  | 0.998173  | 0.235213  | 0.232263  |
| C | -5.337487 | 1.115269  | -0.460109 | 0.471705  | 0.457274  |
| C | -5.733282 | 1.591703  | -1.718574 | -0.440484 | -0.450287 |
| H | -6.308011 | 0.948182  | -2.379792 | 0.234168  | 0.256299  |
| C | -5.386044 | 2.887634  | -2.135598 | -0.222394 | -0.248562 |
| H | -5.693429 | 3.241352  | -3.114087 | 0.227482  | 0.246711  |
| C | -4.637562 | 3.720197  | -1.292242 | -0.245807 | -0.271980 |
| H | -4.365374 | 4.719727  | -1.614195 | 0.233397  | 0.252279  |

(3) N3' 0.0 0.0

| Atom | X         | Y         | Z        | in vacuo  | aqua      |
|------|-----------|-----------|----------|-----------|-----------|
| Pt   | 1.578210  | -0.407053 | 0.231883 | 0.462691  | 0.530307  |
| N    | 0.132128  | 1.004892  | 0.279495 | -0.463506 | -0.470372 |
| N    | -1.071414 | 0.537983  | 0.614615 | 0.045137  | 0.036690  |
| N    | -1.868038 | 1.612071  | 0.747951 | -0.116683 | -0.118203 |
| C    | -1.177500 | 2.765203  | 0.501103 | -0.308531 | -0.283444 |
| H    | -1.620173 | 3.743405  | 0.526288 | 0.303190  | 0.330571  |
| C    | 0.120904  | 2.380731  | 0.192432 | 0.179863  | 0.164796  |

|   |           |           |           |           |           |
|---|-----------|-----------|-----------|-----------|-----------|
| C | 1.282245  | 3.224359  | -0.137158 | 0.329361  | 0.320454  |
| C | 2.054042  | 2.971362  | -1.285636 | -0.332411 | -0.332819 |
| H | 1.803303  | 2.139317  | -1.934092 | 0.326536  | 0.303733  |
| C | 1.605514  | 4.307267  | 0.701437  | -0.369878 | -0.374188 |
| H | 1.021263  | 4.488911  | 1.598875  | 0.234290  | 0.260208  |
| C | 3.151297  | 3.790718  | -1.581342 | -0.252329 | -0.265194 |
| H | 3.743185  | 3.582627  | -2.465670 | 0.251916  | 0.253229  |
| C | 2.698983  | 5.128300  | 0.397376  | -0.232356 | -0.252231 |
| H | 2.949767  | 5.957612  | 1.050116  | 0.225965  | 0.252419  |
| C | 3.475624  | 4.868972  | -0.743233 | -0.227678 | -0.249781 |
| H | 4.326087  | 5.501325  | -0.975571 | 0.230960  | 0.254236  |
| C | -3.275801 | 1.418710  | 1.176825  | -0.081285 | -0.088679 |
| H | -3.290322 | 1.547313  | 2.264344  | 0.284124  | 0.300788  |
| C | -3.732110 | -0.012715 | 0.843852  | -0.414284 | -0.413732 |
| H | -4.608831 | -0.231535 | 1.481747  | 0.203167  | 0.224460  |
| H | -2.953034 | -0.723024 | 1.122144  | 0.274385  | 0.263664  |
| C | -4.200915 | 2.459682  | 0.503312  | -0.179094 | -0.186762 |
| H | -3.913553 | 3.474093  | 0.795687  | 0.249555  | 0.275055  |
| C | -5.683857 | 2.169212  | 0.878298  | -0.453926 | -0.459932 |
| H | -5.783719 | 1.796358  | 1.903606  | 0.202096  | 0.209762  |
| H | -6.259870 | 3.096980  | 0.815329  | 0.229422  | 0.235557  |
| C | -4.196043 | 2.223218  | -1.020202 | -0.459353 | -0.465038 |
| H | -4.763815 | 3.010526  | -1.528187 | 0.209371  | 0.220014  |
| H | -3.201488 | 2.160628  | -1.467390 | 0.248254  | 0.237604  |
| C | -6.180334 | 1.134302  | -0.184008 | -0.449369 | -0.452951 |
| H | -6.543238 | 0.206772  | 0.271065  | 0.211207  | 0.215592  |
| H | -7.001587 | 1.549705  | -0.776000 | 0.227637  | 0.231812  |
| C | -4.941141 | 0.875981  | -1.096078 | -0.123107 | -0.127330 |
| H | -5.223856 | 0.633848  | -2.118202 | 0.258284  | 0.261779  |
| N | -4.034164 | -0.168701 | -0.581129 | -0.199810 | -0.209134 |
| C | -4.234650 | -1.587479 | -0.943452 | -0.153573 | -0.150404 |
| H | -4.906824 | -2.076674 | -0.209979 | 0.185605  | 0.205115  |
| C | -2.892107 | -2.324395 | -0.913761 | 0.441571  | 0.433219  |
| C | -4.868364 | -1.772562 | -2.334809 | -0.713831 | -0.724968 |
| H | -4.278183 | -1.258382 | -3.100899 | 0.221409  | 0.216051  |
| H | -4.876866 | -2.838352 | -2.579724 | 0.236095  | 0.231594  |
| H | -5.900994 | -1.409857 | -2.370294 | 0.204102  | 0.221557  |
| C | -1.761400 | -1.753018 | -1.522890 | -0.361352 | -0.371113 |
| H | -1.832146 | -0.748106 | -1.924845 | 0.263969  | 0.267971  |
| C | -2.790131 | -3.612478 | -0.363365 | -0.465417 | -0.469083 |
| H | -3.658057 | -4.066149 | 0.110155  | 0.231733  | 0.254798  |
| C | -0.553758 | -2.458520 | -1.596091 | -0.204773 | -0.211620 |
| H | 0.306093  | -2.002208 | -2.075350 | 0.276063  | 0.258502  |
| C | -1.580338 | -4.325127 | -0.433046 | -0.244534 | -0.258672 |
| H | -1.516212 | -5.323424 | -0.011095 | 0.225027  | 0.244509  |
| C | -0.459468 | -3.750268 | -1.051313 | -0.273129 | -0.295869 |
| H | 0.478193  | -4.293219 | -1.107777 | 0.252985  | 0.252910  |
| S | 0.982975  | -1.055086 | 2.448405  | 0.726127  | 0.733463  |
| C | 2.490118  | -1.673016 | 3.345805  | -0.717676 | -0.709399 |
| H | 2.149338  | -2.197128 | 4.238481  | 0.264798  | 0.293517  |



|   |           |           |           |           |           |
|---|-----------|-----------|-----------|-----------|-----------|
| H | 3.034351  | -2.308756 | 2.647107  | 0.321064  | 0.307300  |
| H | 3.064793  | -0.785704 | 3.605410  | 0.285393  | 0.296883  |
| C | -0.043508 | -2.592016 | 2.257627  | -0.733274 | -0.723876 |
| H | 0.552615  | -3.324088 | 1.714335  | 0.296563  | 0.296978  |
| H | -0.326106 | -2.925198 | 3.256424  | 0.272585  | 0.300026  |
| H | -0.910125 | -2.300306 | 1.664753  | 0.309410  | 0.306396  |
| O | 0.155693  | -0.029122 | 3.470092  | -0.638555 | -0.699352 |
| O | 2.879915  | -1.937270 | 0.298834  | -0.487913 | -0.491481 |
| O | 1.995960  | -0.029442 | -1.689349 | -0.481207 | -0.493869 |
| C | 3.930142  | -2.071042 | -0.534974 | 0.286210  | 0.291817  |
| C | 3.213159  | -0.212736 | -2.237786 | 0.285572  | 0.289934  |
| C | 4.310810  | -0.848648 | -1.376973 | -0.544448 | -0.543300 |
| H | 5.134247  | -1.125295 | -2.033048 | 0.275345  | 0.264541  |
| H | 4.665196  | -0.070965 | -0.686191 | 0.252455  | 0.286126  |
| O | 4.596746  | -3.115537 | -0.567197 | -0.305649 | -0.369414 |
| O | 3.450998  | 0.174219  | -3.392516 | -0.312564 | -0.373728 |

(3) N2' 8.5 8.5

| Atom | X         | Y         | Z         | in vacuo  | aqua      |
|------|-----------|-----------|-----------|-----------|-----------|
| Pt   | 1.970764  | -0.575353 | -0.337552 | 0.468596  | 0.550689  |
| N    | 0.805150  | 2.121854  | -0.589734 | -0.067211 | -0.086379 |
| N    | 0.697808  | 0.951464  | 0.031969  | -0.350076 | -0.351997 |
| N    | -0.292372 | 1.013914  | 0.966704  | -0.069023 | -0.073022 |
| C    | -0.820632 | 2.259867  | 0.940741  | -0.264350 | -0.254785 |
| H    | -1.614703 | 2.563617  | 1.593719  | 0.298849  | 0.325018  |
| C    | -0.132018 | 2.964140  | -0.049684 | 0.060412  | 0.054499  |
| C    | -0.299038 | 4.348710  | -0.514252 | 0.356072  | 0.343586  |
| C    | 0.325239  | 4.766300  | -1.704409 | -0.346525 | -0.361325 |
| H    | 0.918761  | 4.054850  | -2.267838 | 0.266383  | 0.269704  |
| C    | -1.077228 | 5.265430  | 0.216154  | -0.340666 | -0.352493 |
| H    | -1.554506 | 4.963806  | 1.143936  | 0.213311  | 0.246712  |
| C    | 0.170195  | 6.082118  | -2.156062 | -0.234149 | -0.257808 |
| H    | 0.651609  | 6.395185  | -3.076203 | 0.229421  | 0.251655  |
| C    | -1.233825 | 6.580244  | -0.239446 | -0.237607 | -0.259625 |
| H    | -1.835467 | 7.280137  | 0.330352  | 0.227369  | 0.252207  |
| C    | -0.610237 | 6.993254  | -1.426812 | -0.231781 | -0.251119 |
| H    | -0.731676 | 8.011747  | -1.779503 | 0.231400  | 0.254553  |
| C    | -0.567343 | -0.144000 | 1.862061  | -0.039951 | -0.042406 |
| H    | 0.408071  | -0.388056 | 2.298343  | 0.289920  | 0.296324  |
| C    | -1.098160 | -1.362078 | 1.071866  | -0.409456 | -0.424482 |
| H    | -0.816261 | -2.254928 | 1.662522  | 0.186017  | 0.203170  |
| H    | -0.596915 | -1.453088 | 0.107661  | 0.331425  | 0.317140  |
| C    | -1.535289 | 0.236762  | 3.007695  | -0.221035 | -0.219390 |
| H    | -1.133530 | 1.090226  | 3.562803  | 0.268893  | 0.282854  |
| C    | -1.709666 | -1.006736 | 3.932789  | -0.453868 | -0.459405 |

|   |           |           |           |           |           |
|---|-----------|-----------|-----------|-----------|-----------|
| H | -0.783087 | -1.583368 | 4.023306  | 0.204474  | 0.210072  |
| H | -1.979576 | -0.668338 | 4.937646  | 0.229179  | 0.239214  |
| C | -2.987303 | 0.433918  | 2.503272  | -0.475932 | -0.481477 |
| H | -3.622887 | 0.752739  | 3.338041  | 0.207213  | 0.221732  |
| H | -3.123095 | 1.124433  | 1.670156  | 0.233422  | 0.236115  |
| C | -2.869988 | -1.836500 | 3.293756  | -0.453724 | -0.456144 |
| H | -2.555395 | -2.844101 | 3.009417  | 0.218389  | 0.217436  |
| H | -3.706483 | -1.939762 | 3.991950  | 0.225976  | 0.234474  |
| C | -3.318853 | -1.000564 | 2.054591  | -0.112520 | -0.113538 |
| H | -4.376119 | -1.136042 | 1.819594  | 0.271680  | 0.264988  |
| N | -2.527966 | -1.247705 | 0.837594  | -0.193561 | -0.191540 |
| C | -3.082181 | -2.141090 | -0.200003 | -0.147710 | -0.138067 |
| H | -2.343937 | -2.140642 | -1.013541 | 0.286809  | 0.249739  |
| C | -4.366524 | -1.519125 | -0.755069 | 0.389458  | 0.374732  |
| C | -3.236657 | -3.602737 | 0.266685  | -0.716829 | -0.725710 |
| H | -3.983191 | -3.698646 | 1.064474  | 0.190072  | 0.208908  |
| H | -3.528222 | -4.249551 | -0.566629 | 0.226518  | 0.218509  |
| H | -2.277307 | -3.972292 | 0.643386  | 0.219026  | 0.224724  |
| C | -5.576598 | -2.220407 | -0.871373 | -0.407973 | -0.419358 |
| H | -5.640784 | -3.256532 | -0.557093 | 0.241222  | 0.260947  |
| C | -4.323835 | -0.177012 | -1.183149 | -0.342334 | -0.360041 |
| H | -3.387758 | 0.365038  | -1.087576 | 0.245291  | 0.258753  |
| C | -6.720739 | -1.596753 | -1.399105 | -0.244591 | -0.270526 |
| H | -7.647902 | -2.155231 | -1.481963 | 0.217388  | 0.242818  |
| C | -5.457977 | 0.447339  | -1.712111 | -0.242284 | -0.266654 |
| H | -5.403027 | 1.479477  | -2.044098 | 0.218758  | 0.243957  |
| C | -6.666963 | -0.262454 | -1.820609 | -0.242798 | -0.266171 |
| H | -7.549139 | 0.218020  | -2.231498 | 0.221885  | 0.247606  |
| S | 3.458067  | 0.304199  | 1.287625  | 0.706989  | 0.719242  |
| C | 4.577432  | 1.583867  | 0.536212  | -0.722455 | -0.709893 |
| H | 5.194997  | 1.988728  | 1.337843  | 0.282961  | 0.303014  |
| H | 5.166119  | 1.105434  | -0.245822 | 0.275148  | 0.294041  |
| H | 3.917807  | 2.344461  | 0.120361  | 0.304827  | 0.299920  |
| C | 4.629075  | -1.012355 | 1.888799  | -0.702286 | -0.698549 |
| H | 4.929520  | -1.597115 | 1.019386  | 0.330242  | 0.312881  |
| H | 5.451684  | -0.516311 | 2.403275  | 0.259176  | 0.291351  |
| H | 4.043268  | -1.623350 | 2.573336  | 0.291103  | 0.298485  |
| O | 2.726171  | 1.008865  | 2.613260  | -0.636632 | -0.697144 |
| O | 3.332899  | -2.012105 | -0.637576 | -0.508968 | -0.509128 |
| O | 0.619322  | -1.358093 | -1.584882 | -0.478656 | -0.500526 |
| C | 3.290563  | -2.987101 | -1.569933 | 0.287386  | 0.290210  |
| C | 0.793470  | -2.541678 | -2.214036 | 0.289815  | 0.293217  |
| C | 2.214475  | -2.891088 | -2.658620 | -0.534459 | -0.531313 |
| H | 2.190924  | -3.840791 | -3.189789 | 0.272493  | 0.261242  |
| H | 2.537403  | -2.107039 | -3.356030 | 0.251828  | 0.282814  |
| O | 4.135888  | -3.891288 | -1.578801 | -0.300844 | -0.364979 |
| O | -0.177101 | -3.264965 | -2.481035 | -0.296544 | -0.354257 |

(1) trans N3', N3' 0.0 0.0 (optimized crystal structure)

| Atom | X         | Y         | Z         | in vacuo  | aqua      |
|------|-----------|-----------|-----------|-----------|-----------|
| Pt   | 0.000096  | -0.000432 | -0.001159 | 0.223676  | 0.233555  |
| Cl   | -0.066385 | 0.886601  | 2.247798  | -0.277249 | -0.329677 |
| Cl   | 0.066522  | -0.887276 | -2.250197 | -0.277250 | -0.329688 |
| C    | 6.940702  | 2.300677  | 1.301269  | -0.116941 | -0.121323 |
| H    | 7.564403  | 2.063912  | 2.161103  | 0.252714  | 0.265246  |
| N    | 7.003242  | 1.167604  | 0.343953  | -0.202436 | -0.213892 |
| C    | 6.282439  | 1.448724  | -0.912684 | -0.451155 | -0.455889 |
| H    | 6.208049  | 0.527206  | -1.498891 | 0.266551  | 0.264288  |
| H    | 6.839356  | 2.169272  | -1.539867 | 0.212647  | 0.239732  |
| C    | 4.881606  | 2.034295  | -0.678423 | -0.108277 | -0.120384 |
| H    | 4.518117  | 2.462811  | -1.616536 | 0.272074  | 0.292372  |
| C    | 4.901814  | 3.124916  | 0.419664  | -0.155570 | -0.149120 |
| H    | 3.896148  | 3.533410  | 0.535080  | 0.297423  | 0.279720  |
| C    | 5.958138  | 4.211142  | 0.073795  | -0.447694 | -0.452041 |
| H    | 6.018206  | 4.399658  | -1.004165 | 0.196378  | 0.209719  |
| H    | 5.676584  | 5.154983  | 0.549424  | 0.230579  | 0.235150  |
| C    | 7.305963  | 3.674865  | 0.660392  | -0.452359 | -0.455500 |
| H    | 8.084977  | 3.570903  | -0.103320 | 0.205032  | 0.216535  |
| H    | 7.694065  | 4.352766  | 1.426991  | 0.226386  | 0.234076  |
| C    | 5.471641  | 2.509131  | 1.709482  | -0.483442 | -0.489750 |
| H    | 4.984950  | 1.581189  | 2.016744  | 0.252695  | 0.239038  |
| H    | 5.400908  | 3.224638  | 2.535628  | 0.217619  | 0.228481  |
| N    | 3.929008  | 0.967892  | -0.324813 | -0.134082 | -0.124250 |
| N    | 2.601465  | 1.225719  | -0.407397 | 0.011921  | -0.023317 |
| N    | 1.998604  | 0.109490  | 0.005776  | -0.421833 | -0.426352 |
| C    | 2.920912  | -0.856029 | 0.353846  | 0.180250  | 0.168636  |
| C    | 4.167908  | -0.291660 | 0.139034  | -0.264870 | -0.237466 |
| H    | 5.161014  | -0.663746 | 0.313583  | 0.342446  | 0.354768  |
| C    | 2.620406  | -2.214867 | 0.833594  | 0.354271  | 0.335908  |
| C    | 3.398379  | -3.284986 | 0.352541  | -0.354745 | -0.362942 |
| H    | 4.162521  | -3.099306 | -0.396987 | 0.241860  | 0.262248  |
| C    | 3.165604  | -4.588315 | 0.807756  | -0.245088 | -0.258001 |
| H    | 3.760730  | -5.409959 | 0.422364  | 0.218974  | 0.253346  |
| C    | 2.149193  | -4.832489 | 1.744659  | -0.235371 | -0.252383 |
| H    | 1.961478  | -5.843151 | 2.092744  | 0.222014  | 0.254448  |
| C    | 1.373067  | -3.766408 | 2.224136  | -0.255725 | -0.273215 |
| H    | 0.585615  | -3.947551 | 2.947639  | 0.226057  | 0.251966  |
| C    | 1.606770  | -2.459602 | 1.777461  | -0.301607 | -0.322141 |
| H    | 1.013145  | -1.636798 | 2.163326  | 0.287660  | 0.274589  |
| C    | 8.330451  | 0.570143  | 0.052110  | -0.143637 | -0.146111 |
| H    | 8.845187  | 1.161389  | -0.731975 | 0.185827  | 0.207849  |
| C    | 9.262224  | 0.528331  | 1.275892  | -0.724210 | -0.731109 |
| H    | 9.583212  | 1.529229  | 1.580140  | 0.212374  | 0.224465  |
| H    | 10.155877 | -0.049082 | 1.021829  | 0.232699  | 0.231993  |

|   |           |           |           |           |           |
|---|-----------|-----------|-----------|-----------|-----------|
| H | 8.775148  | 0.039816  | 2.126394  | 0.215492  | 0.215961  |
| C | 8.125015  | -0.843670 | -0.491943 | 0.468281  | 0.454402  |
| C | 8.607806  | -1.214181 | -1.755654 | -0.441901 | -0.450432 |
| H | 9.128362  | -0.481478 | -2.367150 | 0.233008  | 0.256227  |
| C | 8.416506  | -2.518596 | -2.241299 | -0.223069 | -0.248183 |
| H | 8.789841  | -2.790253 | -3.223226 | 0.224938  | 0.246683  |
| C | 7.737980  | -3.465925 | -1.462179 | -0.246628 | -0.272258 |
| H | 7.585285  | -4.472396 | -1.837244 | 0.231298  | 0.252202  |
| C | 7.254709  | -3.103425 | -0.193263 | -0.237027 | -0.255327 |
| H | 6.729957  | -3.830423 | 0.418596  | 0.237982  | 0.250876  |
| C | 7.448485  | -1.802270 | 0.285472  | -0.407395 | -0.420676 |
| H | 7.072858  | -1.521470 | 1.265675  | 0.263022  | 0.274045  |
| C | -6.943084 | -2.297419 | -1.303480 | -0.116899 | -0.121276 |
| H | -7.567654 | -2.058932 | -2.162208 | 0.252713  | 0.265244  |
| N | -7.004025 | -1.165881 | -0.344211 | -0.202463 | -0.213915 |
| C | -6.281917 | -1.449473 | 0.911158  | -0.451068 | -0.455784 |
| H | -6.206299 | -0.528943 | 1.498742  | 0.266603  | 0.264297  |
| H | -6.838541 | -2.170724 | 1.537782  | 0.212636  | 0.239729  |
| C | -4.881643 | -2.035379 | 0.674349  | -0.108360 | -0.120471 |
| H | -4.517340 | -2.465726 | 1.611301  | 0.272088  | 0.292362  |
| C | -4.903563 | -3.124082 | -0.425612 | -0.155516 | -0.149070 |
| H | -3.898209 | -3.532835 | -0.542854 | 0.297385  | 0.279696  |
| C | -5.959984 | -4.210426 | -0.080391 | -0.447660 | -0.452006 |
| H | -6.018867 | -4.400784 | 0.997309  | 0.196391  | 0.209727  |
| H | -5.679427 | -5.153567 | -0.557992 | 0.230584  | 0.235154  |
| C | -7.308246 | -3.672501 | -0.664471 | -0.452364 | -0.455508 |
| H | -8.086290 | -3.569455 | 0.100352  | 0.205034  | 0.216535  |
| H | -7.697605 | -4.348921 | -1.431739 | 0.226387  | 0.234080  |
| C | -5.474602 | -2.505881 | -1.713739 | -0.483540 | -0.489846 |
| H | -4.987832 | -1.577672 | -2.020060 | 0.252717  | 0.239085  |
| H | -5.405182 | -3.220050 | -2.541153 | 0.217633  | 0.228504  |
| N | -3.928889 | -0.968827 | 0.321687  | -0.134020 | -0.124181 |
| N | -2.601372 | -1.226815 | 0.404199  | 0.011912  | -0.023340 |
| N | -1.998409 | -0.110337 | -0.008152 | -0.421852 | -0.426372 |
| C | -2.920616 | 0.855502  | -0.355588 | 0.180279  | 0.168667  |
| C | -4.167674 | 0.291078  | -0.141289 | -0.264961 | -0.237576 |
| H | -5.160815 | 0.663229  | -0.315544 | 0.342480  | 0.354825  |
| C | -2.619829 | 2.214642  | -0.834291 | 0.354279  | 0.335914  |
| C | -3.397270 | 3.284626  | -0.352098 | -0.354799 | -0.362964 |
| H | -4.161220 | 3.098559  | 0.397530  | 0.241854  | 0.262226  |
| C | -3.164134 | 4.588258  | -0.806263 | -0.245035 | -0.257999 |
| H | -3.758831 | 5.409804  | -0.419999 | 0.218957  | 0.253343  |
| C | -2.147899 | 4.832849  | -1.743248 | -0.235367 | -0.252375 |
| H | -1.959908 | 5.843738  | -2.090522 | 0.222014  | 0.254451  |
| C | -1.372297 | 3.766895  | -2.223856 | -0.255700 | -0.273197 |
| H | -0.584971 | 3.948370  | -2.947413 | 0.226052  | 0.251968  |
| C | -1.606358 | 2.459798  | -1.778225 | -0.301657 | -0.322166 |
| H | -1.013122 | 1.637098  | -2.164916 | 0.287656  | 0.274577  |
| C | -8.330839 | -0.568772 | -0.049756 | -0.143558 | -0.146025 |
| H | -8.845096 | -1.161869 | 0.733246  | 0.185819  | 0.207837  |

|   |            |           |           |           |           |
|---|------------|-----------|-----------|-----------|-----------|
| C | -9.263538  | -0.523612 | -1.272713 | -0.724233 | -0.731133 |
| H | -9.585337  | -1.523616 | -1.579034 | 0.212360  | 0.224454  |
| H | -10.156675 | 0.053712  | -1.016646 | 0.232701  | 0.231986  |
| H | -8.776812  | -0.033427 | -2.122456 | 0.215483  | 0.215959  |
| C | -8.124594  | 0.843578  | 0.497747  | 0.468203  | 0.454294  |
| C | -8.605964  | 1.210789  | 1.762961  | -0.441845 | -0.450380 |
| H | -9.125953  | 0.476524  | 2.373063  | 0.233000  | 0.256221  |
| C | -8.413964  | 2.513871  | 2.251886  | -0.223081 | -0.248199 |
| H | -8.786194  | 2.782949  | 3.234941  | 0.224940  | 0.246684  |
| C | -7.736163  | 3.463187  | 1.474562  | -0.246586 | -0.272258 |
| H | -7.582921  | 4.468631  | 1.852144  | 0.231294  | 0.252197  |
| C | -7.254333  | 3.104008  | 0.204158  | -0.237086 | -0.255419 |
| H | -6.730244  | 3.832608  | -0.406364 | 0.237891  | 0.250857  |
| C | -7.448781  | 1.804160  | -0.277842 | -0.407117 | -0.420403 |
| H | -7.074364  | 1.526008  | -1.259263 | 0.262838  | 0.273896  |

(1) trans N3', N3' 4.6 3.6

| Atom | X         | Y         | Z         | in vacuo  | aqua      |
|------|-----------|-----------|-----------|-----------|-----------|
| Pt   | -0.018373 | -0.056073 | -0.128034 | 0.231599  | 0.239797  |
| N    | -2.010837 | -0.220584 | -0.029107 | -0.427564 | -0.431522 |
| N    | -2.583271 | -1.425522 | -0.007763 | 0.012469  | -0.025901 |
| N    | -3.917896 | -1.189078 | -0.044903 | -0.120859 | -0.111165 |
| C    | -4.189209 | 0.148599  | -0.082744 | -0.293304 | -0.255877 |
| H    | -5.198231 | 0.520006  | -0.081926 | 0.355613  | 0.363095  |
| C    | -2.957402 | 0.782449  | -0.070645 | 0.186176  | 0.174571  |
| C    | -2.679221 | 2.227654  | -0.099274 | 0.363276  | 0.340184  |
| C    | -3.423513 | 3.047726  | -0.966924 | -0.353610 | -0.368269 |
| H    | -4.144704 | 2.598158  | -1.643623 | 0.218700  | 0.253944  |
| C    | -1.711898 | 2.803761  | 0.744036  | -0.307398 | -0.325684 |
| H    | -1.141465 | 2.178695  | 1.424020  | 0.285285  | 0.272213  |
| C    | -3.206630 | 4.430675  | -0.993826 | -0.241558 | -0.257284 |
| H    | -3.775550 | 5.054389  | -1.675528 | 0.220696  | 0.253268  |
| C    | -1.493032 | 4.186555  | 0.708966  | -0.252623 | -0.271320 |
| H    | -0.741257 | 4.622312  | 1.357998  | 0.225955  | 0.252090  |
| C    | -2.237957 | 5.003499  | -0.155138 | -0.233667 | -0.251337 |
| H    | -2.061964 | 6.074070  | -0.179785 | 0.222865  | 0.254825  |
| C    | -4.844004 | -2.332493 | -0.015441 | -0.115400 | -0.125856 |
| H    | -4.273474 | -3.173594 | -0.417342 | 0.275666  | 0.285941  |
| C    | -6.058995 | -2.059711 | -0.924816 | -0.440600 | -0.443397 |
| H    | -6.500757 | -3.036215 | -1.191452 | 0.207668  | 0.230143  |
| H    | -5.718701 | -1.598676 | -1.858264 | 0.242990  | 0.250954  |
| C    | -5.283707 | -2.655323 | 1.436944  | -0.146676 | -0.141409 |
| H    | -4.396224 | -2.880495 | 2.032728  | 0.280217  | 0.272449  |
| C    | -6.311344 | -3.821609 | 1.427583  | -0.451030 | -0.454655 |
| H    | -6.086998 | -4.564660 | 0.654150  | 0.199523  | 0.210956  |

|    |            |           |           |           |           |
|----|------------|-----------|-----------|-----------|-----------|
| H  | -6.280038  | -4.339718 | 2.390413  | 0.231550  | 0.237094  |
| C  | -6.129695  | -1.496832 | 2.002179  | -0.493714 | -0.500426 |
| H  | -6.384414  | -1.697604 | 3.048897  | 0.217178  | 0.229342  |
| H  | -5.655976  | -0.516118 | 1.950921  | 0.262512  | 0.251242  |
| C  | -7.699368  | -3.134502 | 1.208482  | -0.444793 | -0.447868 |
| H  | -8.212489  | -3.508456 | 0.318529  | 0.213172  | 0.221859  |
| H  | -8.360408  | -3.311182 | 2.063005  | 0.226343  | 0.233935  |
| C  | -7.378324  | -1.607946 | 1.106181  | -0.110172 | -0.113691 |
| H  | -8.202544  | -0.983157 | 1.455221  | 0.263906  | 0.267008  |
| N  | -7.005107  | -1.162767 | -0.256063 | -0.207566 | -0.217391 |
| C  | -8.070614  | -0.590703 | -1.111185 | -0.143095 | -0.139740 |
| H  | -7.586956  | -0.391443 | -2.077097 | 0.213861  | 0.228120  |
| C  | -8.492363  | 0.766265  | -0.543604 | 0.441597  | 0.416162  |
| C  | -9.249117  | -1.548934 | -1.384711 | -0.715706 | -0.720990 |
| H  | -8.887868  | -2.466202 | -1.862220 | 0.211101  | 0.222201  |
| H  | -9.766373  | -1.834687 | -0.463023 | 0.203173  | 0.210310  |
| H  | -9.978053  | -1.080530 | -2.054037 | 0.226206  | 0.224253  |
| C  | -7.611280  | 1.854971  | -0.690676 | -0.364681 | -0.378803 |
| H  | -6.688326  | 1.718470  | -1.248827 | 0.213840  | 0.233563  |
| C  | -9.695229  | 0.969510  | 0.151008  | -0.378504 | -0.386171 |
| H  | -10.403323 | 0.155409  | 0.268229  | 0.230980  | 0.253488  |
| C  | -7.909773  | 3.108250  | -0.146002 | -0.236864 | -0.263280 |
| H  | -7.212691  | 3.930920  | -0.267268 | 0.230827  | 0.247639  |
| C  | -10.002921 | 2.225647  | 0.699808  | -0.250522 | -0.276509 |
| H  | -10.936117 | 2.364698  | 1.236068  | 0.221994  | 0.245149  |
| C  | -9.110913  | 3.296748  | 0.558344  | -0.240498 | -0.266017 |
| H  | -9.347488  | 4.265685  | 0.985126  | 0.228896  | 0.250183  |
| Cl | -0.172593  | 0.004995  | -2.530269 | -0.261516 | -0.323166 |
| Cl | 0.139119   | -0.112836 | 2.295589  | -0.295104 | -0.338514 |
| N  | 1.971346   | 0.114621  | -0.267541 | -0.427575 | -0.432024 |
| N  | 2.537108   | 1.321888  | -0.237955 | 0.015919  | -0.021562 |
| N  | 3.859380   | 1.105408  | -0.437018 | -0.119479 | -0.110545 |
| C  | 4.131826   | -0.223861 | -0.585157 | -0.297409 | -0.259108 |
| H  | 5.132472   | -0.593688 | -0.712735 | 0.327715  | 0.344087  |
| C  | 2.912190   | -0.873551 | -0.473154 | 0.201361  | 0.187917  |
| C  | 2.636499   | -2.317743 | -0.546773 | 0.360671  | 0.338867  |
| C  | 3.292136   | -3.089910 | -1.522962 | -0.358846 | -0.371995 |
| H  | 3.948955   | -2.606431 | -2.240035 | 0.226606  | 0.259046  |
| C  | 1.757974   | -2.939957 | 0.359312  | -0.305956 | -0.322969 |
| H  | 1.259039   | -2.353146 | 1.124198  | 0.286336  | 0.273290  |
| C  | 3.072353   | -4.470768 | -1.597014 | -0.237052 | -0.256001 |
| H  | 3.574514   | -5.057570 | -2.358911 | 0.220750  | 0.252444  |
| C  | 1.535265   | -4.319919 | 0.276516  | -0.252995 | -0.271127 |
| H  | 0.851248   | -4.790523 | 0.974290  | 0.226336  | 0.252015  |
| C  | 2.190073   | -5.088930 | -0.697578 | -0.232085 | -0.249524 |
| H  | 2.012152   | -6.157718 | -0.758666 | 0.222843  | 0.254636  |
| C  | 4.769059   | 2.263608  | -0.393786 | -0.098057 | -0.110426 |
| H  | 4.249427   | 3.065918  | -0.924478 | 0.271826  | 0.287583  |
| C  | 6.089863   | 1.952599  | -1.121864 | -0.458165 | -0.465370 |
| H  | 6.532413   | 2.922634  | -1.409874 | 0.209435  | 0.231351  |

|   |           |           |           |           |           |
|---|-----------|-----------|-----------|-----------|-----------|
| H | 5.883213  | 1.415578  | -2.054789 | 0.242311  | 0.255544  |
| C | 5.016264  | 2.695449  | 1.075210  | -0.157875 | -0.151878 |
| H | 4.055232  | 2.926678  | 1.539264  | 0.290995  | 0.277022  |
| C | 6.006542  | 3.890873  | 1.115764  | -0.448514 | -0.451996 |
| H | 5.864010  | 4.574533  | 0.271130  | 0.196487  | 0.209424  |
| H | 5.839995  | 4.469528  | 2.028881  | 0.231517  | 0.236276  |
| C | 5.807834  | 1.594473  | 1.808802  | -0.483788 | -0.491129 |
| H | 5.910565  | 1.849307  | 2.869179  | 0.218697  | 0.227879  |
| H | 5.365534  | 0.598687  | 1.736450  | 0.248022  | 0.240100  |
| C | 7.426665  | 3.237522  | 1.119845  | -0.456493 | -0.459678 |
| H | 8.041951  | 3.572034  | 0.280689  | 0.211679  | 0.221096  |
| H | 7.967697  | 3.488491  | 2.037659  | 0.228386  | 0.234167  |
| C | 7.162117  | 1.698677  | 1.081337  | -0.104815 | -0.101327 |
| H | 7.953936  | 1.131917  | 1.573687  | 0.271019  | 0.267501  |
| N | 6.979315  | 1.146126  | -0.281889 | -0.217246 | -0.225708 |
| C | 8.164051  | 0.594609  | -0.967742 | -0.092463 | -0.091333 |
| H | 7.785850  | 0.212876  | -1.928701 | 0.220536  | 0.236261  |
| C | 8.713002  | -0.620009 | -0.204768 | 0.365923  | 0.349691  |
| C | 9.248217  | 1.648068  | -1.298605 | -0.708193 | -0.713554 |
| H | 8.792429  | 2.522740  | -1.774337 | 0.211793  | 0.223283  |
| H | 9.772871  | 1.976504  | -0.395277 | 0.214874  | 0.213706  |
| H | 9.986423  | 1.249067  | -2.001077 | 0.212873  | 0.219691  |
| C | 7.832405  | -1.462985 | 0.501024  | -0.341081 | -0.348558 |
| H | 6.783062  | -1.197727 | 0.557216  | 0.243570  | 0.250551  |
| C | 10.076919 | -0.961148 | -0.233335 | -0.389197 | -0.403341 |
| H | 10.789356 | -0.334719 | -0.758387 | 0.227304  | 0.250154  |
| C | 8.295069  | -2.613120 | 1.150694  | -0.249786 | -0.276080 |
| H | 7.595148  | -3.244950 | 1.687636  | 0.229589  | 0.245736  |
| C | 10.546174 | -2.113252 | 0.417383  | -0.244563 | -0.270383 |
| H | 11.603339 | -2.356294 | 0.382094  | 0.221484  | 0.244575  |
| C | 9.657928  | -2.946649 | 1.109909  | -0.242047 | -0.267303 |
| H | 10.019997 | -3.837499 | 1.612256  | 0.228016  | 0.249288  |

**(1)** cis N3', N3' 11.6 2.5

| Atom | X        | Y         | Z         | in vacuo  | aqua      |
|------|----------|-----------|-----------|-----------|-----------|
| Pt   | 0.172381 | -3.232420 | -0.023200 | 0.160555  | 0.192116  |
| N    | 1.397172 | -1.695406 | -0.496176 | -0.435381 | -0.446753 |
| N    | 1.009275 | -0.847419 | -1.455861 | -0.008043 | -0.015484 |
| N    | 1.974800 | 0.102796  | -1.511643 | -0.122708 | -0.111360 |
| C    | 2.958499 | -0.132264 | -0.597858 | -0.281348 | -0.239894 |
| H    | 3.770443 | 0.558138  | -0.455677 | 0.342881  | 0.351038  |
| C    | 2.594222 | -1.297140 | 0.063944  | 0.172469  | 0.165450  |
| C    | 3.313504 | -1.950920 | 1.167882  | 0.385859  | 0.358755  |
| C    | 4.720733 | -1.933801 | 1.159599  | -0.352960 | -0.367324 |
| H    | 5.249836 | -1.506714 | 0.311985  | 0.213972  | 0.253491  |

|    |           |           |           |           |           |
|----|-----------|-----------|-----------|-----------|-----------|
| C  | 2.635298  | -2.552746 | 2.241688  | -0.279893 | -0.310652 |
| H  | 1.551278  | -2.580121 | 2.252252  | 0.275551  | 0.276758  |
| C  | 5.442820  | -2.510163 | 2.210598  | -0.244259 | -0.261104 |
| H  | 6.527587  | -2.508543 | 2.186751  | 0.220885  | 0.253236  |
| C  | 3.359375  | -3.137384 | 3.286585  | -0.255115 | -0.279778 |
| H  | 2.826898  | -3.618909 | 4.099157  | 0.229683  | 0.252057  |
| C  | 4.761952  | -3.115636 | 3.278047  | -0.230627 | -0.250989 |
| H  | 5.318537  | -3.578340 | 4.086305  | 0.225538  | 0.254730  |
| C  | 1.783614  | 1.251538  | -2.410677 | -0.125551 | -0.137300 |
| H  | 1.241407  | 0.861925  | -3.276183 | 0.273844  | 0.287805  |
| C  | 3.140100  | 1.818127  | -2.872367 | -0.447516 | -0.452194 |
| H  | 2.961161  | 2.382678  | -3.804553 | 0.211045  | 0.232797  |
| H  | 3.814357  | 0.993090  | -3.126737 | 0.243653  | 0.252503  |
| C  | 0.922266  | 2.333490  | -1.707614 | -0.143923 | -0.140189 |
| H  | -0.037303 | 1.888793  | -1.433371 | 0.288511  | 0.286773  |
| C  | 0.766085  | 3.573154  | -2.629254 | -0.465376 | -0.467795 |
| H  | 0.681413  | 3.294617  | -3.685339 | 0.206635  | 0.215144  |
| H  | -0.150199 | 4.110561  | -2.365254 | 0.228066  | 0.236516  |
| C  | 1.699220  | 2.923637  | -0.513414 | -0.478283 | -0.484481 |
| H  | 1.067445  | 3.638099  | 0.028887  | 0.204817  | 0.224465  |
| H  | 2.076363  | 2.187965  | 0.198873  | 0.259938  | 0.249609  |
| C  | 2.029878  | 4.448416  | -2.343126 | -0.445163 | -0.447603 |
| H  | 2.622687  | 4.627312  | -3.243798 | 0.216964  | 0.222452  |
| H  | 1.744664  | 5.426648  | -1.942992 | 0.226723  | 0.234981  |
| C  | 2.830899  | 3.655102  | -1.260136 | -0.125187 | -0.127942 |
| H  | 3.410167  | 4.309720  | -0.606673 | 0.266221  | 0.267112  |
| N  | 3.744178  | 2.630493  | -1.813332 | -0.203699 | -0.214106 |
| C  | 5.163441  | 3.007501  | -2.013244 | -0.145182 | -0.139812 |
| H  | 5.635666  | 2.120721  | -2.457646 | 0.216063  | 0.229300  |
| C  | 5.820683  | 3.218767  | -0.647595 | 0.440538  | 0.415353  |
| C  | 5.376316  | 4.175869  | -2.998591 | -0.715559 | -0.722090 |
| H  | 4.947448  | 3.930751  | -3.976281 | 0.211525  | 0.222808  |
| H  | 4.901867  | 5.098239  | -2.648051 | 0.202416  | 0.210722  |
| H  | 6.444379  | 4.372920  | -3.135707 | 0.229452  | 0.224786  |
| C  | 6.091211  | 2.088533  | 0.147498  | -0.352689 | -0.368815 |
| H  | 5.884195  | 1.097512  | -0.248445 | 0.206206  | 0.227354  |
| C  | 6.131196  | 4.487392  | -0.132609 | -0.379953 | -0.386284 |
| H  | 5.951989  | 5.377857  | -0.726551 | 0.231702  | 0.253850  |
| C  | 6.638615  | 2.216704  | 1.428278  | -0.240259 | -0.266298 |
| H  | 6.834642  | 1.331292  | 2.023925  | 0.233276  | 0.247533  |
| C  | 6.682992  | 4.624540  | 1.152079  | -0.251163 | -0.276533 |
| H  | 6.916873  | 5.612760  | 1.534697  | 0.223272  | 0.245236  |
| C  | 6.933319  | 3.492308  | 1.938423  | -0.239793 | -0.264956 |
| H  | 7.358178  | 3.598534  | 2.930915  | 0.230708  | 0.250237  |
| Cl | 1.894911  | -4.760276 | -0.649684 | -0.226574 | -0.317633 |
| Cl | -1.332558 | -4.966669 | 0.632219  | -0.226705 | -0.317473 |
| N  | -1.235301 | -1.856859 | 0.451872  | -0.436316 | -0.448751 |
| N  | -0.917092 | -0.939737 | 1.373296  | -0.007171 | -0.011704 |
| N  | -2.003047 | -0.136651 | 1.479486  | -0.120555 | -0.109061 |
| C  | -2.997590 | -0.533253 | 0.636695  | -0.286502 | -0.246309 |



|   |           |           |           |           |           |
|---|-----------|-----------|-----------|-----------|-----------|
| H | -3.922542 | 0.006802  | 0.553137  | 0.324550  | 0.340523  |
| C | -2.508612 | -1.645746 | -0.037675 | 0.179461  | 0.171034  |
| C | -3.181636 | -2.409971 | -1.099141 | 0.384708  | 0.359727  |
| C | -4.580413 | -2.555860 | -1.047220 | -0.357408 | -0.369062 |
| H | -5.135251 | -2.163866 | -0.199495 | 0.220607  | 0.256941  |
| C | -2.468066 | -2.958705 | -2.178816 | -0.277794 | -0.307167 |
| H | -1.388826 | -2.861147 | -2.222707 | 0.275285  | 0.275109  |
| C | -5.258363 | -3.243210 | -2.060271 | -0.241430 | -0.261042 |
| H | -6.335097 | -3.363225 | -2.004383 | 0.221305  | 0.252436  |
| C | -3.147014 | -3.654077 | -3.185046 | -0.253983 | -0.278860 |
| H | -2.584383 | -4.093177 | -4.001285 | 0.229815  | 0.251963  |
| C | -4.541557 | -3.796600 | -3.132379 | -0.229421 | -0.249612 |
| H | -5.062822 | -4.343969 | -3.910717 | 0.225454  | 0.254489  |
| C | -1.912777 | 1.042558  | 2.356294  | -0.115126 | -0.128086 |
| H | -1.357133 | 0.711751  | 3.237847  | 0.271645  | 0.287391  |
| C | -3.310641 | 1.519073  | 2.793264  | -0.454953 | -0.461565 |
| H | -3.175600 | 2.089740  | 3.729006  | 0.210438  | 0.231711  |
| H | -3.936666 | 0.654780  | 3.042128  | 0.245680  | 0.255518  |
| C | -1.118714 | 2.171463  | 1.647573  | -0.144073 | -0.140300 |
| H | -0.133575 | 1.785994  | 1.373654  | 0.289021  | 0.284531  |
| C | -1.037797 | 3.419151  | 2.567398  | -0.462574 | -0.465226 |
| H | -0.937339 | 3.147014  | 3.623807  | 0.205793  | 0.214551  |
| H | -0.154653 | 4.009580  | 2.304145  | 0.228195  | 0.236125  |
| C | -1.931889 | 2.707706  | 0.452144  | -0.479507 | -0.485881 |
| H | -1.343355 | 3.450216  | -0.100173 | 0.208206  | 0.225481  |
| H | -2.269172 | 1.940116  | -0.248218 | 0.249170  | 0.244027  |
| C | -2.350742 | 4.216829  | 2.279427  | -0.457765 | -0.460164 |
| H | -2.955177 | 4.361618  | 3.178300  | 0.216124  | 0.221691  |
| H | -2.124207 | 5.210231  | 1.879462  | 0.228543  | 0.235901  |
| C | -3.101379 | 3.380229  | 1.194613  | -0.116371 | -0.113020 |
| H | -3.714484 | 4.004785  | 0.543036  | 0.272749  | 0.267836  |
| N | -3.958045 | 2.301183  | 1.736623  | -0.214018 | -0.222172 |
| C | -5.386706 | 2.604252  | 1.960028  | -0.099493 | -0.095976 |
| H | -5.829532 | 1.656404  | 2.302105  | 0.224603  | 0.237038  |
| C | -6.073022 | 2.951841  | 0.631179  | 0.368098  | 0.352041  |
| C | -5.642162 | 3.647944  | 3.072278  | -0.712129 | -0.718387 |
| H | -5.077328 | 3.387811  | 3.973536  | 0.213334  | 0.224789  |
| H | -5.344578 | 4.652581  | 2.753516  | 0.212534  | 0.213641  |
| H | -6.699676 | 3.674028  | 3.352532  | 0.218175  | 0.221128  |
| C | -5.694068 | 2.279652  | -0.547498 | -0.336371 | -0.341823 |
| H | -4.872251 | 1.574003  | -0.510063 | 0.233743  | 0.242595  |
| C | -7.117419 | 3.889448  | 0.552607  | -0.392918 | -0.407324 |
| H | -7.435739 | 4.433151  | 1.434899  | 0.233074  | 0.254595  |
| C | -6.340655 | 2.527316  | -1.763486 | -0.249022 | -0.274351 |
| H | -6.031551 | 1.992696  | -2.655704 | 0.230518  | 0.246208  |
| C | -7.768377 | 4.143524  | -0.665449 | -0.244060 | -0.270421 |
| H | -8.572610 | 4.871219  | -0.702170 | 0.223653  | 0.244752  |
| C | -7.386065 | 3.462308  | -1.828238 | -0.241538 | -0.267112 |
| H | -7.891184 | 3.656013  | -2.768572 | 0.229959  | 0.249481  |
