# Supplementary figures and images for: Unveiling the promising in vitro anticancer activity of lipophilic platinum(ii) complexes containing (1S,4R,5R)-4-(4-phenyl-1H-1,2,3-triazol-1-yl)-2-((S)-1-phenylethyl)-2-azabicyclo[3.2.1]octane: a spectroscopic characterization and DFT calculation
Source: Royal Society of Chemistry journal article supplement (doi:10.1039/d4dt03021d), 2025-01-01

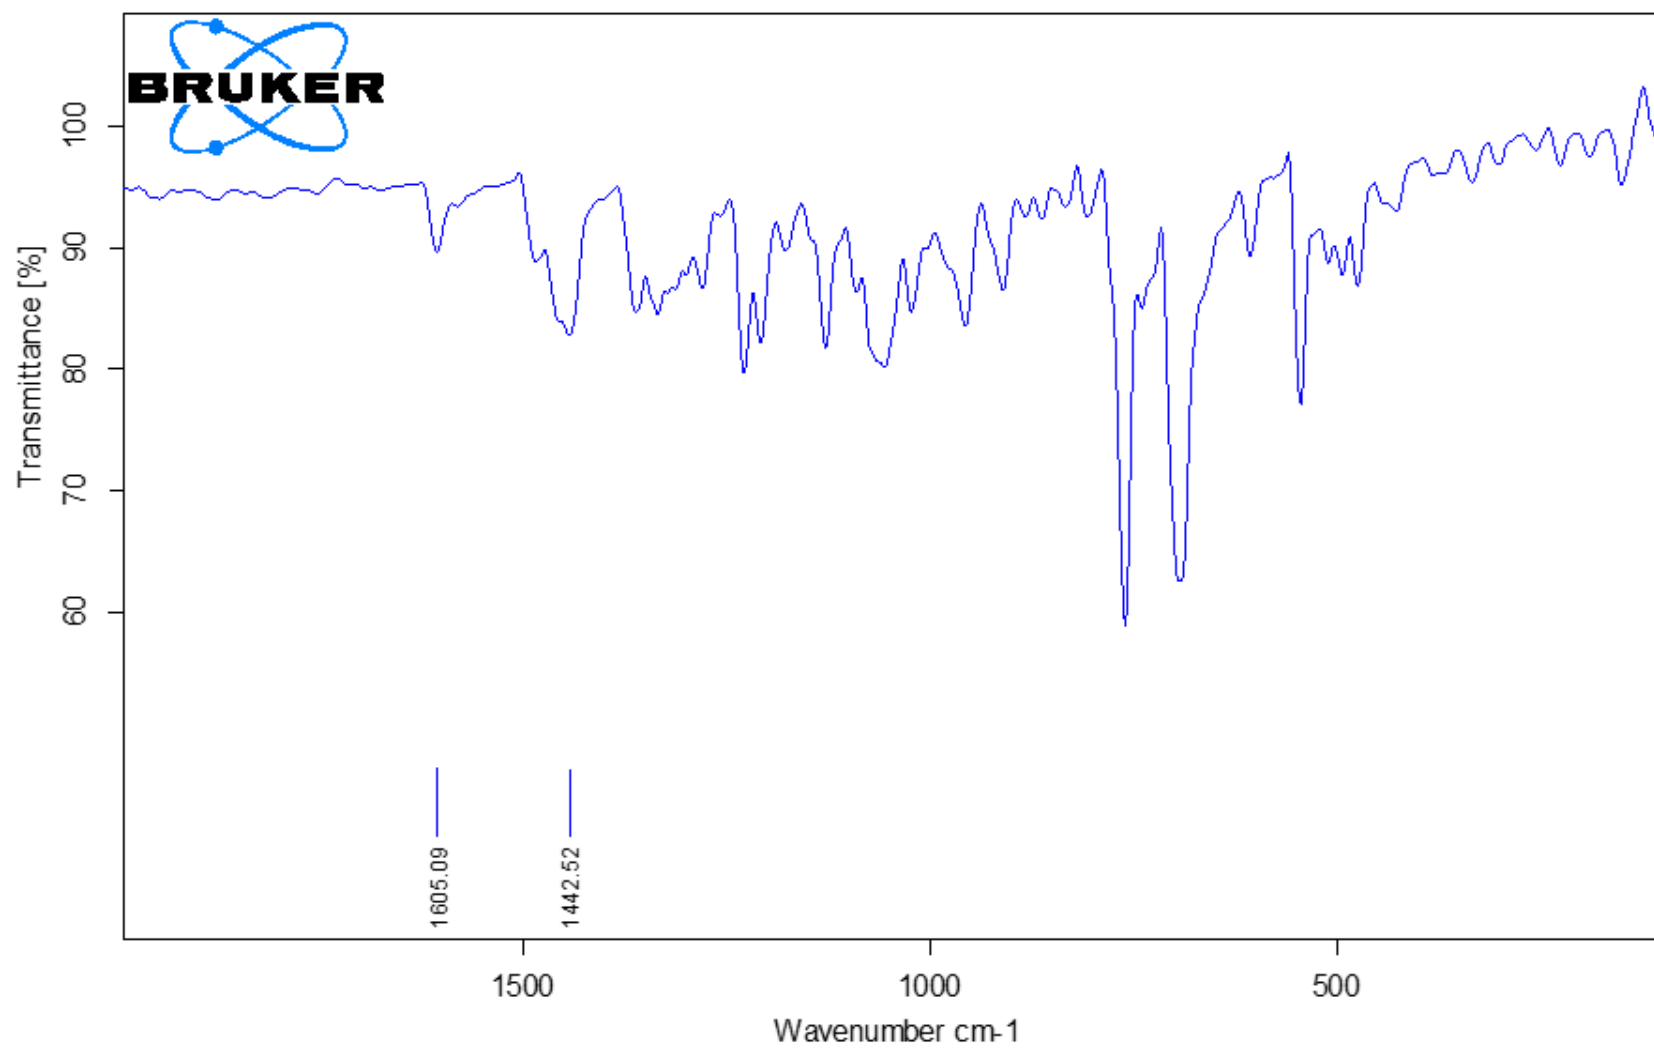

Figure S9. IR spectrum of ligand (L)

Supplement: d4dt03021d12.pdf [file d4dt03021d12.pdf]

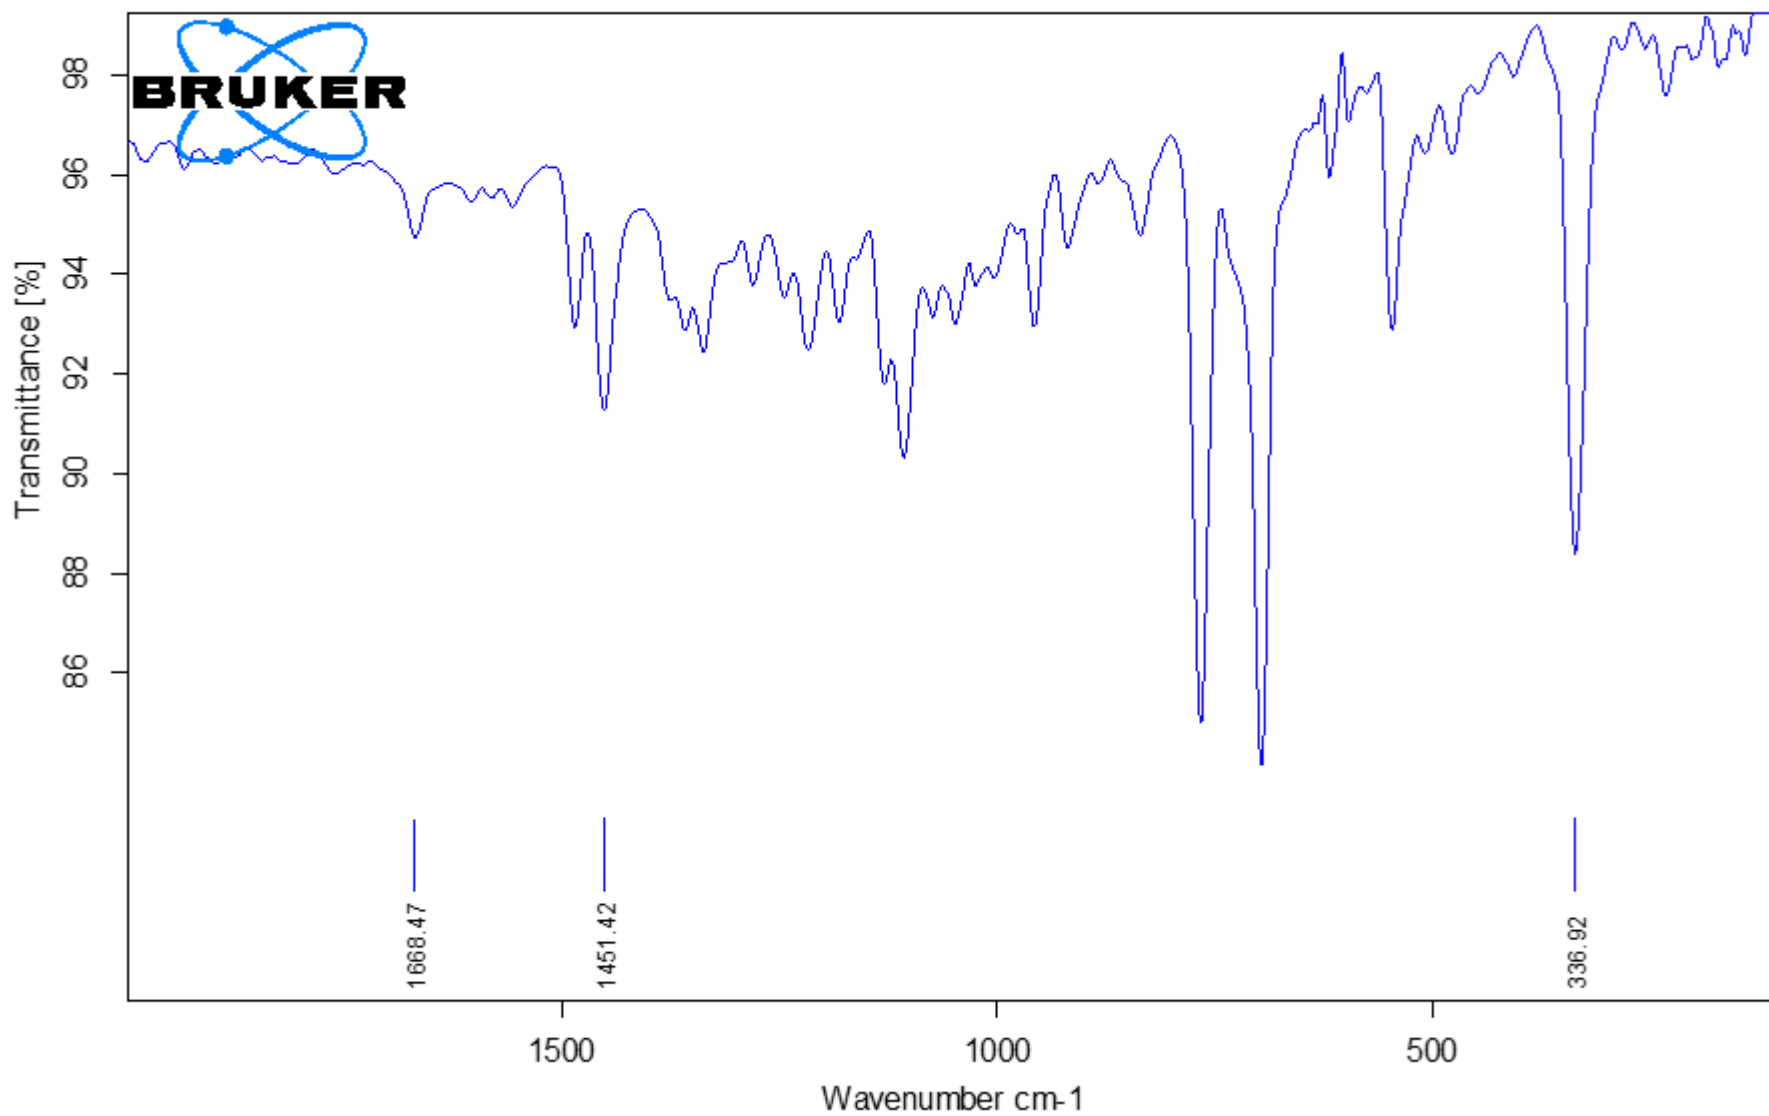

Figure S10. IR spectrum of *trans*-[PtCl<sub>2</sub>L<sub>2</sub>] (**1**)

Supplement: d4dt03021d2.pdf [file d4dt03021d2.pdf]

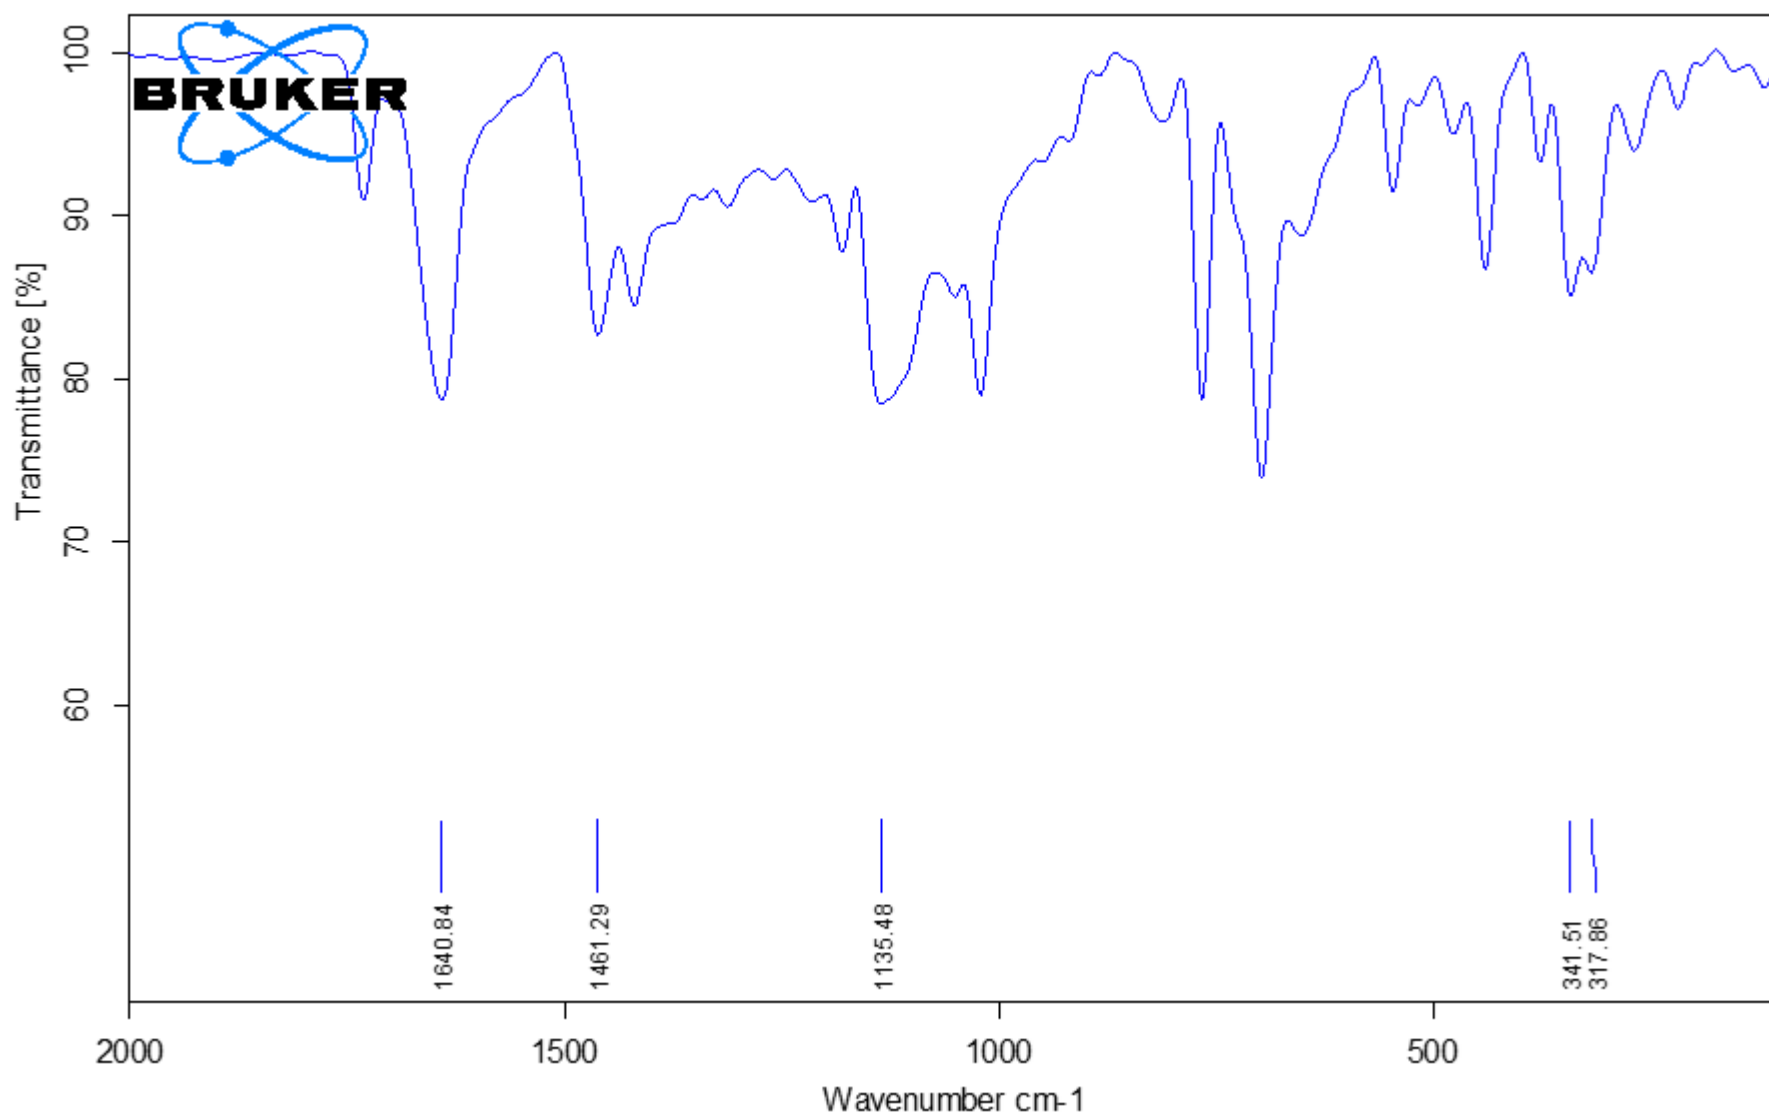

Figure S11. IR spectrum of *cis*-[PtCl<sub>2</sub>(DMSO)L] (**2**)

Supplement: d4dt03021d3.pdf [file d4dt03021d3.pdf]

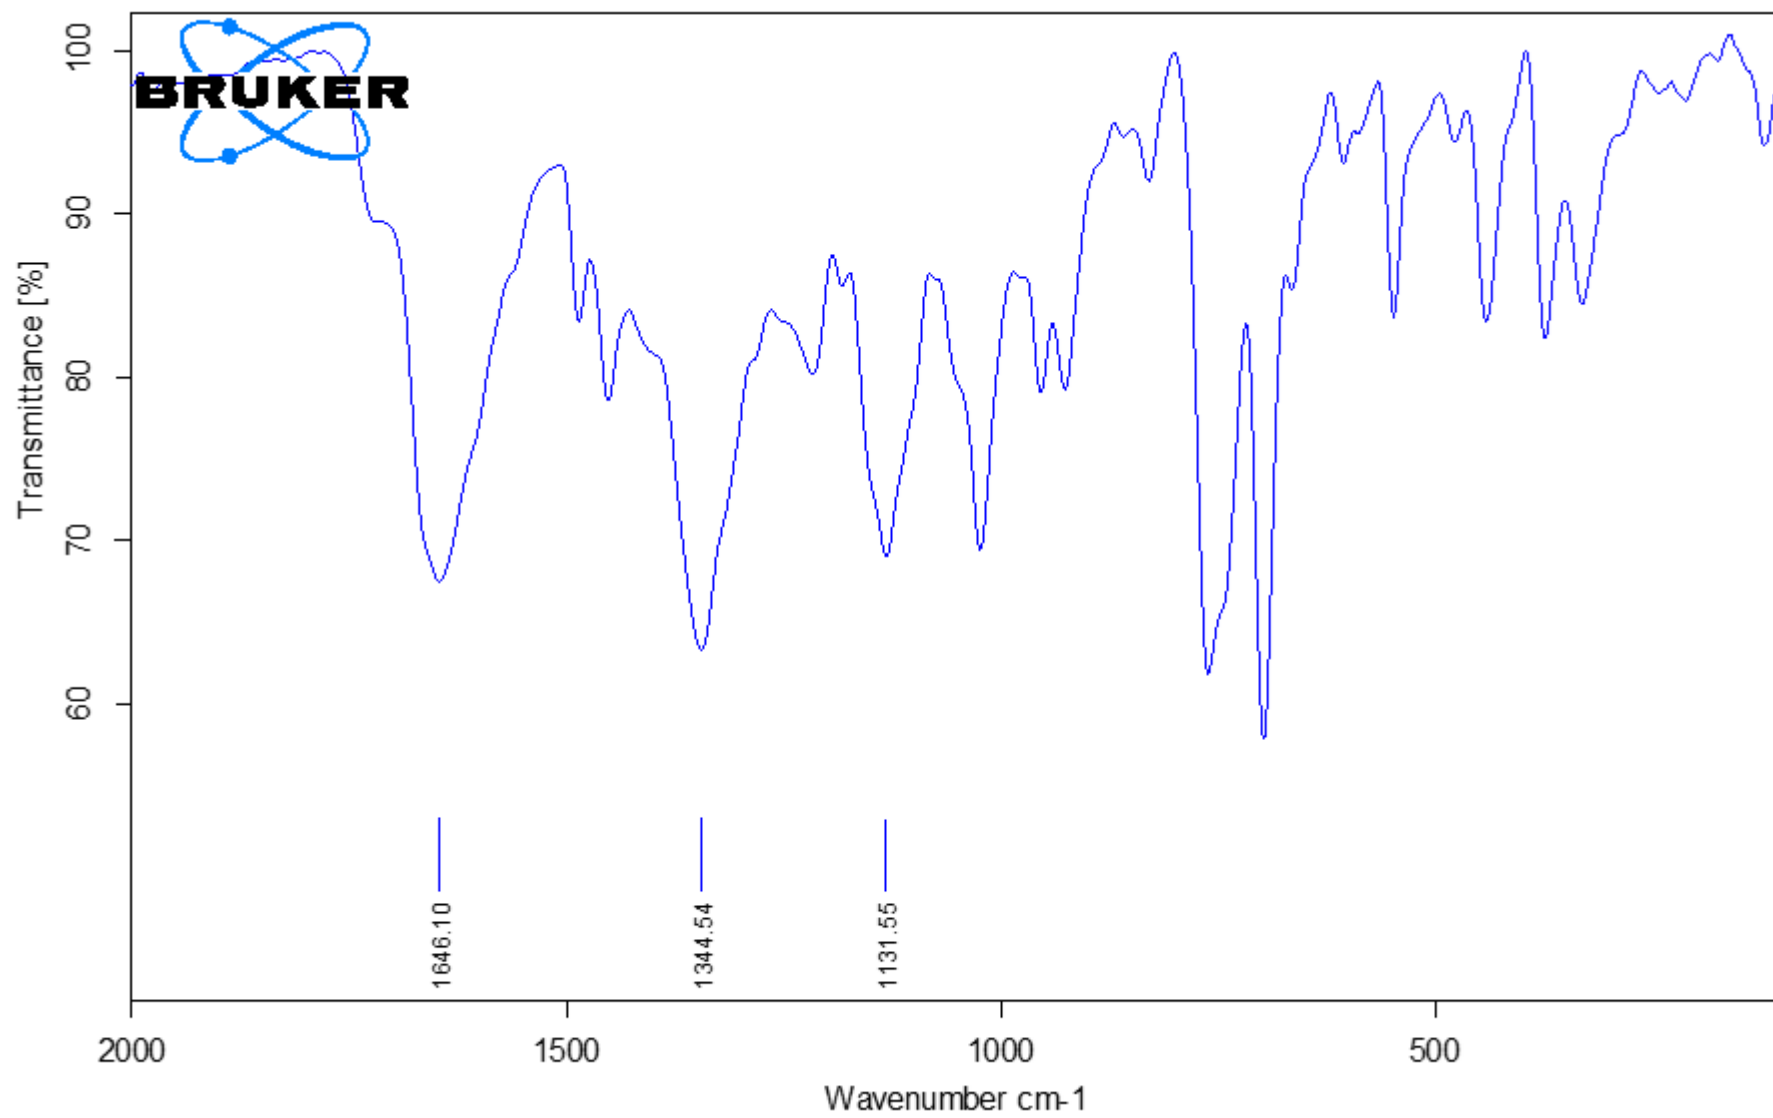

Figure S12. IR spectrum of Pt(DMSO)L(mal) (**3**)

Supplement: d4dt03021d4.pdf [file d4dt03021d4.pdf]
